# Supplementary material for: Nickel-catalyzed asymmetric hydrogenation of substituted cinnamic acid esters to synthesize methylsulfonyl-derived phenylalanine
Source: Royal Society of Chemistry journal article supplement (doi:10.1039/d4nj05102e), 2025-01-01
Supplement: d4nj05102e1.pdf [file d4nj05102e1.pdf]

# Supporting Information

Chunzhi Ju, Peng Wang, Lingkai Kong, Jisheng Cai, Guangliang Zhang\* and Suoqin Zhang \*

College of Chemistry, Jilin University, 2699 Qianjin Street, Changchun 130012, People's Republic of  
China.

Fax: (+86)-431-8515-5252;

phone: (+86)-431-8515-5252;

e-mail: suoqin@jlu.edu.cn.

## content

|                                                                         |    |
|-------------------------------------------------------------------------|----|
| 1. General Experimental Information.....                                | 2  |
| 2. Synthesis of methyl $\alpha$ -benzamidocinnamate (1a-1r).....        | 2  |
| 3. Asymmetric hydrogenation of methylsulfonylcinnamic acid esters ..... | 7  |
| 4. NMR Spectra.....                                                     | 15 |
| 5. HPLC Data .....                                                      | 42 |

## 1. General Experimental Information

The solvents used were purified by distillation. The alcohols were used without purification as commercially available. All reactions were monitored by thin layer chromatography and liquid chromatography. The reaction products were purified by flash column chromatography on 200-300 mesh silica gel. Optical rotations were measured using a 1.0 mL cell with a 1 cm path length on WZZ-2S digital polarimeter.  $^1\text{H}$  NMR and  $^{13}\text{C}$  NMR spectra were recorded on Bruker 400 MHz spectrometers (400 MHz for  $^1\text{H}$  NMR and 101 MHz for  $^{13}\text{C}$  NMR). The following abbreviations are used: s, singlet, d, doublet, t, triplet, m, multiplet, High-resolution mass spectral analysis (HRMS) data were measured on a Bruker micrOTOF QII mass spectrometer based on the ion trap ESI system. Enantiomeric excess values were measured by analytical HPLC with Daicel ChiralPak OD-H and OJ-H columns.

## 2. Synthesis of methyl $\alpha$ -benzamidoacrylate (1a-1r)

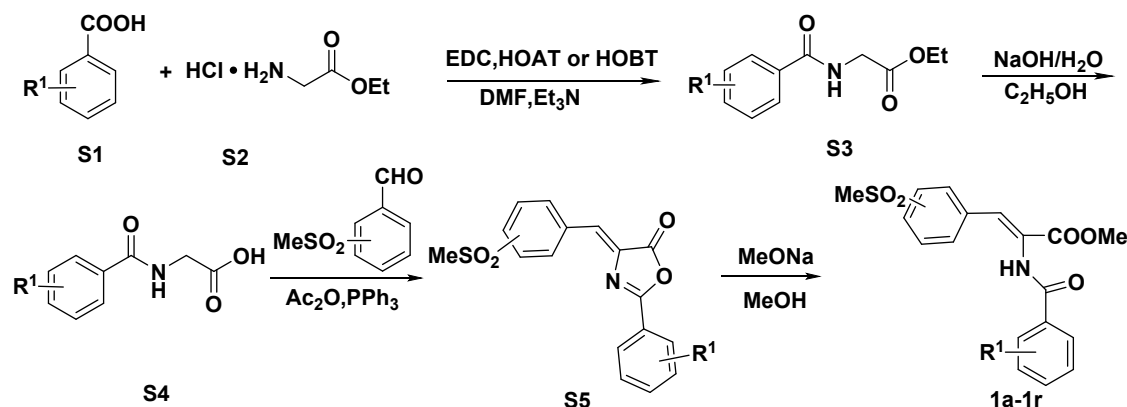

A mixture of benzoic acid derivative S1 (15.00 mmol), glycine ethyl ester hydrochloride (18.00 mmol), HOAT or HOBT (19.50 mmol), triethylamine (45.00 mmol), and DMF (15 mL) was cooled to 0°C, then EDC (19.50 mmol) was added. After stirring at 0°C for 1 hour, ethyl acetate (100 mL) was added. The resulting mixture was washed with 5% hydrochloric acid and 5% NaHCO<sub>3</sub>. The organic phases were

combined and concentrated. The crude product (**S3**) was used without further purification in the next step.

The **S3** (19.63 mmol) was dissolved in a 50% ethanol-water solution (30 mL), and NaOH (2 equiv.) were added. The mixture was stirred at room temperature for 1 hour, followed by evaporation of the ethanol, and extracted with ethyl acetate. The aqueous phase treated with 1N HCl solution to pH < 2. resulting in the precipitation of the hippuric acid derivative (**S4**).

The **S4** (3.87 mmol), methylsulfonylbenzaldehyde (4.46 mmol), triphenylphosphine (0.19 mmol), and acetic anhydride (3 mL) were mixed and heated to 140°C for a reaction lasting 0.5-8 h. After natural cooling to room temperature, the resulting oxazolone derivative (**S5**) was washed with hot water and ice-cold ethanol, then dried to constant weight.

The oxazolone derivative (**S5**, 1.30 mmol) was mixed with sodium methoxide (0.26 mmol) and methanol (5 mL) and stirred at room temperature for 5 minutes to 2 hours. Finally, the mixture was purified by column chromatography (petroleum ether/ethyl acetate = 1:1) to isolate the catalytic substrate (**1a-1r**).

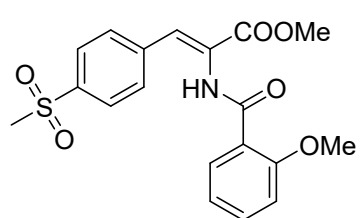

**Methyl 4-methylsulfonyl- $\alpha$ -(2-methoxybenzamido)cinnamate (**1a**)**

White solid (497.6 mg, 98% yield). <sup>1</sup>H NMR (400 MHz, DMSO-*d*<sub>6</sub>)  $\delta$  10.00 (s, 1H), 7.96 (s, 4H), 7.70 (d, *J* = 7.2 Hz, 1H), 7.55 (t, *J* = 7.7 Hz, 1H), 7.31 (s, 1H), 7.22 (d, *J* = 8.4 Hz, 1H), 7.08 (t, *J* = 7.5 Hz, 1H), 3.95 (s, 3H), 3.78 (s, 3H), 3.25 (s, 3H).

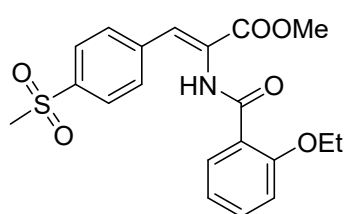

**Methyl 4-methylsulfonyl- $\alpha$ -(2-ethoxybenzamido)cinnamate (**1b**)**

White solid (505.1 mg, 96% yield). <sup>1</sup>H NMR (400 MHz, DMSO-*d*<sub>6</sub>)  $\delta$  9.96 (s, 1H), 7.96 – 7.86 (m, 4H), 7.75 (d, *J* = 7.6 Hz, 1H), 7.54 (t, *J* = 7.8 Hz, 1H), 7.34 (s, 1H), 7.21 (d, *J* = 8.4 Hz, 1H), 7.07 (t, *J* = 7.5 Hz, 1H), 4.23 (q, *J* = 6.9 Hz, 2H), 3.79 (s, 3H), 3.24 (s, 3H), 1.29 (t, *J* = 6.9 Hz, 3H).

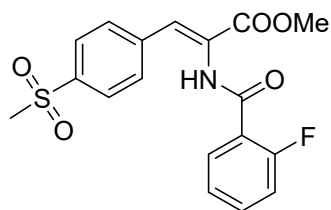

**Methyl 4-methylsulfonyl- $\alpha$ -(2-fluorobenzamido)cinnamate (1c)**

White solid (487.1 mg, 99% yield).  $^1\text{H}$  NMR (400 MHz,  $\text{DMSO-}d_6$ )  $\delta$  10.21 (s, 1H), 7.98 – 7.91 (m, 4H), 7.64 (dt,  $J = 30.3, 6.8$  Hz, 2H), 7.45 (s, 1H), 7.35 (q,  $J = 8.7, 7.1$  Hz, 2H), 3.78 (s, 3H), 3.25 (s, 3H).

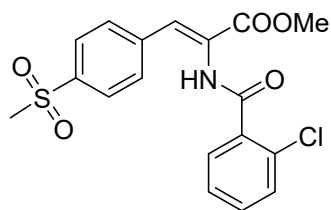

**Methyl 4-methylsulfonyl- $\alpha$ -(2-chlorobenzamido)cinnamate (1d)**

White solid (487.8 mg, 95% yield).  $^1\text{H}$  NMR (400 MHz,  $\text{DMSO-}d_6$ )  $\delta$  10.38 (s, 1H), 8.00 – 7.93 (m, 4H), 7.58 – 7.44 (m, 5H), 3.80 (s, 3H), 3.25 (s, 3H).

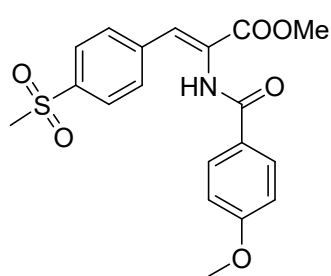

**Methyl 4-methylsulfonyl- $\alpha$ -(4-methoxybenzamido)cinnamate (1e)**

White solid (487.4 mg, 96% yield).  $^1\text{H}$  NMR (400 MHz,  $\text{DMSO-}d_6$ )  $\delta$  10.09 (s, 1H), 7.99 – 7.83 (m, 6H), 7.38 (s, 1H), 7.06 (d,  $J = 8.7$  Hz, 2H), 3.84 (s, 3H), 3.75 (s, 3H), 3.22 (s, 3H).

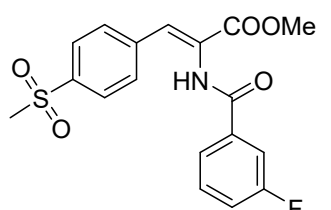

**Methyl 4-methylsulfonyl- $\alpha$ -(3-fluorobenzamido)cinnamate (1f)**

White solid (472.4 mg, 96% yield).  $^1\text{H}$  NMR (400 MHz,  $\text{DMSO-}d_6$ )  $\delta$  10.34 (s, 1H), 7.95 (d,  $J = 8.3$  Hz, 2H), 7.88 (d,  $J = 8.4$  Hz, 2H), 7.83 (d,  $J = 7.7$  Hz, 1H), 7.76 (d,  $J = 9.6$  Hz, 1H), 7.61 (q,  $J = 7.9$  Hz, 1H), 7.48 (d,  $J = 10.8$  Hz, 2H), 3.76 (s, 3H), 3.22 (s, 3H).

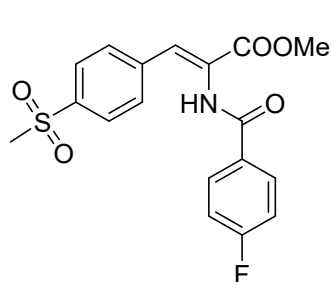

**Methyl 4-methylsulfonyl- $\alpha$ -(4-fluorobenzamido)cinnamate (1g)**

White solid (457.6 mg, 93% yield).  $^1\text{H}$  NMR (400 MHz,  $\text{DMSO-}d_6$ )  $\delta$  10.28 (s, 1H), 8.04 (dd,  $J = 8.2, 5.7$  Hz, 2H), 7.94 (d,  $J = 8.4$  Hz, 2H), 7.87 (d,  $J = 8.3$  Hz, 2H), 7.44 (s, 1H), 7.38 (t,  $J = 8.7$  Hz, 2H), 3.75 (s, 3H), 3.22 (s, 3H).

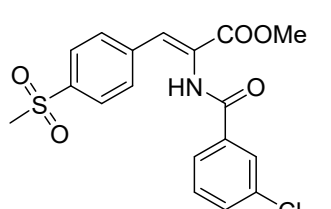

**Methyl 4-methylsulfonyl- $\alpha$ -(3-chlorobenzamido)cinnamate (1h)**

White solid (498.1 mg, 97% yield).  $^1\text{H}$  NMR (400 MHz,  $\text{DMSO-}d_6$ )  $\delta$  10.33 (s, 1H), 7.98 (d,  $J = 8.3$  Hz, 2H), 7.96 – 7.83 (m, 4H), 7.62 (d,  $J = 8.4$  Hz, 2H), 7.45 (s, 1H), 3.76 (s, 3H), 3.22 (s, 3H).

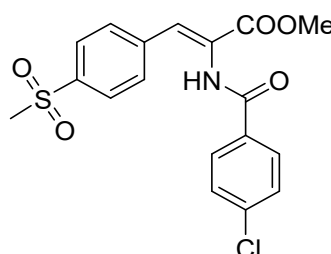

**Methyl 4-methylsulfonyl- $\alpha$ -(4-chlorobenzamido)cinnamate (1i)**

White solid (508.4 mg, 99% yield).  $^1\text{H NMR}$  (400 MHz,  $\text{DMSO-}d_6$ )  $\delta$  10.33 (s, 1H), 7.98 (d,  $J = 8.3$  Hz, 2H), 7.96 – 7.83 (m, 4H), 7.62 (d,  $J = 8.4$  Hz, 2H), 7.45 (s, 1H), 3.76 (s, 3H), 3.22 (s, 3H).

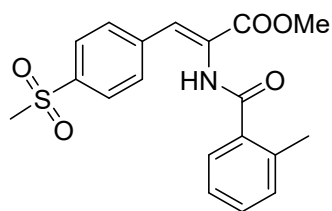

**Methyl 4-methylsulfonyl- $\alpha$ -(2-methylbenzamido)cinnamate (1j)**

White solid (482.0 mg, 99% yield).  $^1\text{H NMR}$  (400 MHz,  $\text{DMSO-}d_6$ )  $\delta$  10.15 (s, 1H), 7.98 (d,  $J = 8.3$  Hz, 2H), 7.90 (d,  $J = 8.3$  Hz, 2H), 7.50 (d,  $J = 7.4$  Hz, 1H), 7.44 – 7.36 (m, 2H), 7.31 (t,  $J = 7.2$  Hz, 2H), 3.79 (s, 3H), 3.24 (s, 3H), 2.39 (s, 3H).

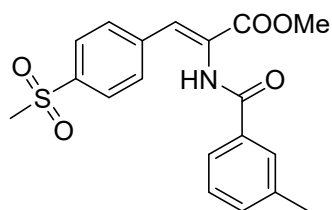

**Methyl 4-methylsulfonyl- $\alpha$ -(3-methylbenzamido)cinnamate (1k)**

White solid (472.3 mg, 97% yield).  $^1\text{H NMR}$  (400 MHz,  $\text{DMSO-}d_6$ )  $\delta$  10.21 (s, 1H), 7.94 (d,  $J = 8.2$  Hz, 2H), 7.87 (d,  $J = 8.3$  Hz, 2H), 7.81 – 7.73 (m, 2H), 7.42 (d,  $J = 3.9$  Hz, 3H), 3.75 (s, 3H), 3.22 (s, 3H), 2.39 (s, 3H).

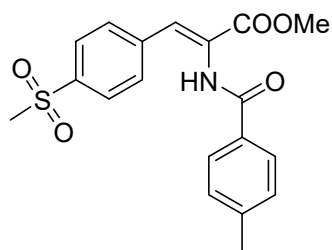

**Methyl 4-methylsulfonyl- $\alpha$ -(4-methylbenzamido)cinnamate (1l)**

White solid (462.5 mg, 95% yield).  $^1\text{H NMR}$  (400 MHz,  $\text{DMSO-}d_6$ )  $\delta$  10.16 (s, 1H), 7.93 (d,  $J = 8.3$  Hz, 2H), 7.87 (dd,  $J = 7.7, 3.5$  Hz, 4H), 7.41 (s, 1H), 7.34 (d,  $J = 7.9$  Hz, 2H), 3.75 (s, 3H), 3.22 (s, 3H), 2.39 (s, 3H).

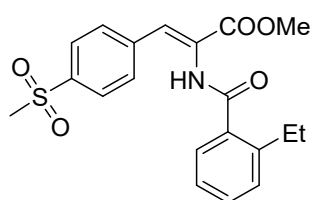

**Methyl 4-methylsulfonyl- $\alpha$ -(2-ethylbenzamido)cinnamate (1m)**

White solid (490.0 mg, 96% yield).  $^1\text{H NMR}$  (400 MHz,  $\text{DMSO-}d_6$ )  $\delta$  10.19 (s, 1H), 7.98 (d,  $J = 8.3$  Hz, 2H), 7.91 (d,  $J = 8.3$  Hz, 2H), 7.50 – 7.40 (m, 3H), 7.35 – 7.29 (m, 2H), 3.79 (s, 3H), 3.24 (s, 3H), 2.76 (q,  $J = 7.4$  Hz, 2H), 1.17 (t,  $J = 7.5$  Hz, 3H).

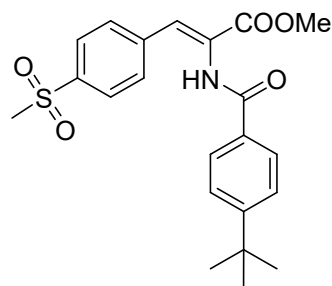

**Methyl 4-methylsulfonyl- $\alpha$ -(4-(tert-butyl)benzamido)cinnamate (1n)**

White solid (520.1 mg, 96% yield).  $^1\text{H NMR}$  (400 MHz,  $\text{DMSO-}d_6$ )  $\delta$  10.19 (s, 1H), 8.00 – 7.86 (m, 6H), 7.55 (d,  $J = 8.4$  Hz, 2H), 7.43 (s, 1H), 3.75 (s, 3H), 3.22 (s, 3H), 1.32 (s, 9H).

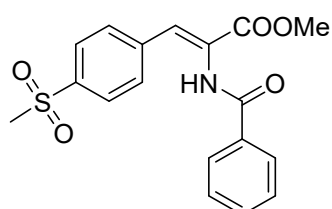

**Methyl 4-methylsulfonyl- $\alpha$ -benzamidocinnamate (1o)**

White solid (463.9 mg, 99% yield).  $^1\text{H NMR}$  (400 MHz,  $\text{DMSO-}d_6$ )  $\delta$  10.25 (s, 1H), 7.99 – 7.92 (m, 4H), 7.88 (d,  $J = 8.4$  Hz, 2H), 7.62 (t,  $J = 7.2$  Hz, 1H), 7.54 (t,  $J = 7.5$  Hz, 2H), 7.44 (s, 1H), 3.76 (s, 3H), 3.22 (s, 3H).

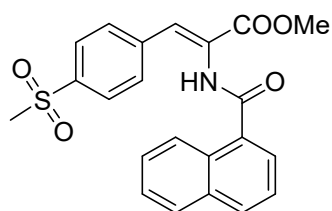

**Methyl 4-methylsulfonyl- $\alpha$ -(1-naphthamido)cinnamate (1p)**

White solid (507.1 mg, 95% yield).  $^1\text{H NMR}$  (400 MHz,  $\text{DMSO-}d_6$ )  $\delta$  10.45 (s, 1H), 8.29 (d,  $J = 8.3$  Hz, 1H), 8.09 (d,  $J = 8.2$  Hz, 1H), 7.99 (p,  $J = 9.0, 8.6$  Hz, 5H), 7.79 (d,  $J = 6.9$  Hz, 1H), 7.67 – 7.55 (m, 3H),

7.50 (s, 1H), 3.86 (s, 3H), 3.25 (s, 3H).

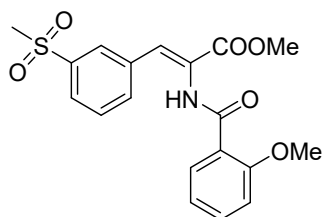

**Methyl 3-methylsulfonyl- $\alpha$ -(2-methoxybenzamido)cinnamate (1q)**

White solid (482.4 mg, 95% yield).  $^1\text{H NMR}$  (400 MHz,  $\text{DMSO-}d_6$ )  $\delta$  9.97 (s, 1H), 8.20 (s, 1H), 8.07 (d,  $J = 7.9$  Hz, 1H), 7.90 (d,  $J = 7.9$  Hz,

1H), 7.75 – 7.69 (m, 2H), 7.54 (d,  $J = 8.6$  Hz, 1H), 7.39 (s, 1H), 7.21 (d,  $J = 8.4$  Hz, 1H), 7.07 (t,  $J = 7.5$  Hz, 1H), 3.93 (s, 3H), 3.78 (s, 3H), 3.18 (s, 3H).

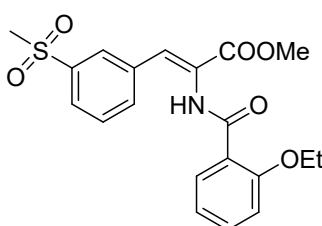

**Methyl 3-methylsulfonyl- $\alpha$ -(2-ethoxybenzamido)cinnamate (1r)**

White solid (510.3 mg, 97% yield).  $^1\text{H NMR}$  (400 MHz,  $\text{DMSO-}d_6$ )  $\delta$  9.97 (s, 1H), 8.13 (s, 1H), 8.01 (d,  $J = 7.8$  Hz, 1H), 7.90 (d,  $J = 7.9$  Hz, 1H), 7.78 (d,  $J = 7.7$  Hz, 1H), 7.69 (t,  $J = 7.8$  Hz, 1H), 7.54 (t,  $J = 7.8$

Hz, 1H), 7.41 (s, 1H), 7.22 (d,  $J = 8.4$  Hz, 1H), 7.08 (t,  $J = 7.5$  Hz, 1H), 4.23 (q,  $J = 6.9$  Hz, 2H), 3.80 (s, 3H), 3.18 (s, 3H), 1.29 (t,  $J = 6.9$  Hz, 3H).

### 3. Asymmetric hydrogenation of methylsulfonylcinnamic acid esters

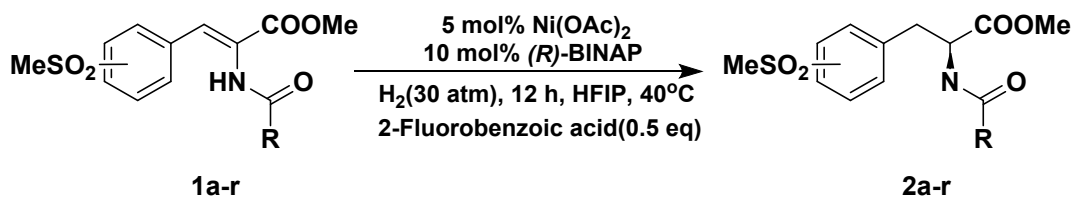

Ni(OAc)<sub>2</sub>·4H<sub>2</sub>O (0.9 mg, 0.0050 mmol), (*R*)-BINAP (6.2 mg, 0.0100 mmol), **1** (0.1 mmol) were added to a hydrogenation reaction tube. Then, HFIP (3.0 mL) was transferred into the reaction tube, which was subsequently placed into a high-pressure reactor and charged with hydrogen gas 5 times. The reaction was carried out under H<sub>2</sub> (30 atm) at 40°C for 12 hours. After the reaction was complete, the gas was slowly and carefully released, the mixture was evaporated, and then purified by chromatography using a short silica column (PE: EA= 1:1). Thus, obtain the product (**2a-2r**).

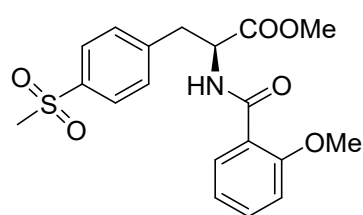

**Methyl (S)-2-(2-methoxybenzamido)-3-(4-(methylsulfonyl)phenyl)propanoate (2a)**

Colorless oil (36.4 mg, 93% yield). <sup>1</sup>H NMR (400 MHz, Chloroform-*d*) δ 8.45 (d, *J* = 7.2 Hz, 1H), 8.15 (d, *J* = 7.8 Hz, 1H),

7.83 (d, *J* = 7.9 Hz, 2H), 7.45 (t, *J* = 8.0 Hz, 1H), 7.35 (d, *J* = 7.9 Hz, 2H), 7.06 (t, *J* = 7.6 Hz, 1H), 6.95 (d, *J* = 8.4 Hz, 1H), 5.11 (q, *J* = 6.3 Hz, 1H), 3.84 (s, 3H), 3.74 (s, 3H), 3.39 (dd, *J* = 13.6, 5.5 Hz, 1H), 3.29 (dd, *J* = 13.6, 5.1 Hz, 1H), 3.02 (s, 3H). <sup>13</sup>C NMR (101 MHz, Chloroform-*d*) δ 171.64, 164.84, 157.76, 143.14, 139.24, 133.36, 132.18, 130.46, 127.44, 121.34, 120.61, 111.53, 55.97, 53.57, 52.52, 44.49, 37.78. HRMS (ESI) *m/z* calcd for C<sub>19</sub>H<sub>21</sub>NO<sub>6</sub>S [M+H]<sup>+</sup> 392.1162, found: 392.1167. HPLC conditions: Daicel Chiralcel OJ-H column, *n*-hexane/ethanol = 60/40, 254 nm, 1.0 mL/min, *t*<sub>major</sub> = 29.7 min, *t*<sub>minor</sub> = 25.5 min, ee = 96%. [*α*]<sub>D</sub><sup>25</sup> = + 21.21 (*c*=0.99, MeOH).

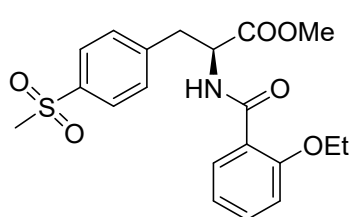

**Methyl (S)-2-(2-ethoxybenzamido)-3-(4-(methylsulfonyl)phenyl)propanoate (2b)**

Colorless oil (40.1 mg, 99% yield). <sup>1</sup>H NMR (400 MHz, Chloroform-*d*) δ 8.74 (d, *J* = 7.0 Hz, 1H), 8.22 (dd, *J* = 7.8, 1.6 Hz,

1H), 7.84 (d, *J* = 8.2 Hz, 2H), 7.46 (t, *J* = 8.6 Hz, 1H), 7.34 (d, *J* = 8.2 Hz, 2H), 7.08 (t, *J* = 7.6 Hz, 1H), 6.95 (d, *J* = 8.3 Hz, 1H), 5.18 (q, *J* = 5.7 Hz, 1H), 4.12 (q, *J* = 7.0 Hz, 2H), 3.75 (s, 3H), 3.43 (dd, *J* = 13.7, 6.0 Hz, 1H), 3.31 (dd, *J* = 13.7, 4.9 Hz, 1H), 3.03 (s, 3H), 1.29 (t, *J* = 7.0 Hz, 3H). <sup>13</sup>C NMR (101 MHz, Chloroform-*d*) δ 171.52, 164.78, 157.34, 143.17, 139.21, 133.34, 132.22, 130.49, 127.40, 121.19, 120.43, 112.32, 64.79, 53.63, 52.43, 44.51, 37.92, 14.50. HRMS (ESI) *m/z* calcd for C<sub>20</sub>H<sub>23</sub>NO<sub>6</sub>S

[M+H]<sup>+</sup> 405.1915, found: 405.1924. Daicel Chiralcel OJ-H column, *n*-hexane/ethanol = 60/40, 254 nm, 1.0 mL/min,  $t_{\text{major}} = 21.0$  min,  $t_{\text{minor}} = 17.1$  min, ee = 92%.  $[\alpha]_D^{25} = +39.80$  ( $c=0.98$ , MeOH).

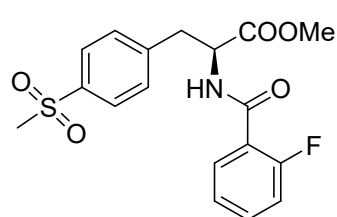

**Methyl (S)-2-(2-fluorobenzamido)-3-(4-(methylsulfonyl)phenyl)propanoate (2c)**

White solid (36.8 mg, 97% yield). <sup>1</sup>H NMR (400 MHz, Chloroform-*d*)  $\delta$  8.07 (t,  $J = 7.8$  Hz, 1H), 7.89 (d,  $J = 8.0$  Hz, 2H), 7.52 (q,  $J = 6.9$  Hz, 1H), 7.40 (d,  $J = 8.0$  Hz, 2H), 7.32 – 7.26 (m, 2H), 7.15 (dd,  $J = 12.0, 8.4$  Hz, 1H), 5.16 (q,  $J = 6.0$  Hz, 1H), 3.80 (s, 3H), 3.44 (dd,  $J = 13.9, 5.7$  Hz, 1H), 3.32 (dd,  $J = 13.8, 5.8$  Hz, 1H), 3.06 (s, 3H). <sup>13</sup>C NMR (101 MHz, Chloroform-*d*)  $\delta$  171.21, 162.92, 162.89, 142.59, 133.94, 133.85, 131.91, 130.35, 127.65, 124.94, 124.91, 116.35, 116.11, 53.58, 52.71, 44.52, 37.79. HRMS (ESI)  $m/z$  calcd for C<sub>18</sub>H<sub>18</sub>FNO<sub>5</sub>S [M+H]<sup>+</sup> 380.0973, found: 380.0978. Daicel Chiralcel OJ-H column, *n*-hexane/ethanol = 80/20, 254 nm, 1.0 mL/min,  $t_{\text{major}} = 77.1$  min,  $t_{\text{minor}} = 71.0$  min, ee = 95%.  $[\alpha]_D^{25} = +14.85$  ( $c=1.01$ , MeOH).

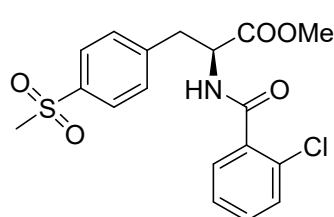

**Methyl (S)-2-(2-chlorobenzamido)-3-(4-(methylsulfonyl)phenyl)propanoate (2d)**

White solid (37.2 mg, 94% yield). <sup>1</sup>H NMR (400 MHz, Chloroform-*d*)  $\delta$  7.86 (d,  $J = 8.2$  Hz, 2H), 7.61 (d,  $J = 6.9$  Hz, 1H), 7.36 (dd,  $J = 25.5, 7.7$  Hz, 5H), 6.81 (d,  $J = 6.8$  Hz, 1H), 5.13 (q,  $J = 5.9$  Hz, 1H), 3.79 (s, 3H), 3.46 (dd,  $J = 13.9, 5.8$  Hz, 1H), 3.30 (dd,  $J = 13.9, 5.8$  Hz, 1H), 3.03 (s, 3H). <sup>13</sup>C NMR (101 MHz, Chloroform-*d*)  $\delta$  171.18, 165.90, 142.54, 139.47, 133.92, 131.83, 130.85, 130.48, 130.45, 130.19, 127.63, 127.21, 53.66, 52.76, 44.51, 37.71. HRMS (ESI)  $m/z$  calcd for C<sub>18</sub>H<sub>18</sub>ClNO<sub>5</sub>S [M+H]<sup>+</sup>: 396.0667. Found: 396.0674. Daicel Chiralcel OJ-H column, *n*-hexane/ethanol = 60/40, 254 nm, 1.0 mL/min,  $t_{\text{major}} = 15.6$  min,  $t_{\text{minor}} = 13.2$  min, ee = 91%.  $[\alpha]_D^{25} = +9.00$  ( $c=1.00$ , MeOH).

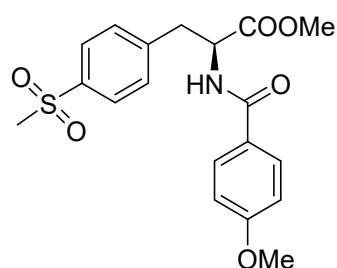

**Methyl (S)-2-(4-methoxybenzamido)-3-(4-(methylsulfonyl)phenyl)propanoate (2e)**

White solid (38.3 mg, 98% yield). <sup>1</sup>H NMR (400 MHz, Chloroform-*d*)  $\delta$  7.85 (d,  $J = 7.8$  Hz, 2H), 7.71 (d,  $J = 8.2$  Hz, 2H), 7.34 (d,  $J = 7.8$  Hz, 2H), 6.92 (d,  $J = 8.2$  Hz, 2H), 6.59 (d,  $J = 6.9$  Hz, 1H), 5.10 (q,  $J$



= 5.8 Hz, 1H), 3.85 (s, 3H), 3.78 (s, 3H), 3.41 (dd,  $J = 13.7, 5.8$  Hz, 1H), 3.29 (dd,  $J = 13.7, 5.1$  Hz, 1H), 3.04 (s, 3H).  $^{13}\text{C}$  NMR (101 MHz, Chloroform- $d$ )  $\delta$  171.69, 166.40, 162.66, 142.82, 139.36, 130.41, 128.87, 127.59, 125.70, 113.94, 55.47, 53.31, 52.69, 44.49, 37.82. HRMS (ESI)  $m/z$  Calcd for  $\text{C}_{19}\text{H}_{21}\text{NO}_6\text{S}$   $[\text{M}+\text{H}]^+$ : 392.1162. Found:392.1169. Daicel Chiralcel OJ-H column,  $n$ -hexane/ethanol = 60/40, 254 nm, 1.0 mL/min,  $t_{\text{major}} = 31.4$  min,  $t_{\text{minor}} = 23.8$  min, ee = 78%.  $[\alpha]_D^{25} = +11.22$  ( $c=0.98$ , MeOH).

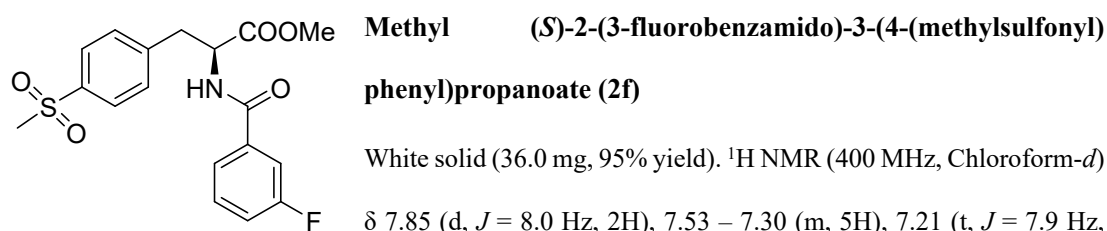

White solid (36.0 mg, 95% yield).  $^1\text{H}$  NMR (400 MHz, Chloroform- $d$ )  $\delta$  7.85 (d,  $J = 8.0$  Hz, 2H), 7.53 – 7.30 (m, 5H), 7.21 (t,  $J = 7.9$  Hz, 1H), 6.74 (d,  $J = 7.0$  Hz, 1H), 5.09 (q,  $J = 6.1$  Hz, 1H), 3.78 (s, 3H), 3.41 (dd,  $J = 13.8, 5.8$  Hz, 1H), 3.29 (dd,  $J = 13.8, 5.6$  Hz, 1H), 3.03 (s, 3H).  $^{13}\text{C}$  NMR (101 MHz, Chloroform- $d$ )  $\delta$  171.40, 165.65, 164.02, 161.56, 142.55, 139.48, 135.75, 135.68, 130.53, 130.46, 130.35, 127.67, 122.40, 122.38, 119.25, 119.04, 114.62, 114.39, 53.45, 52.83, 44.48, 37.68. HRMS (ESI)  $m/z$  Calcd for  $\text{C}_{18}\text{H}_{18}\text{FNO}_5\text{S}$   $[\text{M}+\text{H}]^+$ : 380.0973. Found:380.0985. Daicel Chiralcel OJ-H column,  $n$ -hexane/ethanol = 60/40, 254 nm, 1.0 mL/min,  $t_{\text{major}} = 16.2$  min,  $t_{\text{minor}} = 13.1$  min, ee = 62%.  $[\alpha]_D^{25} = +11.00$  ( $c=1.00$ , MeOH).

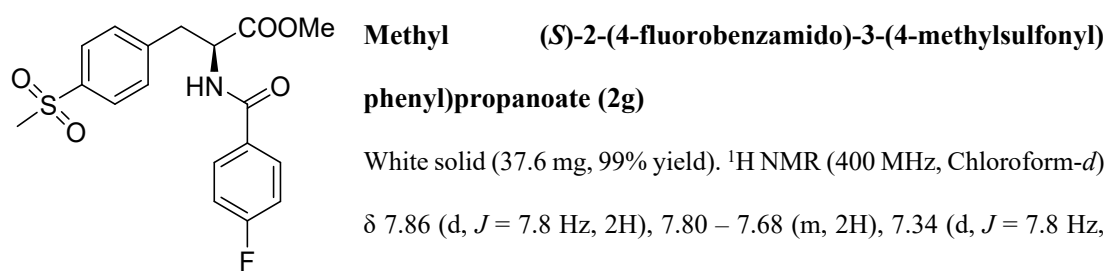

White solid (37.6 mg, 99% yield).  $^1\text{H}$  NMR (400 MHz, Chloroform- $d$ )  $\delta$  7.86 (d,  $J = 7.8$  Hz, 2H), 7.80 – 7.68 (m, 2H), 7.34 (d,  $J = 7.8$  Hz, 2H), 7.12 (t,  $J = 8.3$  Hz, 2H), 6.62 (d,  $J = 5.9$  Hz, 1H), 5.10 (q,  $J = 5.9$  Hz, 1H), 3.79 (s, 3H), 3.42 (dd,  $J = 13.8, 5.8$  Hz, 1H), 3.30 (dd,  $J = 13.8, 5.1$  Hz, 1H), 3.04 (s, 3H).  $^{13}\text{C}$  NMR (101 MHz, Chloroform- $d$ )  $\delta$  171.51, 165.81, 142.60, 139.52, 130.36, 129.43, 129.34, 127.65, 115.98, 115.76, 53.42, 52.77, 44.47, 37.78. HRMS (ESI)  $m/z$  calcd for  $\text{C}_{18}\text{H}_{18}\text{FNO}_5\text{S}$   $[\text{M}+\text{H}]^+$ : 380.0973. Found:380.0978. Daicel Chiralcel OJ-H column,  $n$ -hexane/ethanol = 60/40, 254 nm, 1.0 mL/min,  $t_{\text{major}} = 17.6$  min,  $t_{\text{minor}} = 14.3$  min, ee = 60%.  $[\alpha]_D^{25} = +12.63$  ( $c=0.95$ , MeOH).

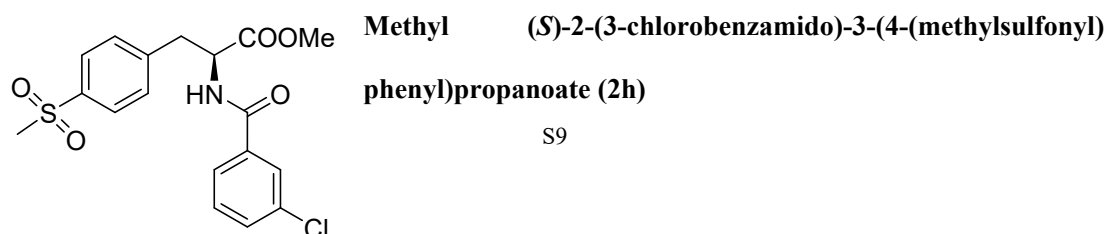

White solid (38.0 mg, 96% yield).  $^1\text{H NMR}$  (400 MHz, Chloroform-*d*)  $\delta$  7.85 (d,  $J = 8.2$  Hz, 2H), 7.72 (s, 1H), 7.58 (d,  $J = 7.8$  Hz, 1H), 7.49 (d,  $J = 7.4$  Hz, 1H), 7.36 (dd,  $J = 16.2, 8.0$  Hz, 3H), 6.72 (s, 1H), 5.08 (q,  $J = 5.8$  Hz, 1H), 3.79 (s, 3H), 3.41 (dd,  $J = 13.8, 5.8$  Hz, 1H), 3.29 (dd,  $J = 13.9, 5.6$  Hz, 1H), 3.03 (s, 3H).  $^{13}\text{C NMR}$  (101 MHz, Chloroform-*d*)  $\delta$  171.41, 165.61, 142.55, 139.50, 135.25, 134.97, 132.12, 130.34, 130.09, 127.67, 127.45, 125.00, 53.46, 52.82, 44.49, 37.69. HRMS (ESI)  $m/z$  calcd for  $\text{C}_{18}\text{H}_{18}\text{ClNO}_5\text{S}$   $[\text{M}+\text{H}]^+$ : 396.0667. Found:396.0678. Daicel Chiralcel OJ-H column, *n*-hexane/ethanol = 60/40, 254 nm, 1.0 mL/min,  $t_{\text{major}} = 14.8$  min,  $t_{\text{minor}} = 11.8$  min, ee = 58%.  $[\alpha]_D^{25} = +11.65$  ( $c=1.03$ , MeOH).

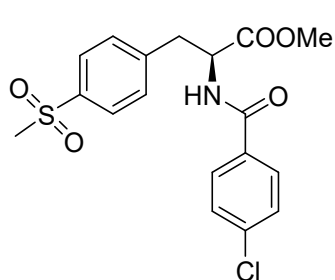

**Methyl (S)-2-(4-chlorobenzamido)-3-(4-(methylsulfonyl)phenyl)propanoate (2i)**

White solid (35.6 mg, 90% yield).  $^1\text{H NMR}$  (400 MHz, Chloroform-*d*)  $\delta$  7.84 (d,  $J = 8.1$  Hz, 2H), 7.67 (d,  $J = 8.5$  Hz, 2H), 7.40 (d,  $J = 7.7$  Hz, 2H), 7.33 (d,  $J = 8.2$  Hz, 2H), 6.70 (s, 1H), 5.08 (q,  $J = 5.9$  Hz, 1H), 3.78 (s, 3H), 3.40 (dd,  $J = 13.8, 5.8$  Hz, 1H), 3.29 (dd,  $J = 13.8, 5.5$  Hz, 1H), 3.03 (s, 3H).  $^{13}\text{C NMR}$  (101 MHz, Chloroform-*d*)  $\delta$  171.46, 165.86, 142.61, 139.48, 138.41, 131.82, 130.35, 129.03, 128.46, 127.64, 53.44, 52.80, 44.47, 37.70. HRMS (ESI)  $m/z$  calcd for  $\text{C}_{18}\text{H}_{18}\text{ClNO}_5\text{S}$   $[\text{M}+\text{H}]^+$ : 396.0667. Found:396.0679. Daicel Chiralcel OJ-H column, *n*-hexane/ethanol = 60/40, 254 nm, 1.0 mL/min,  $t_{\text{major}} = 18.3$  min,  $t_{\text{minor}} = 14.3$  min, ee = 57%.  $[\alpha]_D^{25} = +8.91$  ( $c=1.01$ , MeOH).

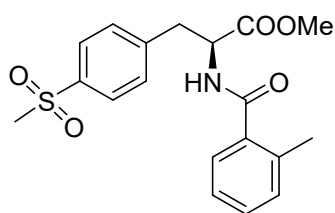

**Methyl (S)-2-(2-methylbenzamido)-3-(4-(methylsulfonyl)phenyl)propanoate (2j)**

White solid (37.1 mg, 90% yield).  $^1\text{H NMR}$  (400 MHz, Chloroform-*d*)  $\delta$  7.90 – 7.76 (m, 2H), 7.40 – 7.26 (m, 4H), 7.24 – 7.15 (m, 2H), 6.34 (d,  $J = 7.2$  Hz, 1H), 5.11 (q,  $J = 7.5, 6.7$  Hz, 1H), 3.79 (s, 3H), 3.43 (dd,  $J = 13.8, 5.5$  Hz, 1H), 3.25 (dd,  $J = 13.9, 6.3$  Hz, 1H), 3.02 (s, 3H), 2.36 (s, 3H).  $^{13}\text{C NMR}$  (101 MHz, Chloroform-*d*)  $\delta$  171.52, 169.45, 142.74, 139.44, 136.47, 135.14, 131.27, 130.44, 130.37, 127.66, 126.74, 125.88, 53.11, 52.76, 44.50, 37.89, 19.80. HRMS (ESI)  $m/z$  calcd for  $\text{C}_{19}\text{H}_{21}\text{NO}_5\text{S}$   $[\text{M}+\text{H}]^+$ : 376.1213. Found:376.1231. Daicel Chiralcel OJ-H column, *n*-hexane/ethanol = 60/40, 254 nm, 1.0 mL/min,  $t_{\text{major}} = 15.8$  min,  $t_{\text{minor}} = 12.7$  min, ee = 54%.  $[\alpha]_D^{25} = +9.00$  ( $c=1.00$ , MeOH).

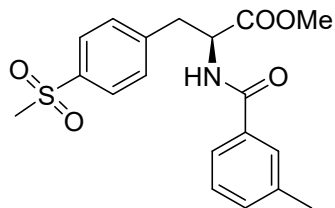

**Methyl (S)-2-(3-methylbenzamido)-3-(4-(methylsulfonyl)phenyl)propanoate (2k)**

White solid (36.0 mg, 96% yield). <sup>1</sup>H NMR (400 MHz, Chloroform-*d*) δ 7.85 (d, *J* = 8.0 Hz, 2H), 7.56 (s, 1H), 7.50 (d, *J* = 6.2 Hz, 1H), 7.33 (q, *J* = 8.2, 7.6 Hz, 4H), 6.66 (d, *J* = 6.7 Hz, 1H), 5.11 (q, *J* = 5.9 Hz, 1H), 3.78 (s, 3H), 3.43 (dd, *J* = 13.8, 5.8 Hz, 1H), 3.30 (dd, *J* = 13.8, 5.2 Hz, 1H), 3.04 (s, 3H), 2.39 (s, 3H). <sup>13</sup>C NMR (101 MHz, Chloroform-*d*) δ 171.60, 167.09, 142.74, 139.38, 138.69, 133.45, 132.85, 130.40, 128.63, 127.74, 127.61, 123.93, 53.36, 52.74, 44.49, 37.77, 21.37. HRMS (ESI) *m/z* calcd for C<sub>19</sub>H<sub>21</sub>NO<sub>5</sub>S [M+H]<sup>+</sup>: 376.1213. Found: 376.1224. Daicel Chiralcel OJ-H column, *n*-hexane/ethanol = 60/40, 254 nm, 1.0 mL/min, *t*<sub>major</sub> = 12.7 min, *t*<sub>minor</sub> = 10.4 min, ee = 70%. [α]<sub>D</sub><sup>25</sup> = + 8.25 (*c*=0.97, MeOH).

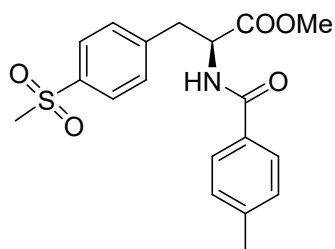

**Methyl (S)-2-(4-methylbenzamido)-3-(4-(methylsulfonyl)phenyl)propanoate (2l)**

White solid (36.8 mg, 98% yield). <sup>1</sup>H NMR (400 MHz, Chloroform-*d*) δ 7.88 (d, *J* = 7.9 Hz, 2H), 7.67 (d, *J* = 7.8 Hz, 2H), 7.37 (d, *J* = 7.9 Hz, 2H), 7.29 (d, *J* = 4.7 Hz, 2H), 6.67 (d, *J* = 6.8 Hz, 1H), 5.14 (q, *J* = 5.9 Hz, 1H), 3.81 (s, 3H), 3.45 (dd, *J* = 13.8, 5.8 Hz, 1H), 3.33 (dd, *J* = 13.8, 5.2 Hz, 1H), 3.07 (s, 3H), 2.43 (s, 3H). <sup>13</sup>C NMR (101 MHz, Chloroform-*d*) δ 171.61, 166.81, 142.76, 142.66, 139.41, 130.65, 130.40, 129.41, 127.60, 126.99, 53.32, 52.69, 44.49, 37.81, 21.49. HRMS (ESI) *m/z* calcd for C<sub>19</sub>H<sub>21</sub>NO<sub>5</sub>S [M+H]<sup>+</sup>: 376.1213. Found: 376.1228. Daicel Chiralcel OJ-H column, *n*-hexane/ethanol = 60/40, 254 nm, 1.0 mL/min, *t*<sub>major</sub> = 18.9 min, *t*<sub>minor</sub> = 14.8 min, ee = 70%. [α]<sub>D</sub><sup>25</sup> = + 6.93 (*c*=1.01, MeOH).

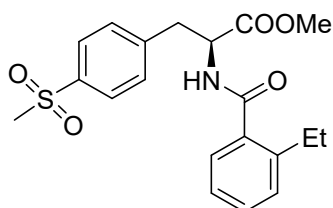

**Methyl (S)-2-(2-ethylbenzamido)-3-(4-(methylsulfonyl)phenyl)propanoate (2m)**

White solid (37.0 mg, 95% yield). <sup>1</sup>H NMR (400 MHz, Chloroform-*d*) δ 7.89 (d, *J* = 7.8 Hz, 2H), 7.39 (dd, *J* = 17.0, 7.8 Hz, 3H), 7.27 (d, *J* = 8.7 Hz, 2H), 7.21 (t, *J* = 7.4 Hz, 1H), 6.40 – 6.30 (m, 1H), 5.14 (q, *J* = 6.4 Hz, 1H),

3.81 (s, 3H), 3.45 (dd,  $J = 13.9, 5.6$  Hz, 1H), 3.27 (dd,  $J = 13.9, 6.5$  Hz, 1H), 3.05 (s, 3H), 2.73 (q,  $J = 7.5$  Hz, 2H), 1.19 (t,  $J = 7.5$  Hz, 3H).  $^{13}\text{C}$  NMR (101 MHz, Chloroform- $d$ )  $\delta$  171.50, 169.68, 142.76, 142.73, 139.43, 134.92, 130.54, 130.34, 129.71, 127.67, 126.77, 125.87, 53.09, 52.75, 44.50, 37.86, 26.26, 15.95. HRMS (ESI)  $m/z$  calcd for  $\text{C}_{20}\text{H}_{23}\text{NO}_5\text{S}$   $[\text{M}+\text{H}]^+$ : 390.1370. Found: 390.1353. Daicel Chiralcel OJ-H column,  $n$ -hexane/ethanol = 60/40, 254 nm, 1.0 mL/min,  $t_{\text{major}} = 11.4$  min,  $t_{\text{minor}} = 10.0$  min, ee = 56%.  $[\alpha]_D^{25} = +17.48$  ( $c=1.03$ , MeOH).

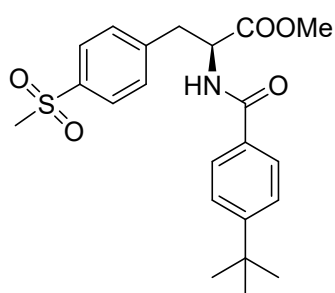

**Methyl (S)-2-(4-(tert-butyl)benzamido)-3-(4-(methylsulfonyl)phenyl)propanoate (2n)**

White solid (40.1 mg, 96% yield).  $^1\text{H}$  NMR (400 MHz, Chloroform- $d$ )  $\delta$  7.85 (d,  $J = 8.3$  Hz, 2H), 7.68 (d,  $J = 8.4$  Hz, 2H), 7.46 (d,  $J = 8.5$  Hz, 2H), 7.34 (d,  $J = 8.2$  Hz, 2H), 6.66 (d,  $J = 7.1$  Hz, 1H), 5.12 (q,  $J = 5.7$  Hz, 1H), 3.78 (s, 3H), 3.43 (dd,  $J = 13.8, 5.8$  Hz, 1H), 3.30 (dd,  $J = 13.8, 5.3$  Hz, 1H), 3.04 (s, 3H), 1.33 (s, 9H).  $^{13}\text{C}$  NMR (101 MHz, Chloroform- $d$ )  $\delta$  171.61, 166.84, 155.73, 142.75, 139.35, 130.57, 130.42, 127.62, 126.86, 125.73, 53.29, 52.74, 44.51, 37.77, 35.01, 31.14. HRMS (ESI)  $m/z$  calcd for  $\text{C}_{22}\text{H}_{27}\text{NO}_5\text{S}$   $[\text{M}+\text{H}]^+$ : 481.730. Found: 418.1738. Daicel Chiralcel OJ-H column,  $n$ -hexane/ethanol = 80/20, 254 nm, 1.0 mL/min,  $t_{\text{major}} = 32.8$  min,  $t_{\text{minor}} = 27.8$  min, ee = 66%.  $[\alpha]_D^{25} = +8.08$  ( $c=0.99$ , MeOH).

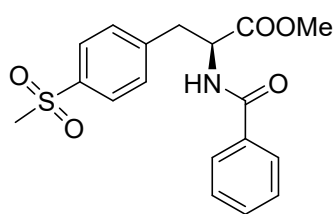

**Methyl (S)-2-benzamido-3-(4-(methylsulfonyl)phenyl)propanoate (2o)**

White solid (35.8 mg, 99% yield).  $^1\text{H}$  NMR (400 MHz, Chloroform- $d$ )  $\delta$  7.84 (d,  $J = 8.2$  Hz, 2H), 7.73 (d,  $J = 7.3$  Hz, 2H), 7.52 (t,  $J = 7.4$  Hz, 1H), 7.43 (t,  $J = 7.5$  Hz, 2H), 7.34 (d,  $J = 8.2$  Hz, 2H), 6.71 (d,  $J = 7.1$  Hz, 1H), 5.11 (q,  $J = 5.8$  Hz, 1H), 3.78 (s, 3H), 3.42 (dd,  $J = 13.8, 5.8$  Hz, 1H), 3.29 (dd,  $J = 13.8, 5.4$  Hz, 1H), 3.03 (s, 3H).  $^{13}\text{C}$  NMR (101 MHz, Chloroform- $d$ )  $\delta$  171.55, 166.94, 142.75, 139.39, 133.50, 132.09, 130.39, 128.76, 127.62, 127.01, 53.38, 52.74, 44.49, 37.74. HRMS (ESI)  $m/z$  calcd for  $\text{C}_{18}\text{H}_{19}\text{NO}_5\text{S}$   $[\text{M}+\text{H}]^+$ : 362.1057. Found: 362.1065. Daicel Chiralcel OD-H column,  $n$ -hexane/ethanol = 70/30, 254 nm, 1.0 mL/min,  $t_{\text{major}} = 9.9$  min,  $t_{\text{minor}} = 7.6$  min, ee = 68%.  $[\alpha]_D^{25} = +13.00$  ( $c=1.00$ , MeOH).

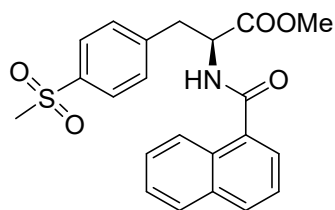

**Methyl (S)-2-(1-naphthamido)-3-(4-(methylsulfonyl)phenyl)propanoate (2p)**

White solid (39.9 mg, 99% yield). <sup>1</sup>H NMR (400 MHz, Chloroform-*d*) δ 8.22 – 8.16 (m, 1H), 7.91 (dd, *J* = 23.1, 8.1 Hz, 4H), 7.55 (t, *J* = 7.0 Hz, 3H), 7.44 (dd, *J* = 15.1, 7.8 Hz, 3H), 6.49 (d, *J* = 7.5 Hz, 1H), 5.27 (q, *J* = 6.3 Hz, 1H), 3.83 (s, 3H), 3.53 (dd, *J* = 14.0, 5.7 Hz, 1H), 3.32 (dd, *J* = 13.8, 6.3 Hz, 1H), 3.04 (s, 3H). <sup>13</sup>C NMR (101 MHz, Chloroform-*d*) δ 171.49, 169.00, 142.71, 139.48, 133.72, 133.18, 131.28, 130.43, 130.06, 130.03, 128.43, 127.71, 127.38, 126.63, 125.20, 125.10, 124.68, 53.31, 52.83, 44.50. HRMS (ESI) *m/z* calcd for C<sub>22</sub>H<sub>21</sub>NO<sub>5</sub>S [M+H]<sup>+</sup>: 412.1247. Found:412.1254. Daicel Chiralcel OJ-H column, *n*-hexane/ethanol = 70/30, 254 nm, 1.0 mL/min, *t*<sub>major</sub> = 26.6 min, *t*<sub>minor</sub> = 20.0 min, ee = 58%.  $[\alpha]_D^{25} = +12.63$  (*c*=0.95, MeOH).

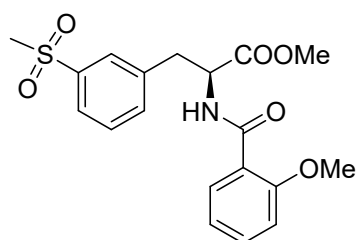

**Methyl (S)-2-(2-methoxybenzamido)-3-(3-(methylsulfonyl)phenyl)propanoate (2q)**

Colorless oil (36.0 mg, 92% yield). <sup>1</sup>H NMR (400 MHz, Chloroform-*d*) δ 8.50 (d, *J* = 7.1 Hz, 1H), 8.15 (d, *J* = 7.8 Hz, 1H), 7.81 (d, *J* = 3.7 Hz, 1H), 7.73 (s, 1H), 7.48 (t, *J* = 5.7 Hz, 3H), 7.07 (t, *J* = 7.6 Hz, 1H), 6.97 (d, *J* = 8.3 Hz, 1H), 5.14 (q, *J* = 6.1 Hz, 1H), 3.89 (s, 3H), 3.78 (s, 3H), 3.42 (dd, *J* = 13.8, 5.4 Hz, 1H), 3.27 (dd, *J* = 13.8, 6.1 Hz, 1H), 2.93 (s, 3H). <sup>13</sup>C NMR (101 MHz, Chloroform-*d*) δ 171.72, 164.79, 157.82, 140.66, 138.43, 134.81, 133.36, 132.20, 129.46, 128.26, 125.94, 121.31, 120.53, 111.51, 56.06, 53.65, 52.58, 44.38, 37.88. HRMS (ESI) *m/z* calcd for C<sub>19</sub>H<sub>21</sub>NO<sub>6</sub>S [M+H]<sup>+</sup>: 392.1162. Found:392.1168. Daicel Chiralcel OJ-H column, *n*-hexane/ethanol = 80/20, 254 nm, 1.0 mL/min, *t*<sub>major</sub> = 63.0 min, *t*<sub>minor</sub> = 56.1 min, ee = 92%.  $[\alpha]_D^{25} = +19.79$  (*c*=0.96, MeOH).

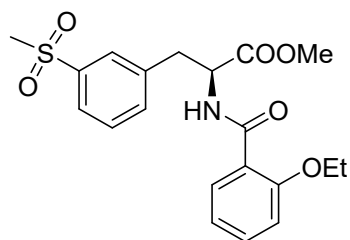

**Methyl (S)-2-(2-ethoxybenzamido)-3-(3-(methylsulfonyl)phenyl)propanoate (2r)**

Colorless oil (38.9 mg, 96% yield). <sup>1</sup>H NMR (400 MHz, Chloroform-*d*) δ 8.77 (d, *J* = 7.2 Hz, 1H), 8.19 (dd, *J* = 7.8, 1.8 Hz, 1H), 7.81 (dt, *J* = 7.0, 1.9 Hz, 1H), 7.69 (s, 1H), 7.50 – 7.42 (m, 3H),

7.09 – 7.04 (m, 1H), 6.95 (d,  $J = 8.3$  Hz, 1H), 5.21 – 5.15 (m, 1H), 4.13 (qd,  $J = 7.0, 1.9$  Hz, 2H), 3.77 (s, 3H), 3.43 (dd,  $J = 13.8, 5.6$  Hz, 1H), 3.27 (dd,  $J = 13.8, 5.4$  Hz, 1H), 2.91 (s, 3H), 1.30 (t,  $J = 7.0$  Hz, 3H).  $^{13}\text{C}$  NMR (101 MHz, Chloroform-*d*)  $\delta$  171.56, 164.70, 157.39, 140.62, 138.40, 134.88, 133.34, 132.20, 129.37, 128.35, 125.86, 121.13, 120.31, 112.29, 64.80, 53.67, 52.50, 44.35, 37.99, 14.50. HRMS (ESI)  $m/z$  calcd for  $\text{C}_{19}\text{H}_{21}\text{NO}_6\text{S}$   $[\text{M}+\text{H}]^+$ : 4051915. Found:405.1933. Daicel Chiralcel OJ-H column, *n*-hexane/ethanol = 60/40, 254 nm, 1.0 mL/min,  $t_{\text{major}} = 17.7$  min,  $t_{\text{minor}} = 14.6$  min, ee = 90%.  $[\alpha]_D^{25} = + 30.00$  ( $c=1.10$ , MeOH).

## 4. NMR Spectra

1a <sup>1</sup>H NMR (400 MHz, DMSO-d<sub>6</sub>)

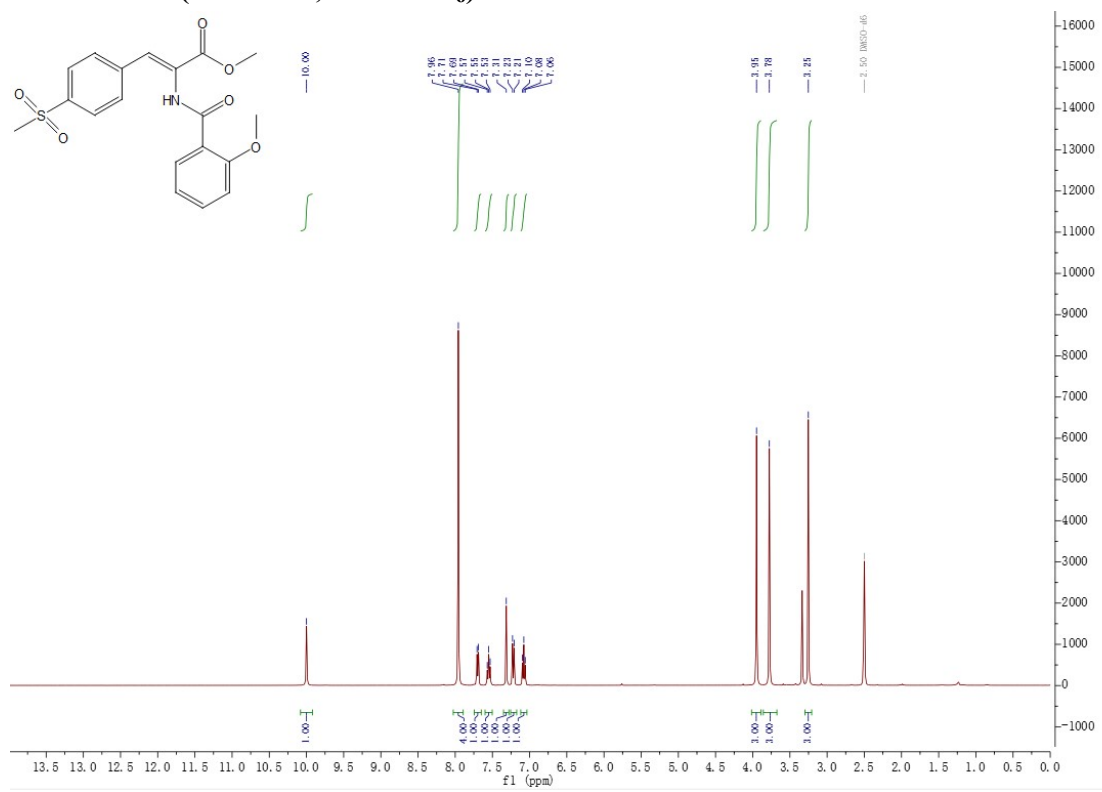

1b <sup>1</sup>H NMR (400 MHz, DMSO-d<sub>6</sub>)

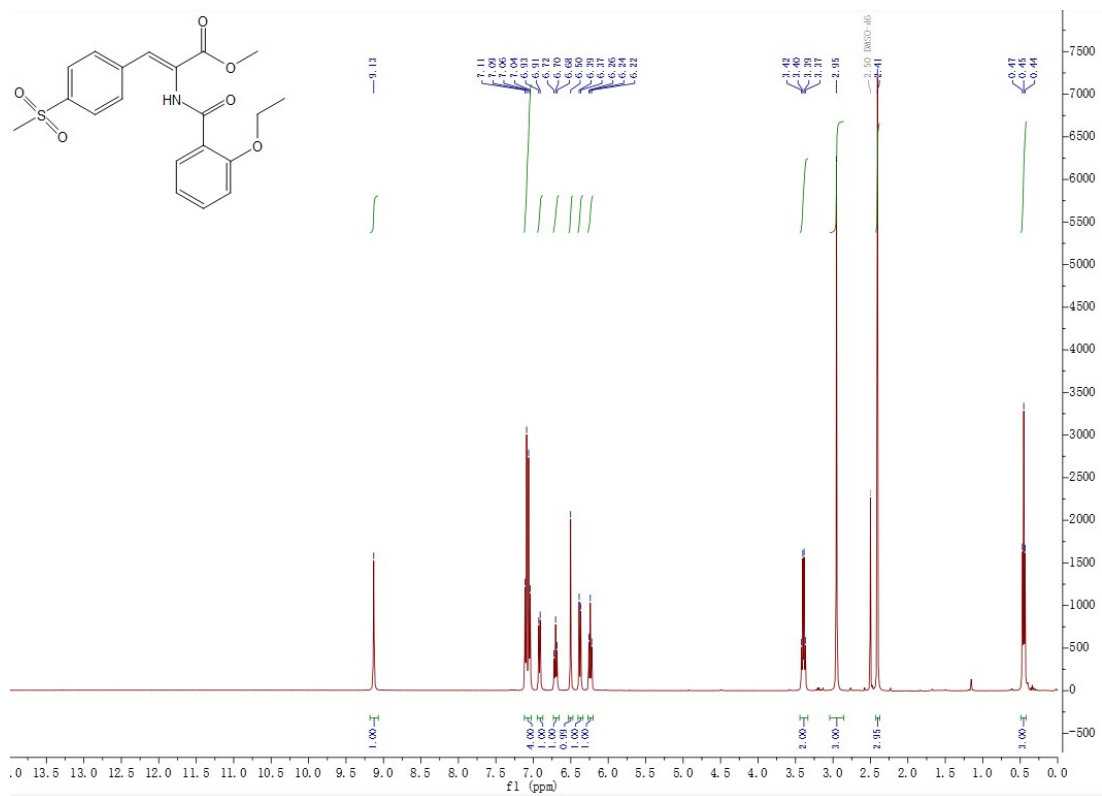

### 1c <sup>1</sup>H NMR (400 MHz, DMSO-d<sub>6</sub>)

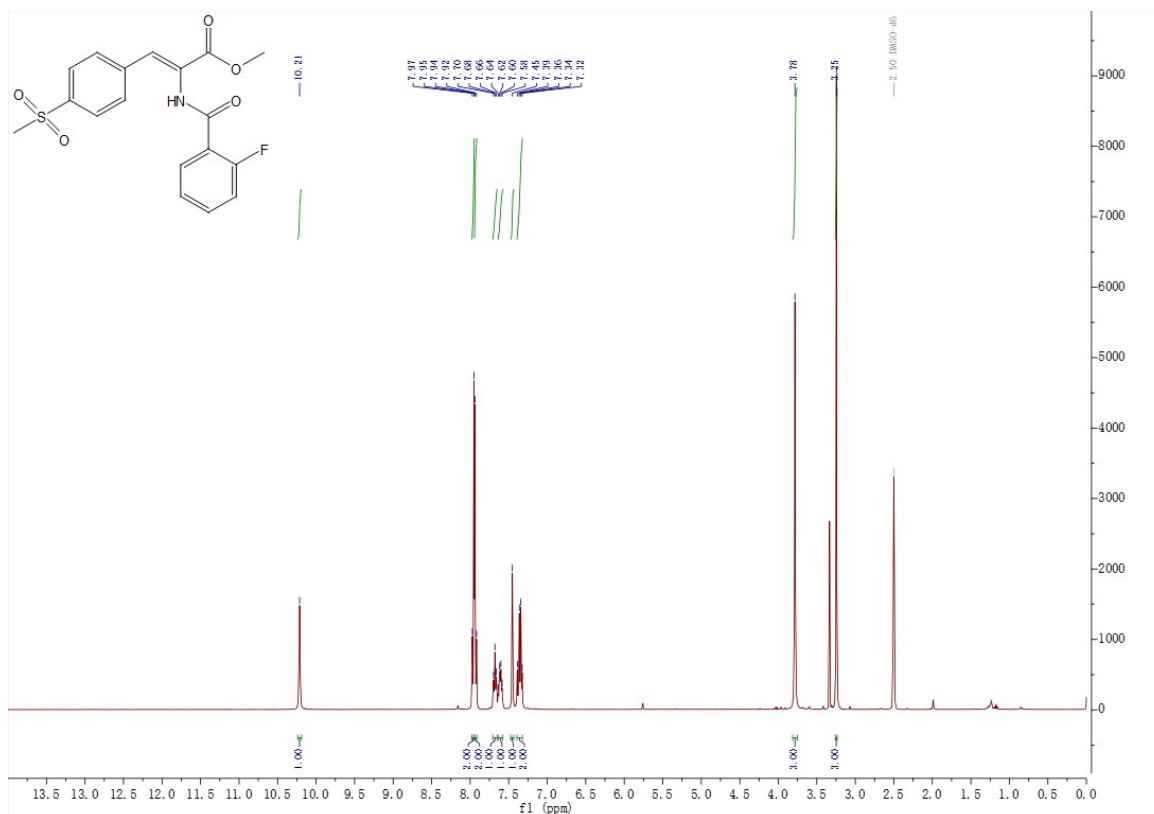

### 1d <sup>1</sup>H NMR (400 MHz, DMSO-d<sub>6</sub>)

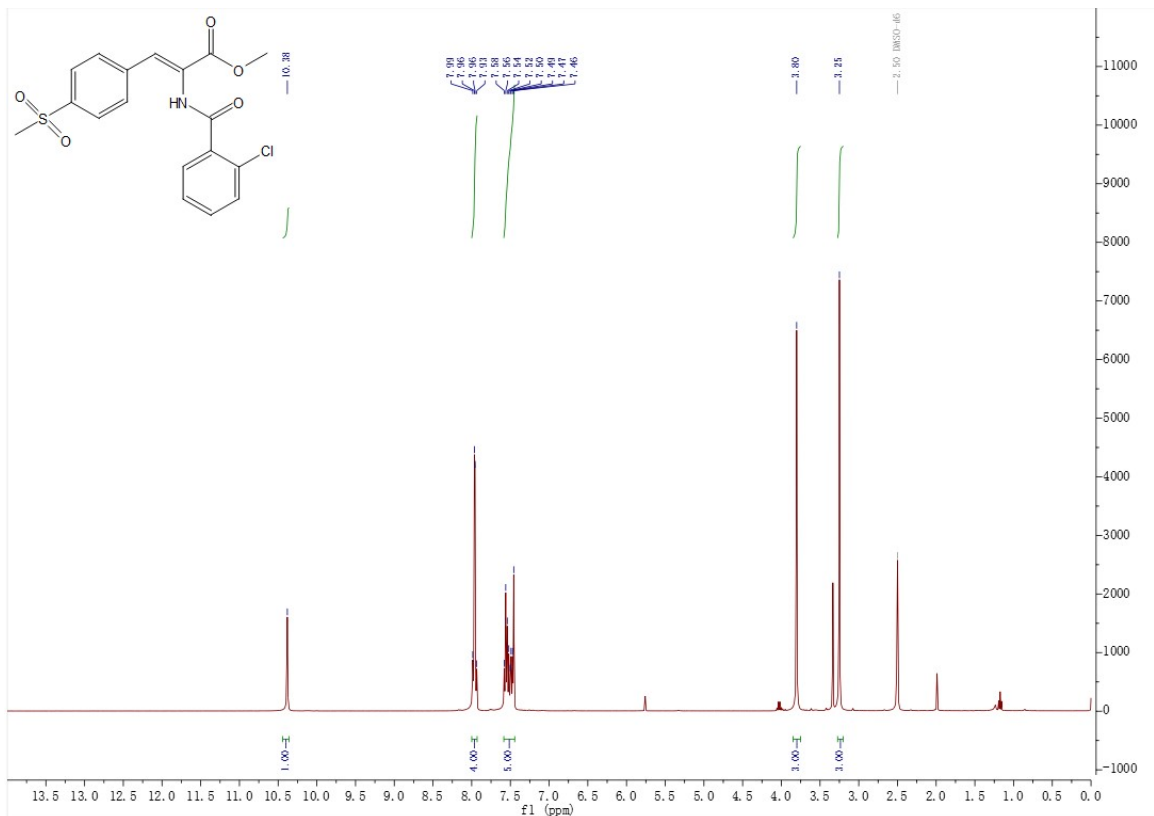



**1e <sup>1</sup>H NMR (400 MHz, DMSO-d<sub>6</sub>)**

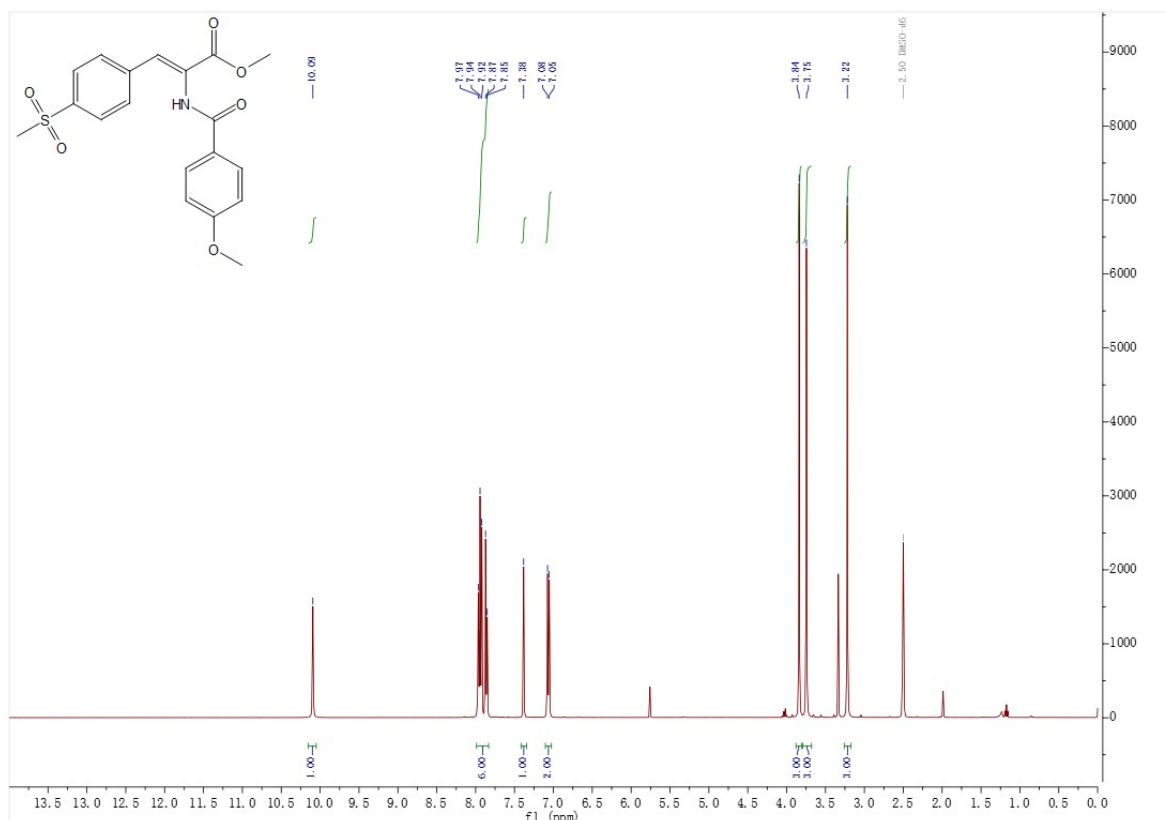

**1f <sup>1</sup>H NMR (400 MHz, DMSO-d<sub>6</sub>)**

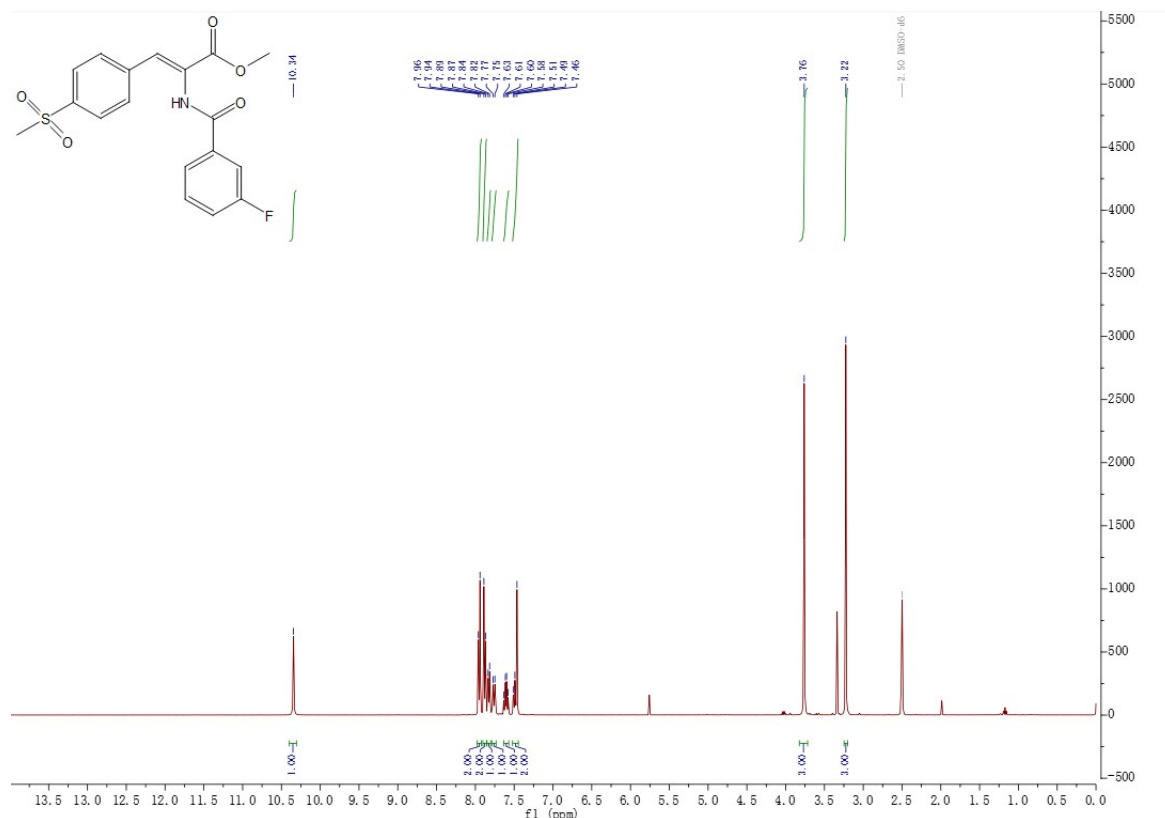

### 1g <sup>1</sup>H NMR (400 MHz, DMSO-d<sub>6</sub>)

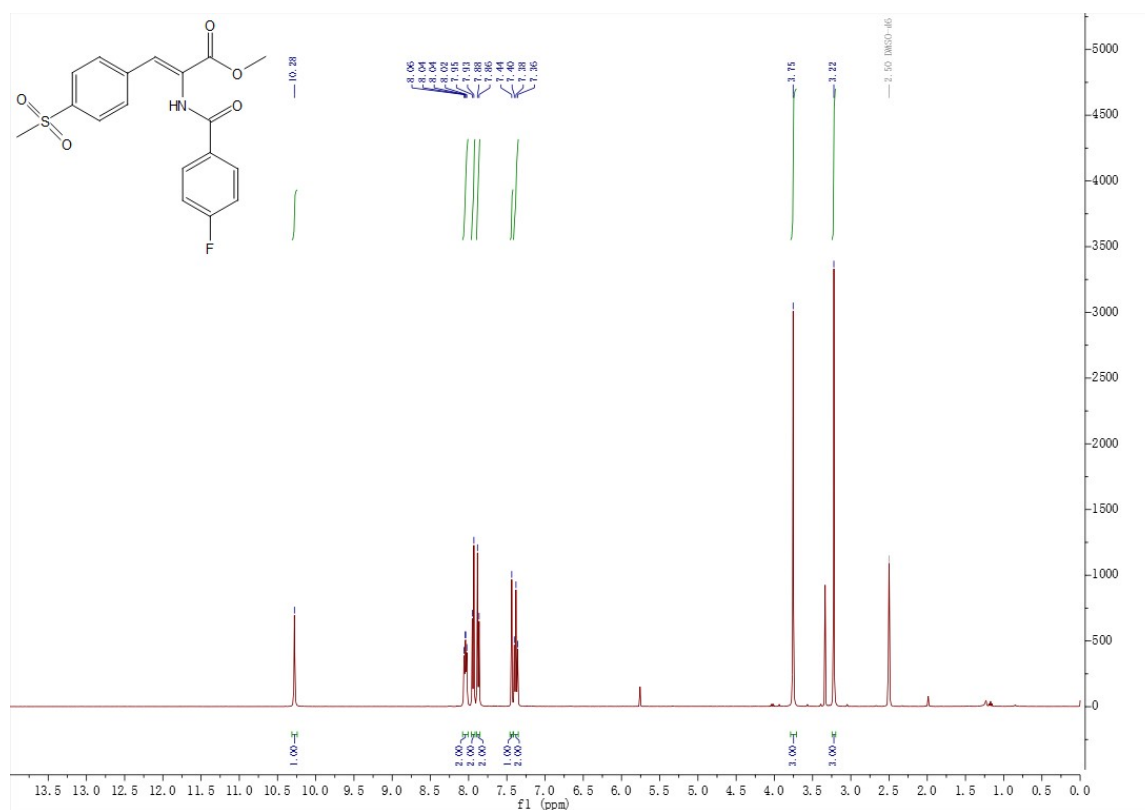

### 1h <sup>1</sup>H NMR (400 MHz, DMSO-d<sub>6</sub>)

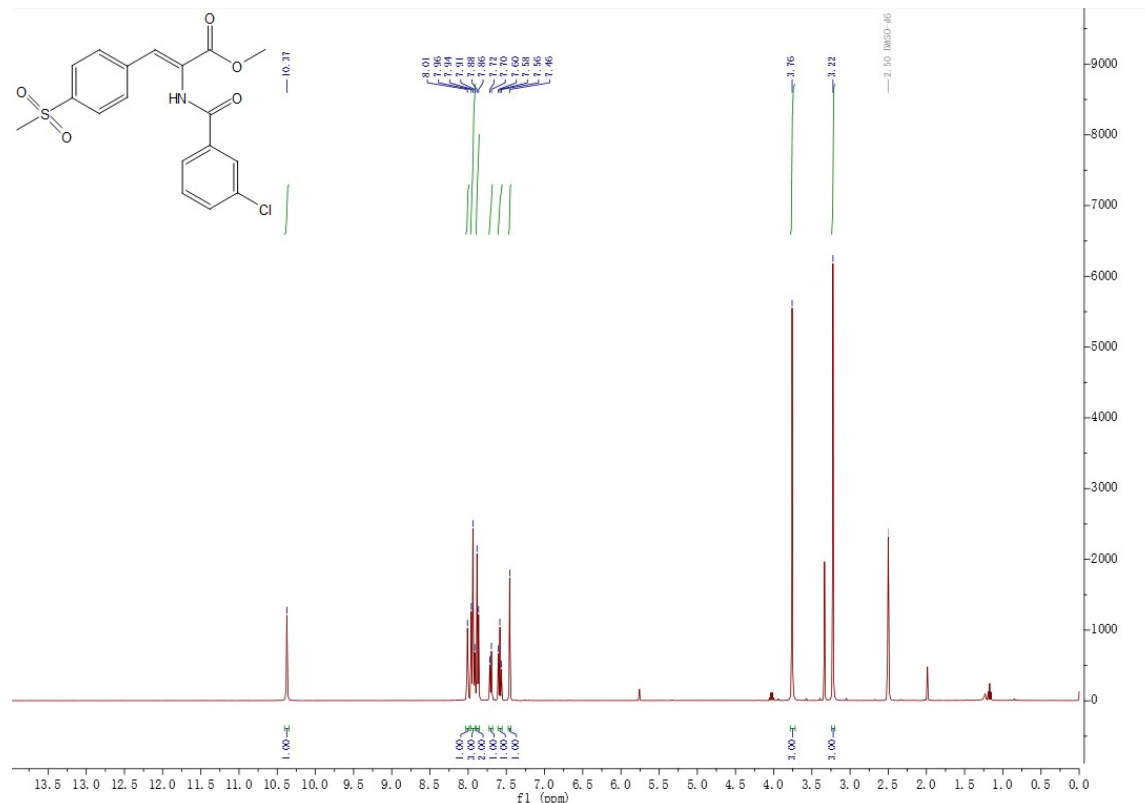

**1i**  $^1\text{H}$  NMR (400 MHz,  $\text{DMSO-d}_6$ )

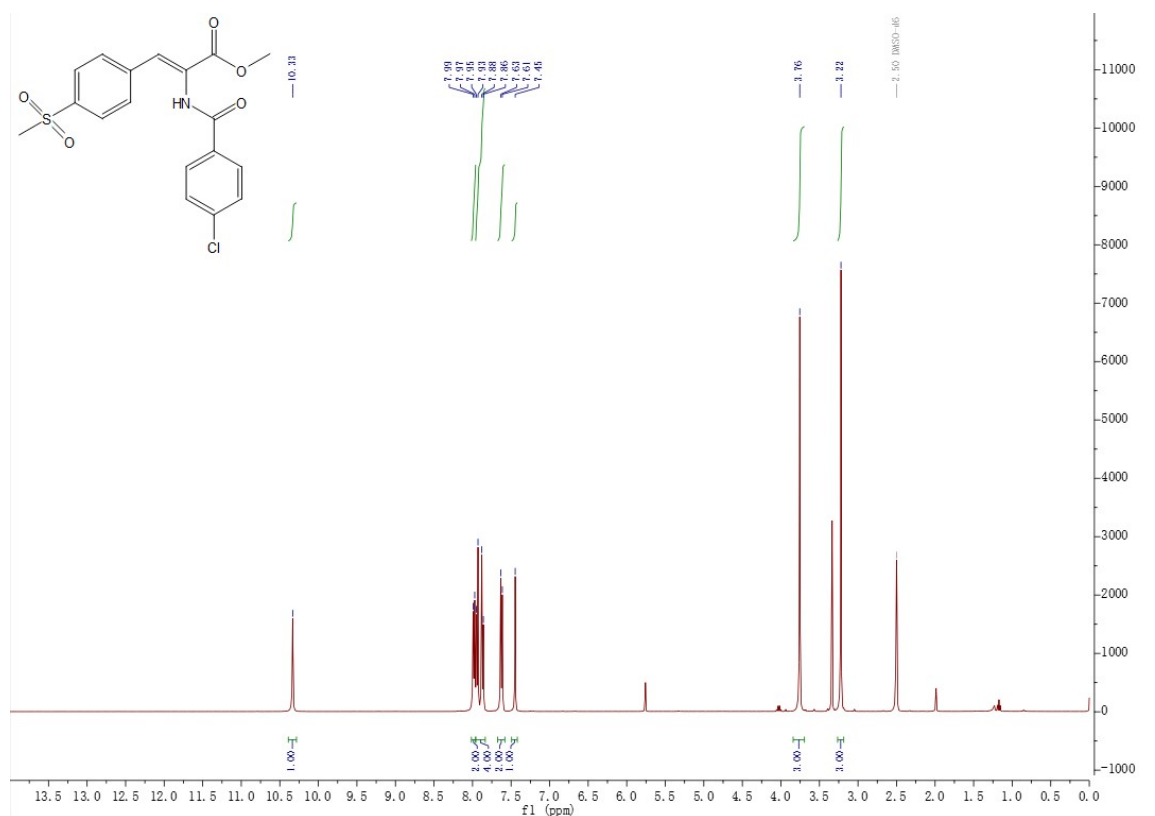

**1j**  $^1\text{H}$  NMR (400 MHz,  $\text{DMSO-d}_6$ )

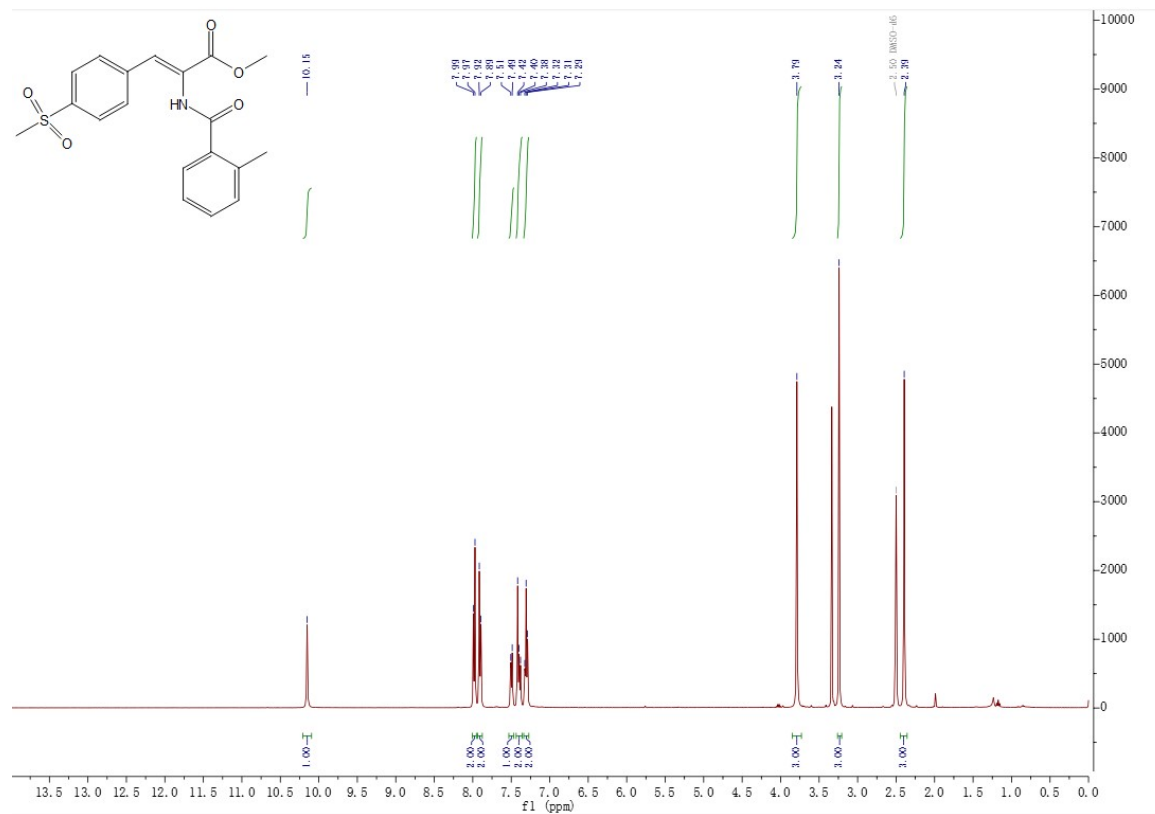

**1k <sup>1</sup>H NMR (400 MHz, DMSO-d<sub>6</sub>)**

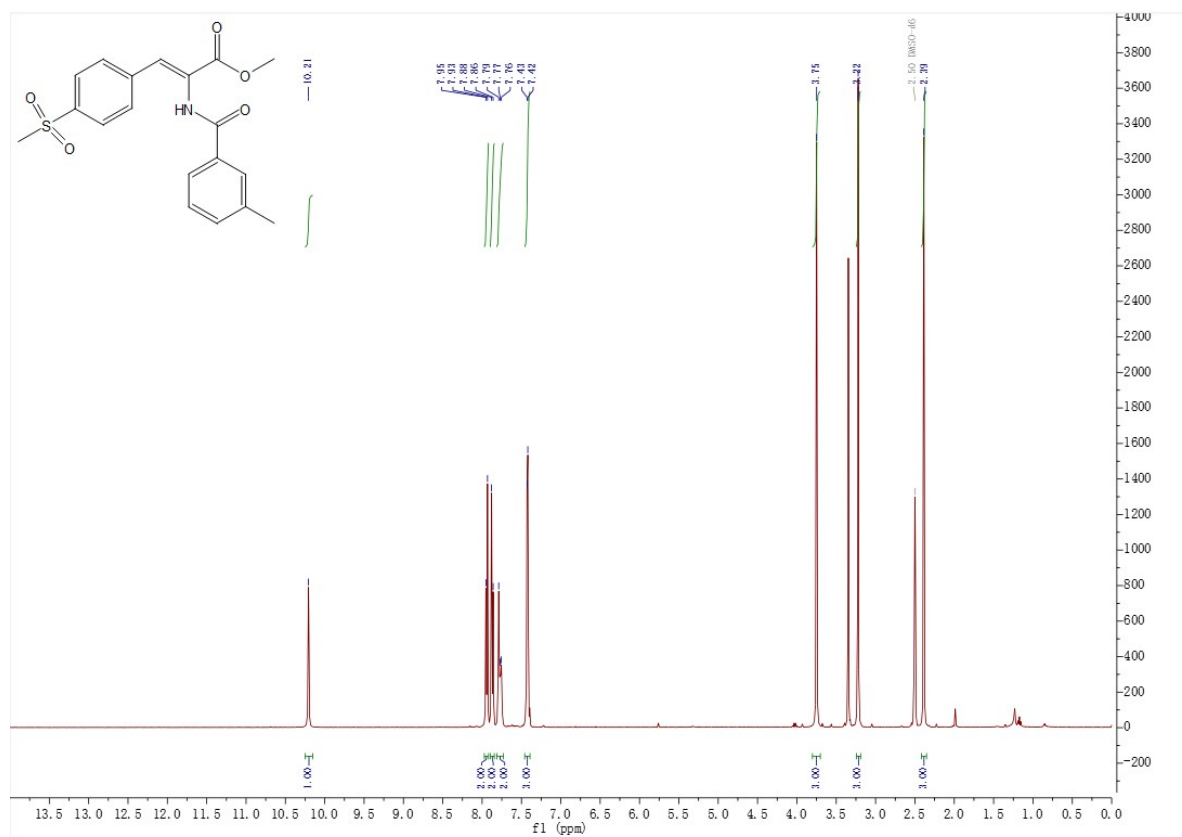

**11 <sup>1</sup>H NMR (400 MHz, DMSO-d<sub>6</sub>)**

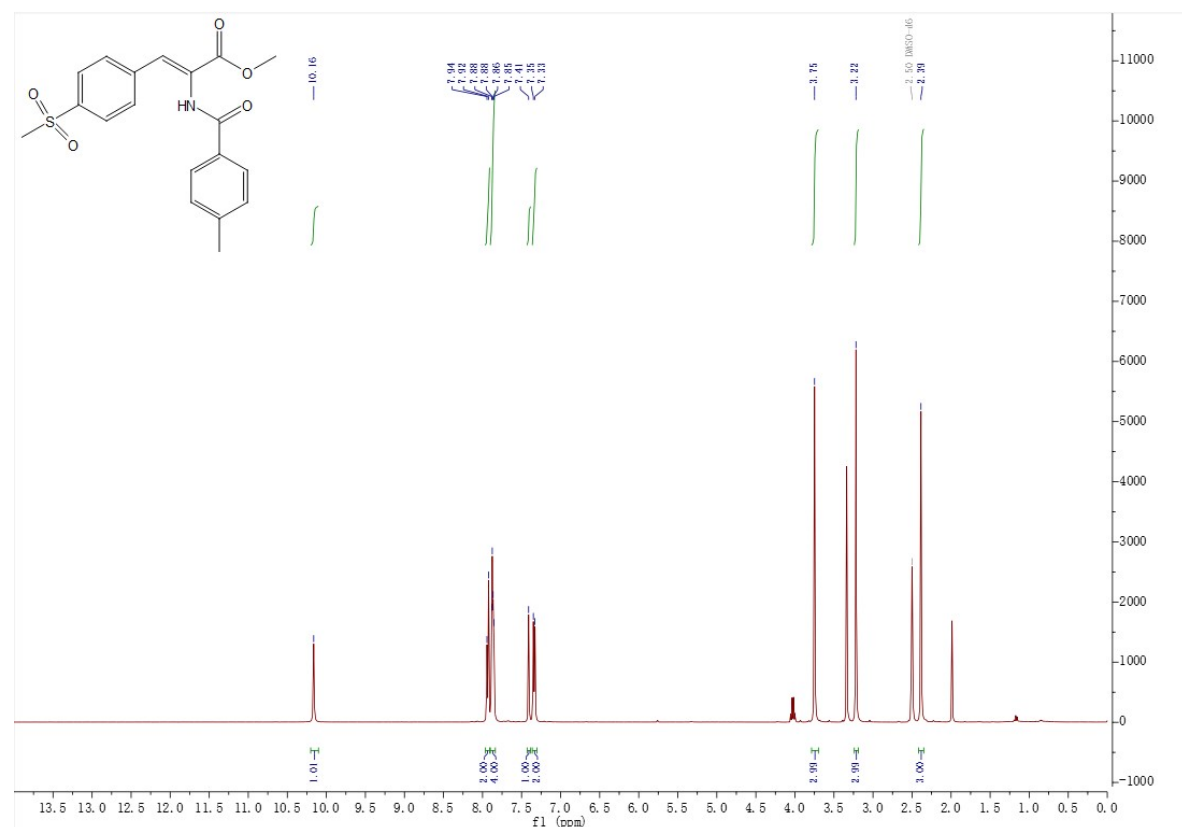

**1m <sup>1</sup>H NMR (400 MHz, DMSO-d<sub>6</sub>)**

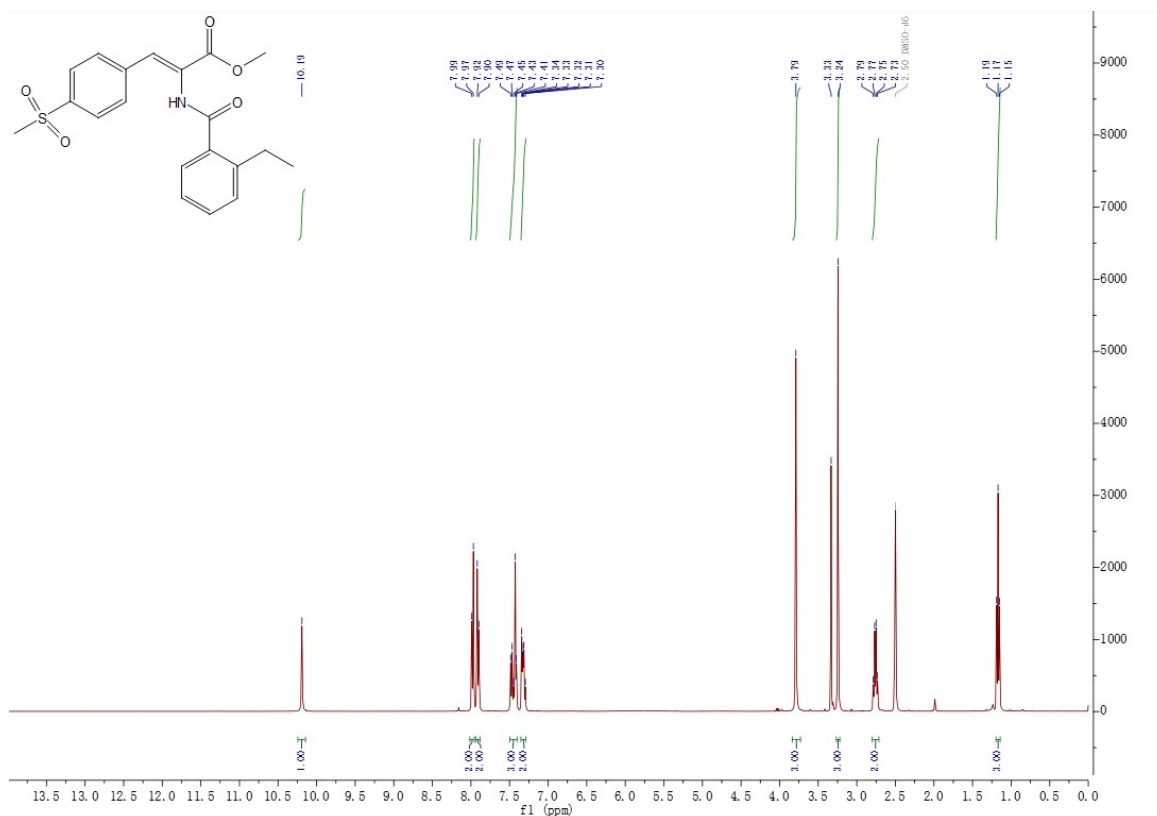

**1n <sup>1</sup>H NMR (400 MHz, DMSO-d<sub>6</sub>)**

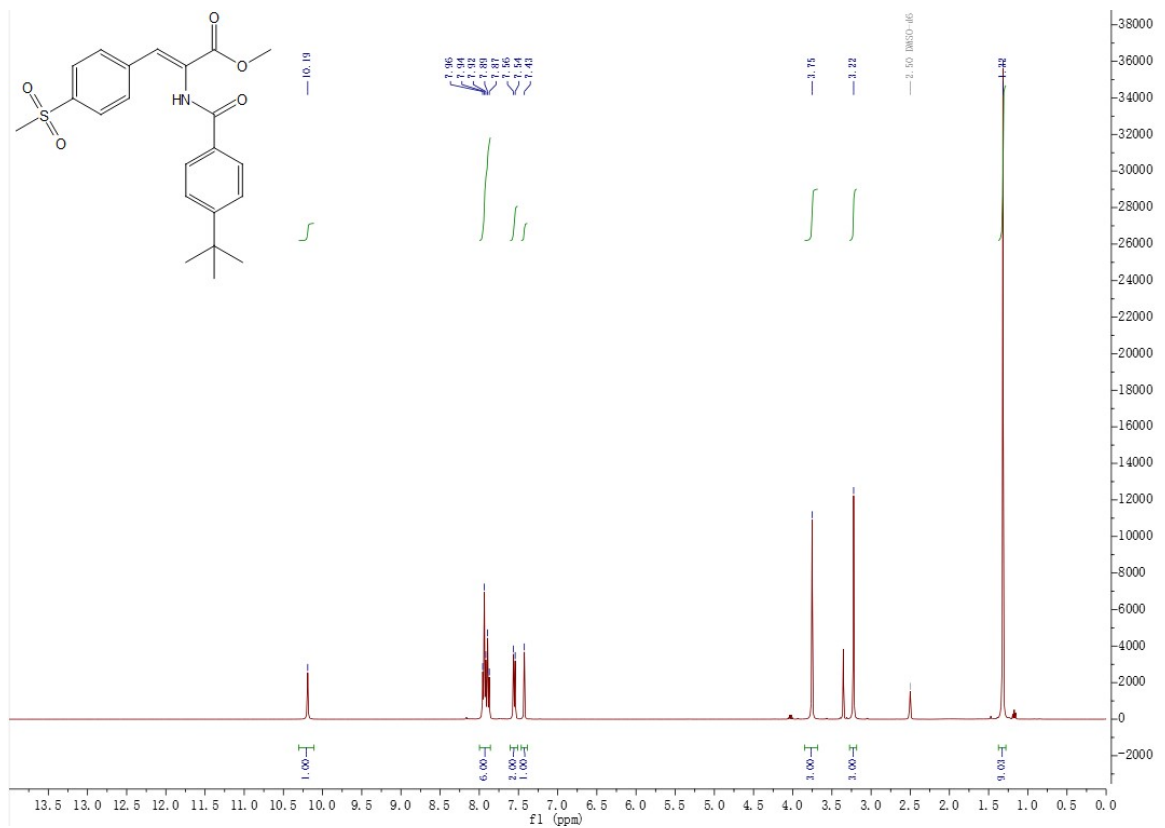

**1o <sup>1</sup>H NMR (400 MHz, DMSO-d<sub>6</sub>)**

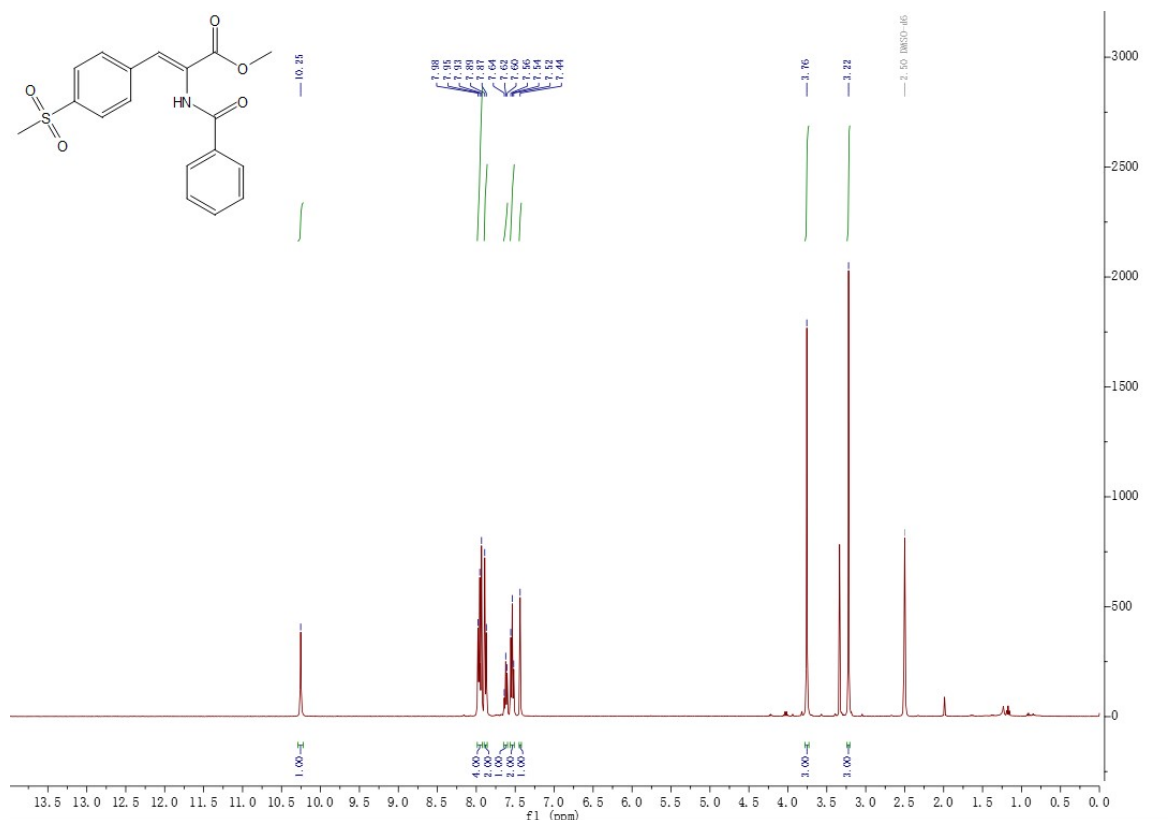

**1p <sup>1</sup>H NMR (400 MHz, DMSO-d<sub>6</sub>)**

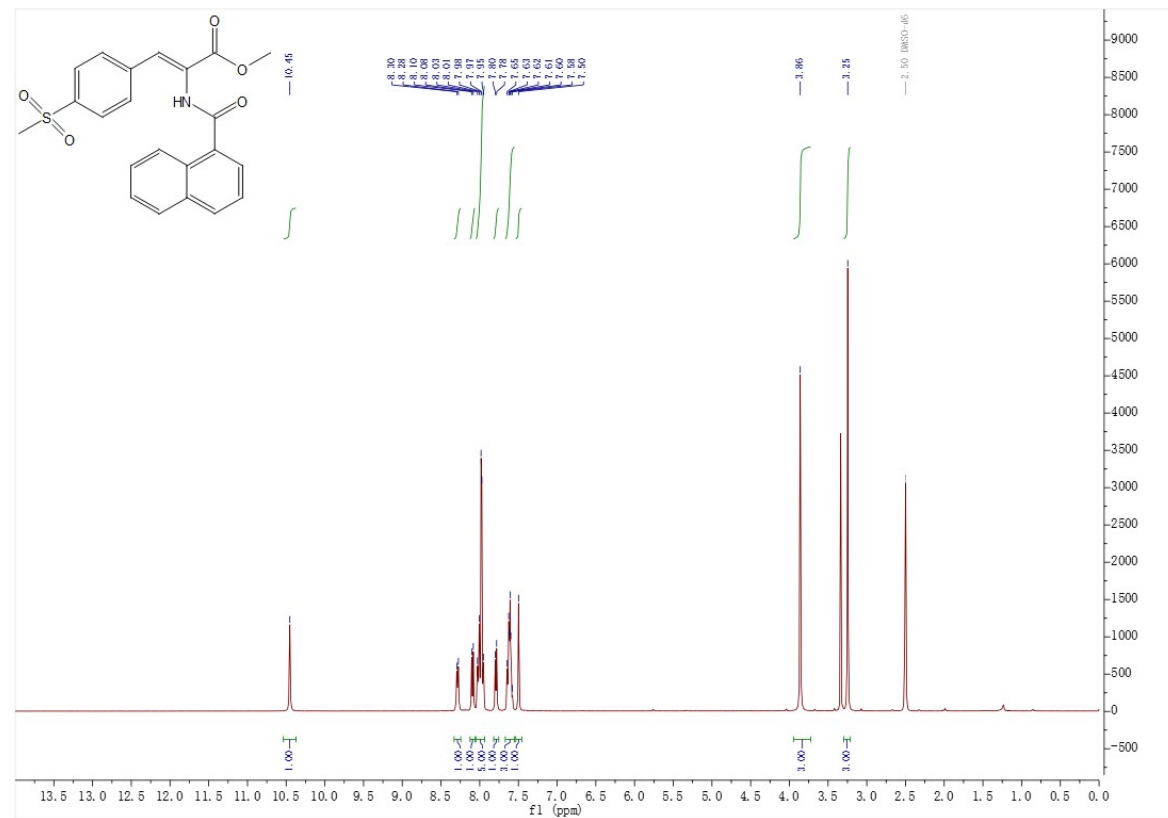

### 1q <sup>1</sup>H NMR (400 MHz, DMSO-d<sub>6</sub>)

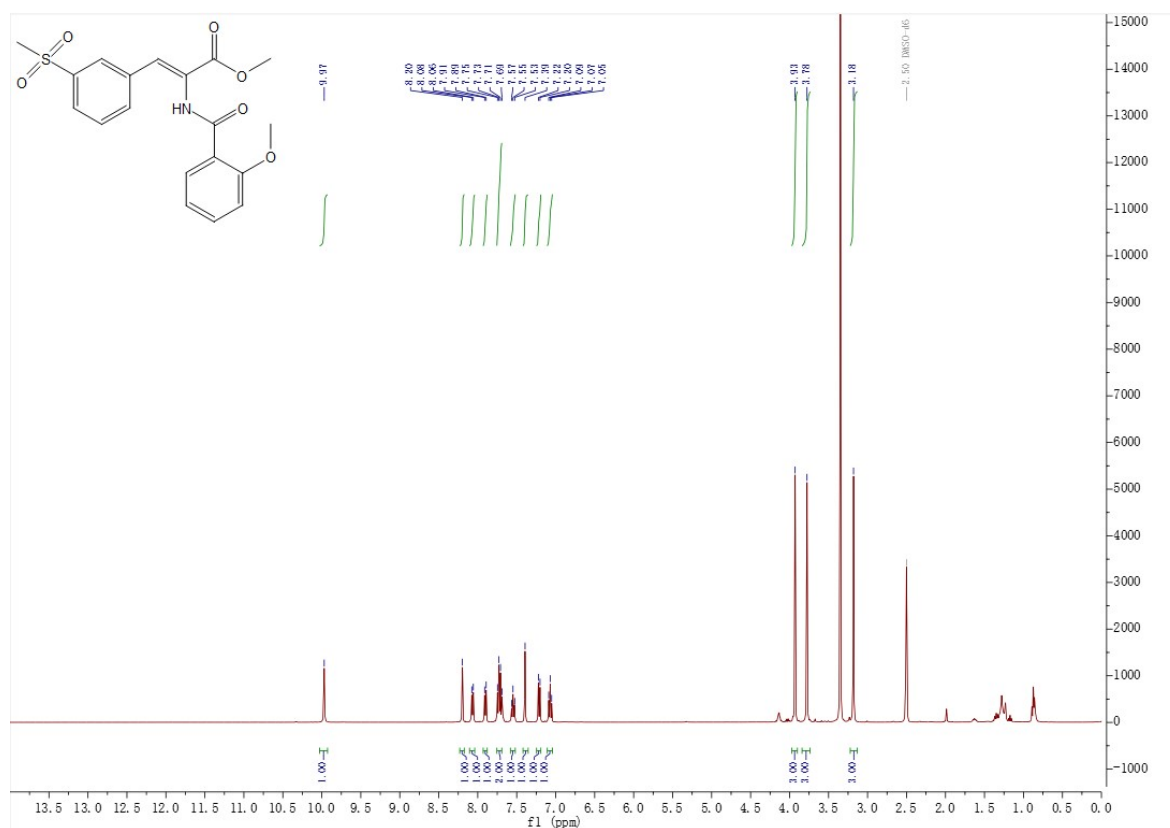

### 1r <sup>1</sup>H NMR (400 MHz, DMSO-d<sub>6</sub>)

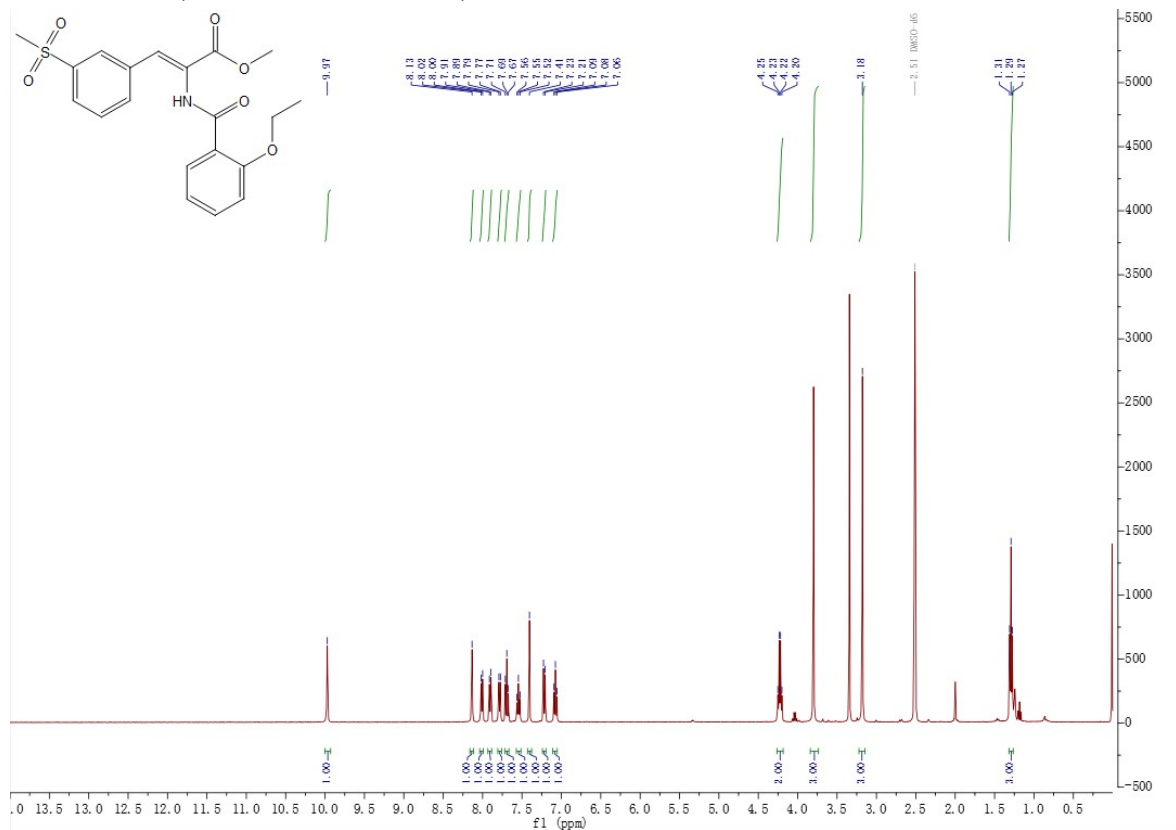

**2a <sup>1</sup>H NMR (400 MHz, CDCl<sub>3</sub>)**

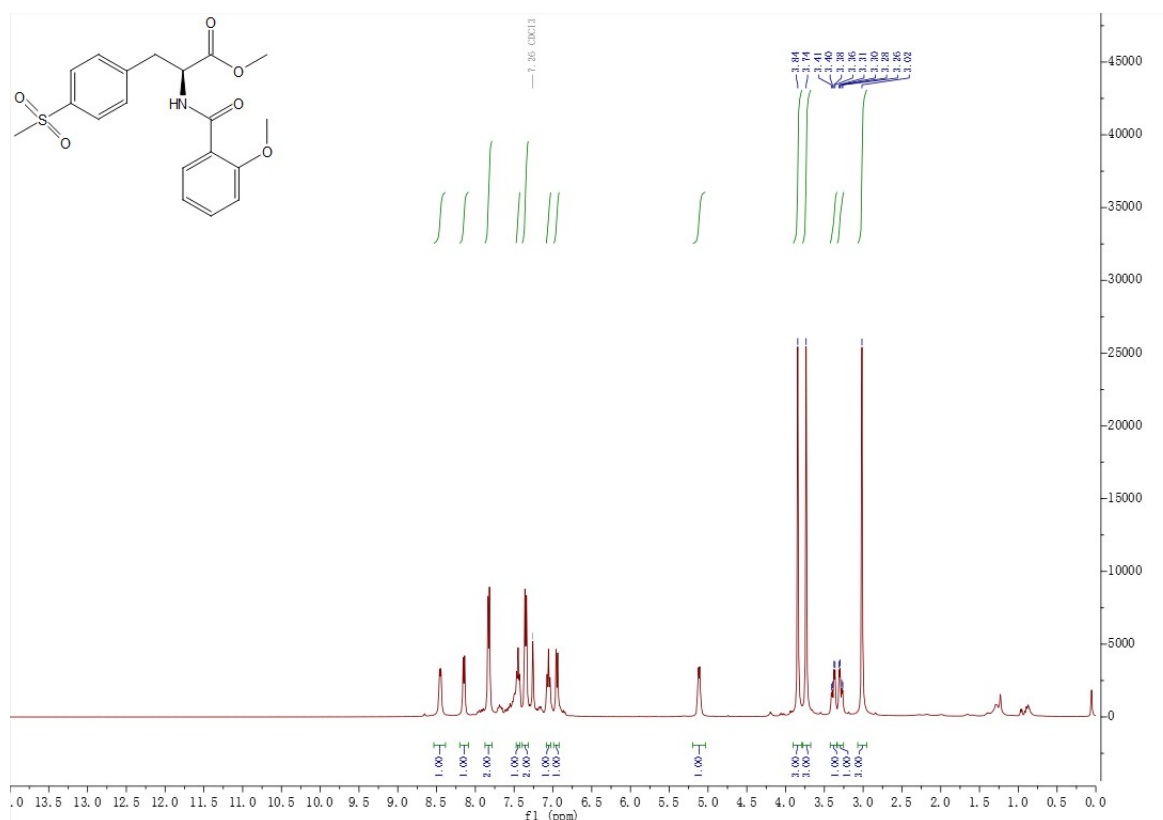

**2a <sup>13</sup>C{<sup>1</sup>H} NMR (101 MHz, CDCl<sub>3</sub>)**

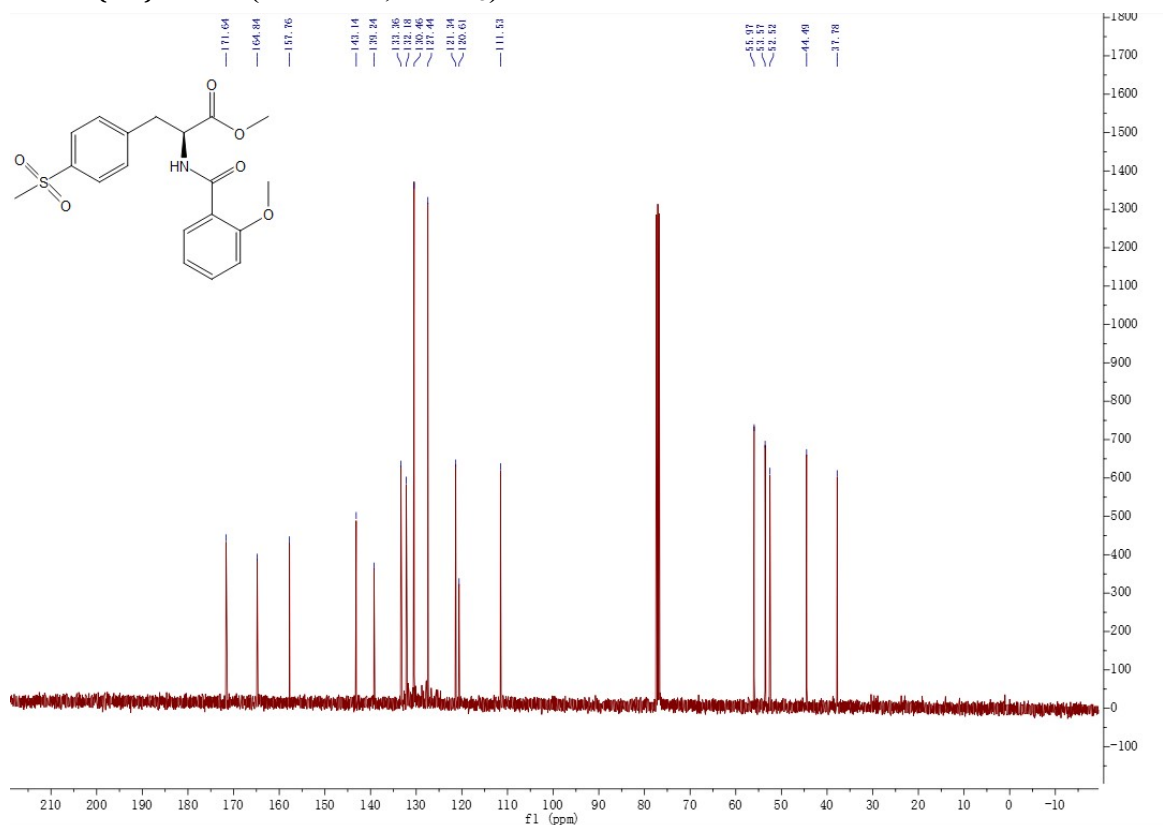



**2b <sup>1</sup>H NMR (400 MHz, CDCl<sub>3</sub>)**

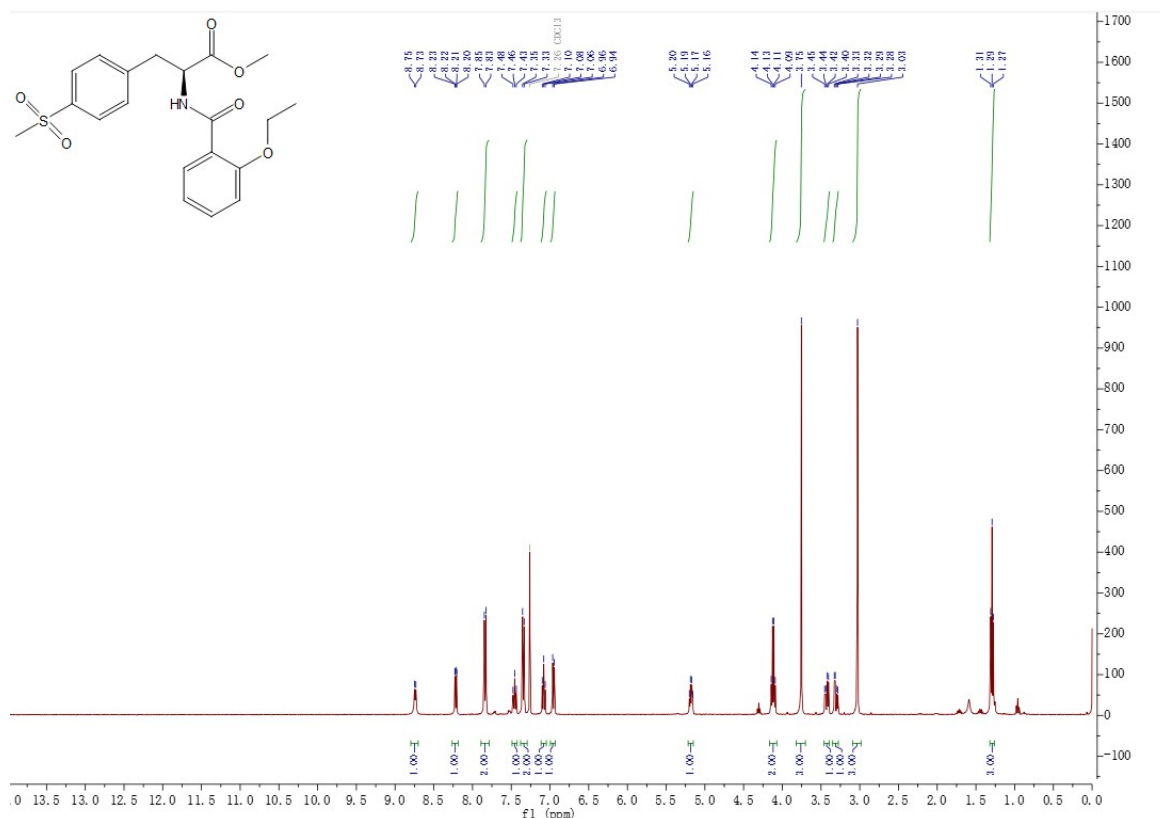

**2b <sup>13</sup>C NMR (101 MHz, CDCl<sub>3</sub>)**

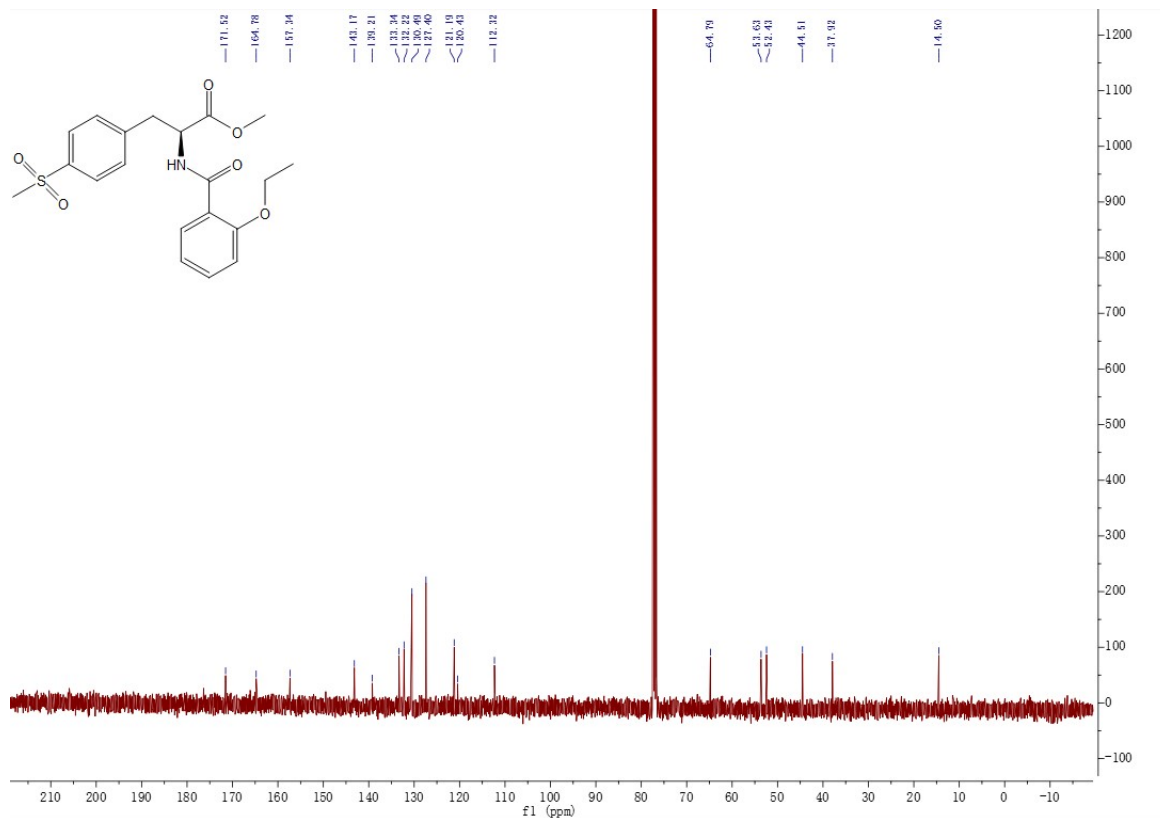

### 2c <sup>1</sup>H NMR (400 MHz, CDCl<sub>3</sub>)

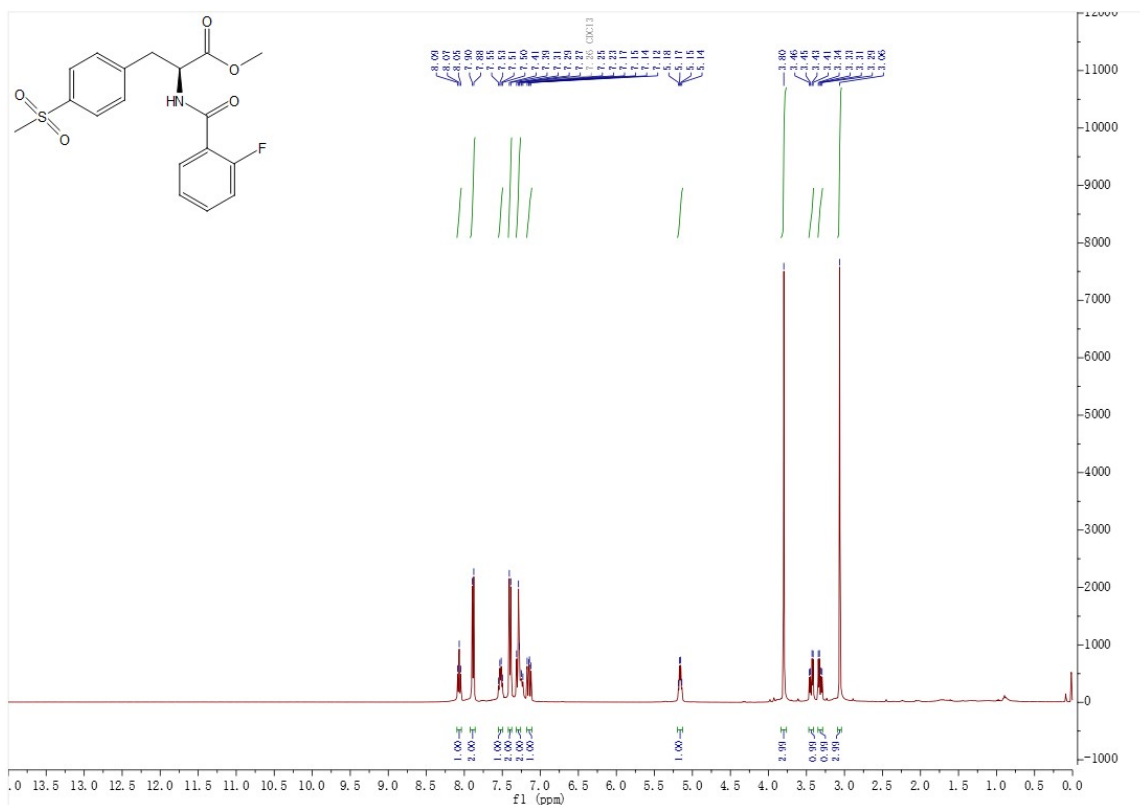

### 2c <sup>13</sup>C NMR (101 MHz, CDCl<sub>3</sub>)

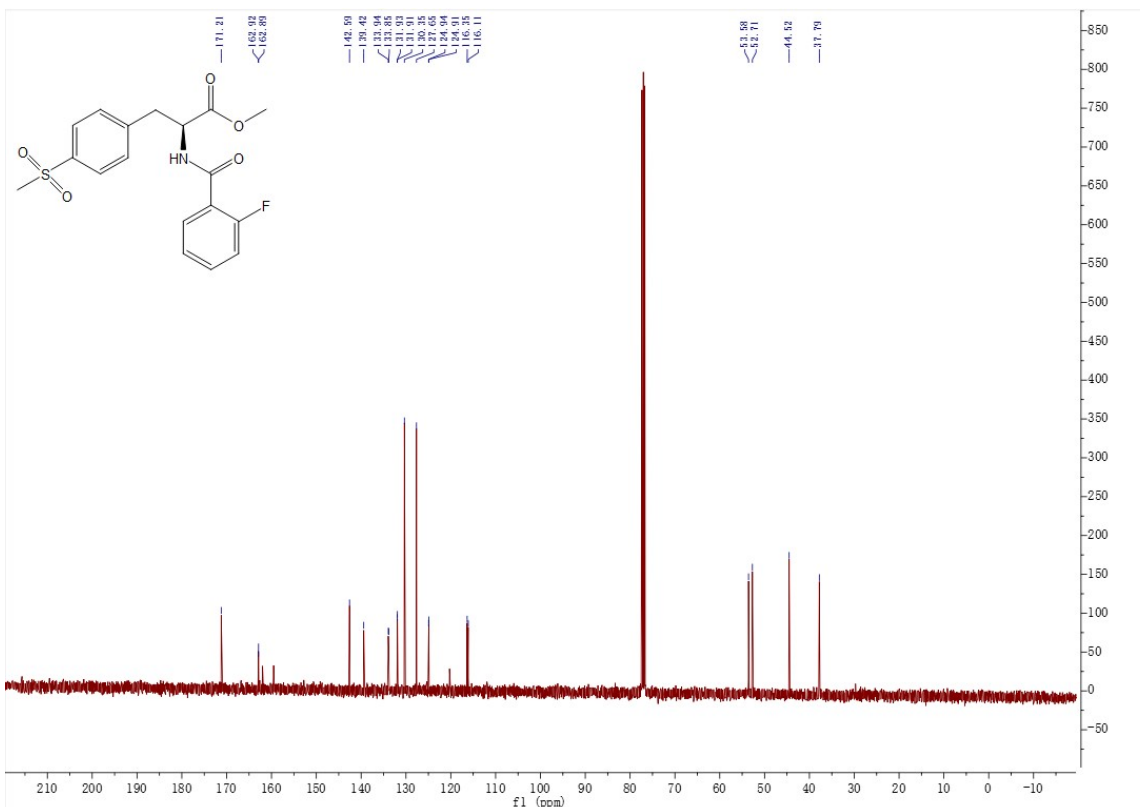

## 2d <sup>1</sup>H NMR (400 MHz, CDCl<sub>3</sub>)

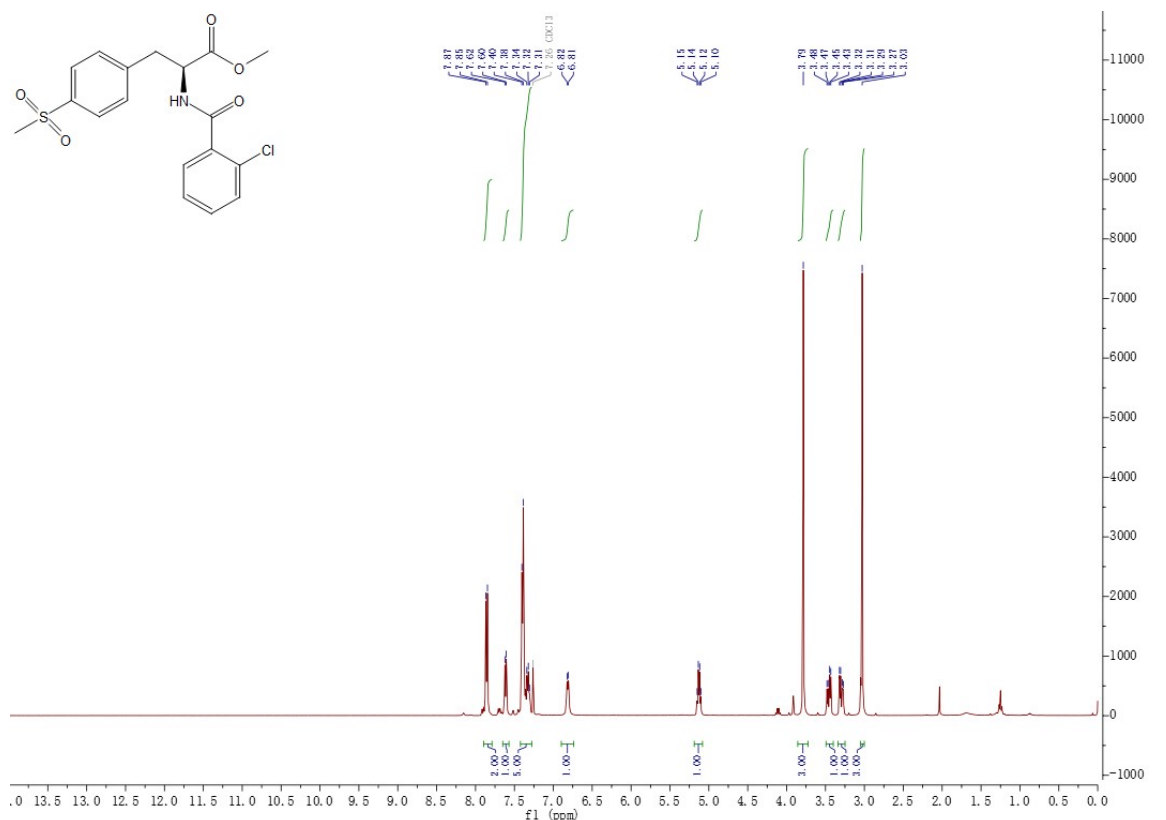

## 2d <sup>13</sup>C NMR (101 MHz, CDCl<sub>3</sub>)

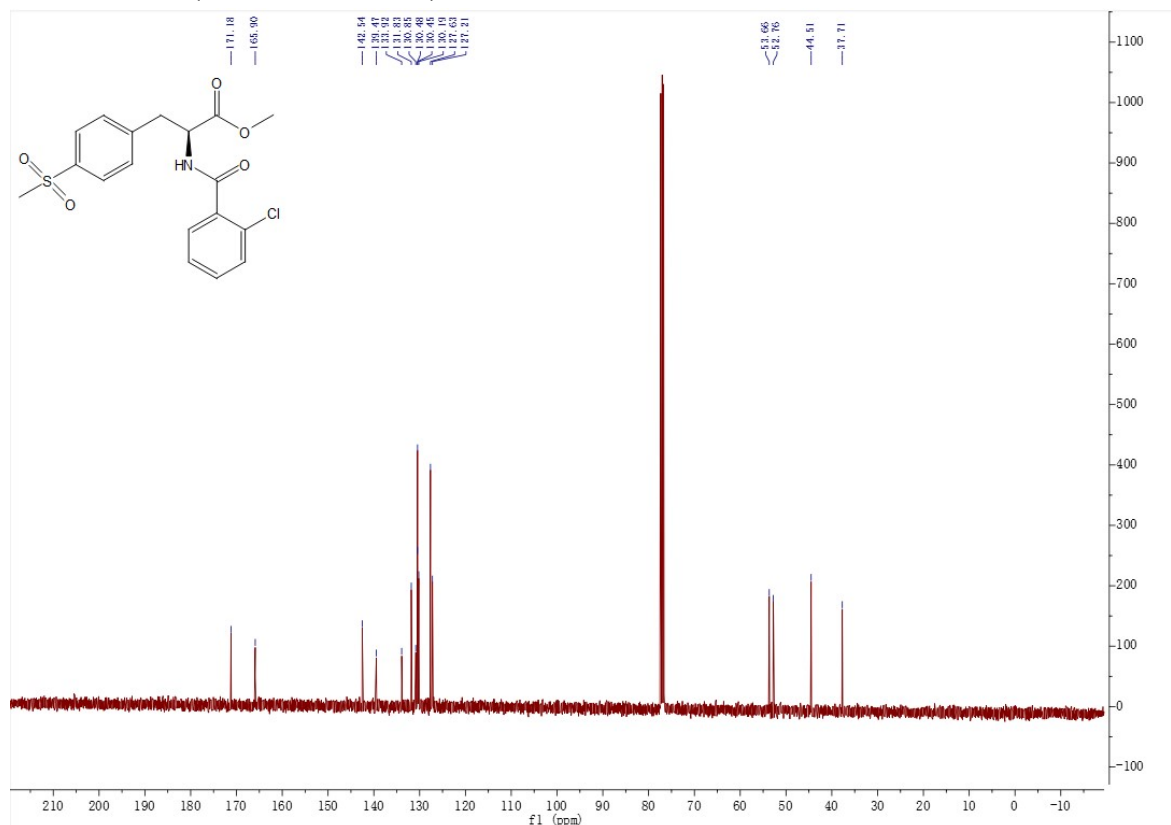

### 2e <sup>1</sup>H NMR (400 MHz, CDCl<sub>3</sub>)

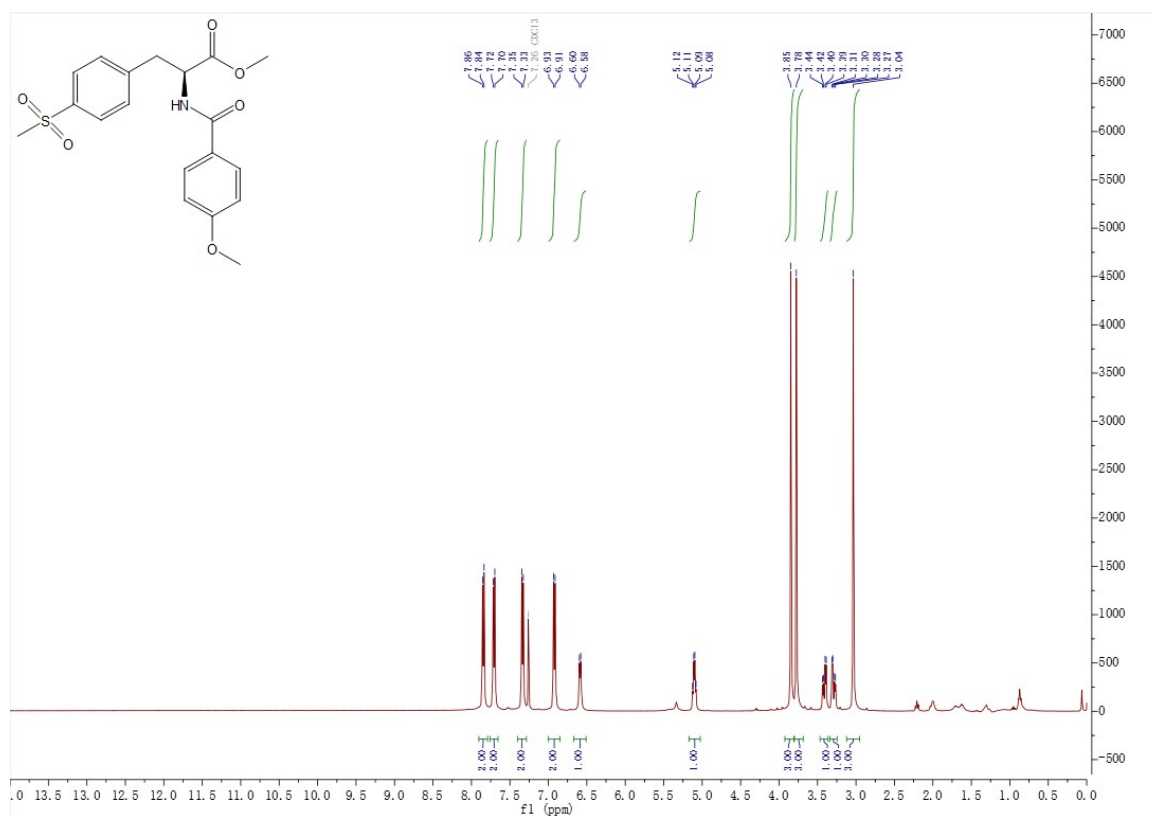

### 2e <sup>13</sup>C NMR (101 MHz, CDCl<sub>3</sub>)

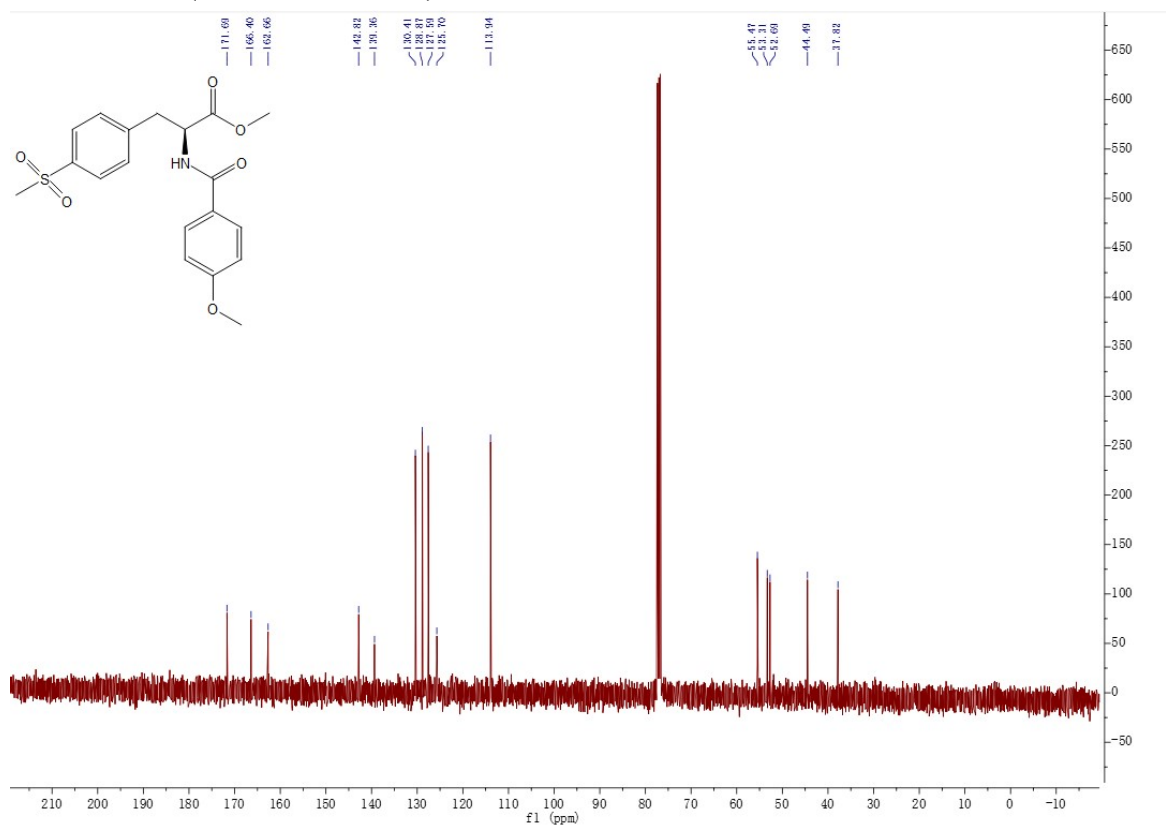

**2f <sup>1</sup>H NMR (400 MHz, CDCl<sub>3</sub>)**

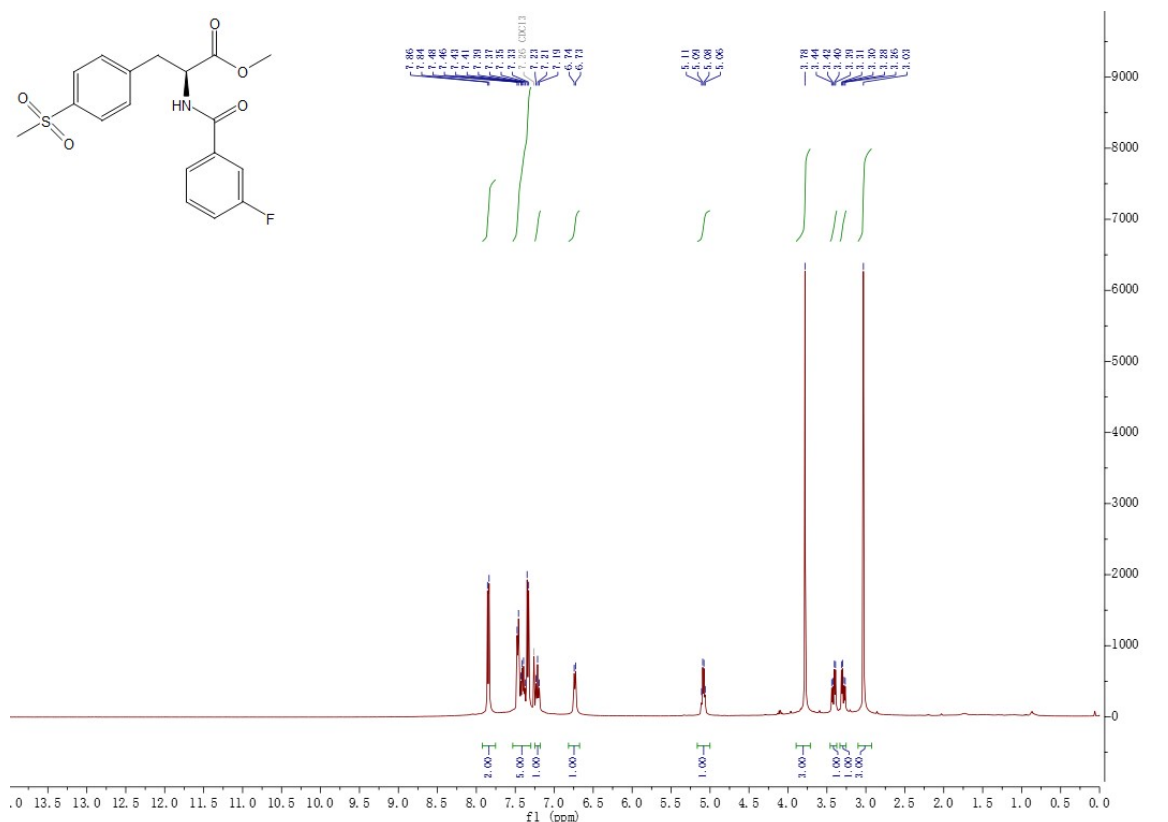

**2f <sup>13</sup>C NMR (101 MHz, CDCl<sub>3</sub>)**

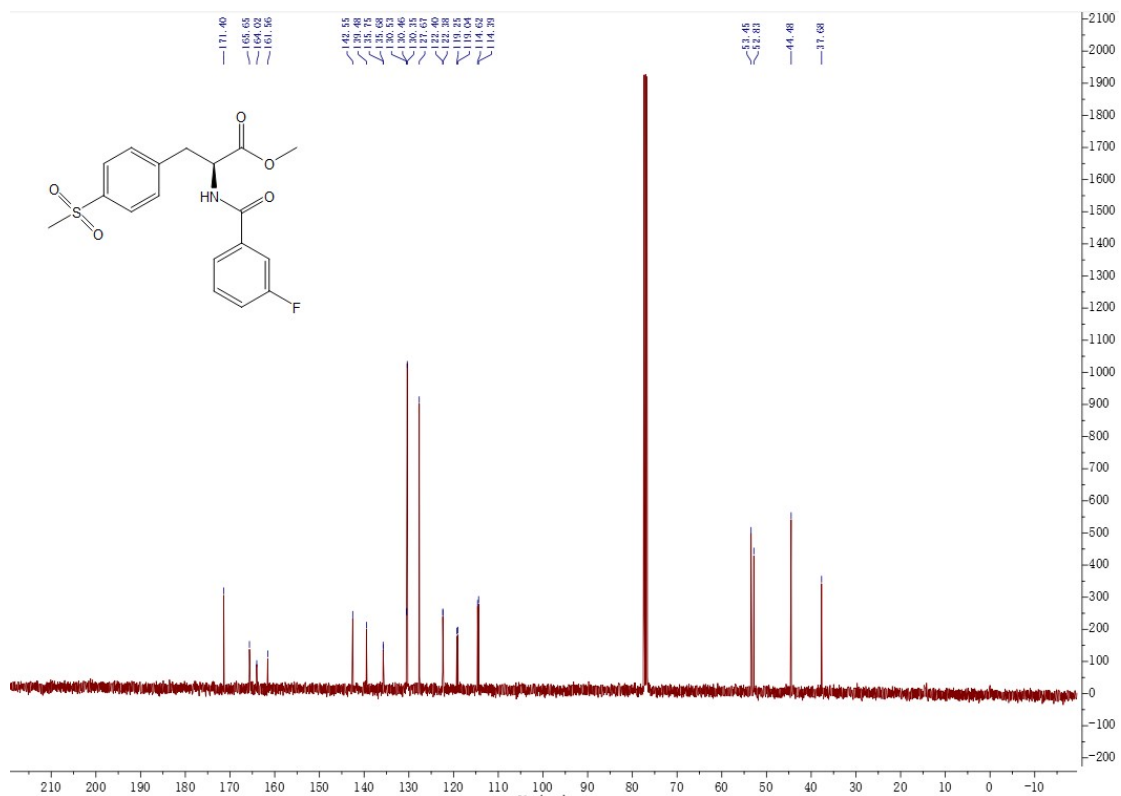

**2g <sup>1</sup>H NMR (400 MHz, CDCl<sub>3</sub>)**

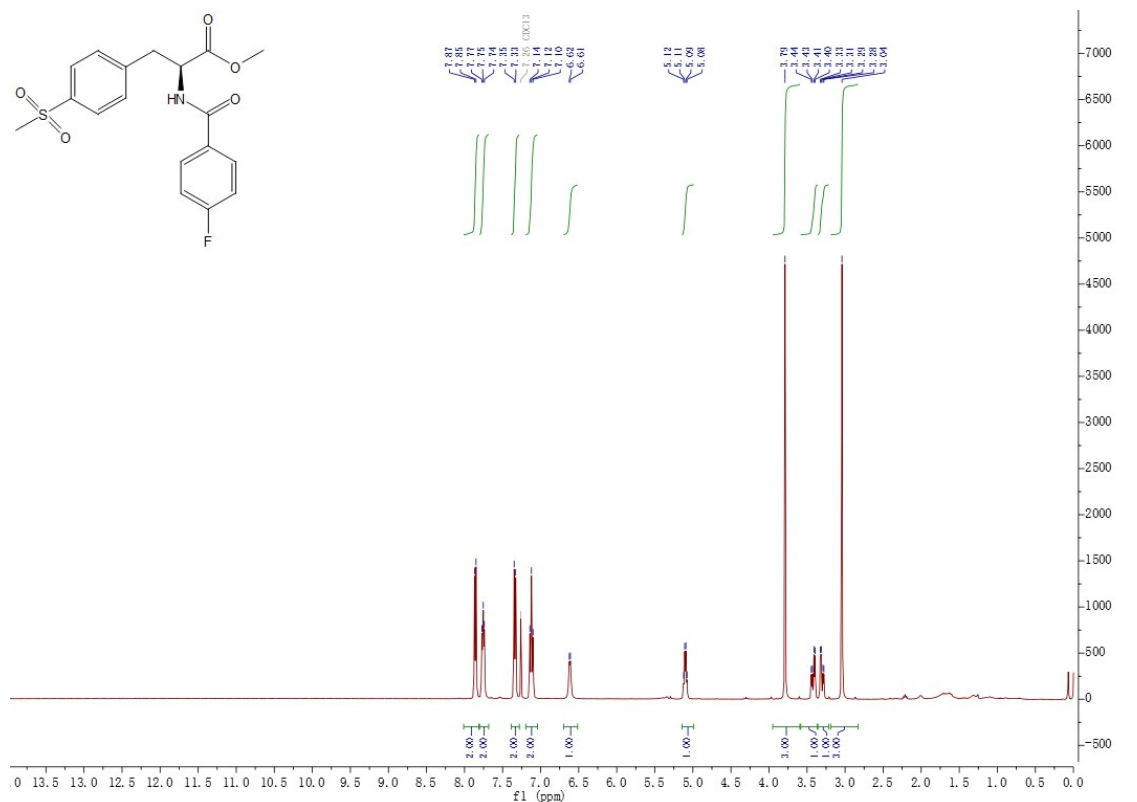

**2g <sup>13</sup>C NMR (101 MHz, CDCl<sub>3</sub>)**

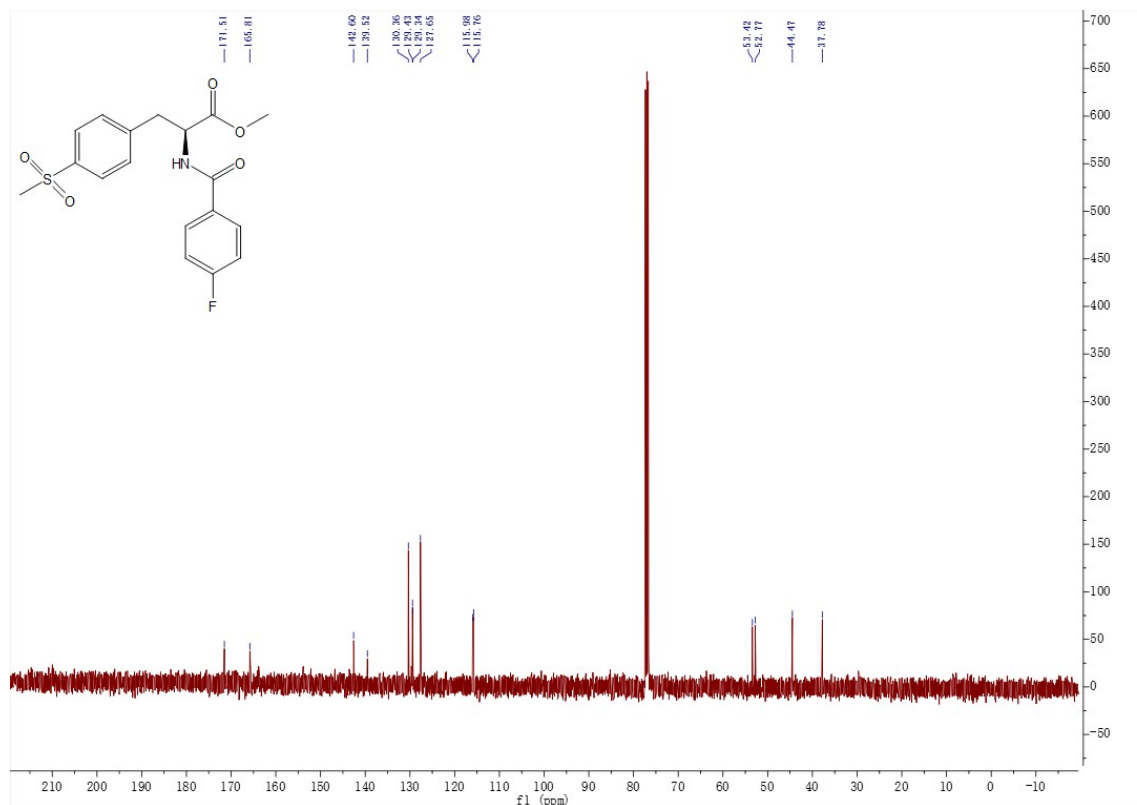

**2h <sup>1</sup>H NMR (400 MHz, CDCl<sub>3</sub>)**

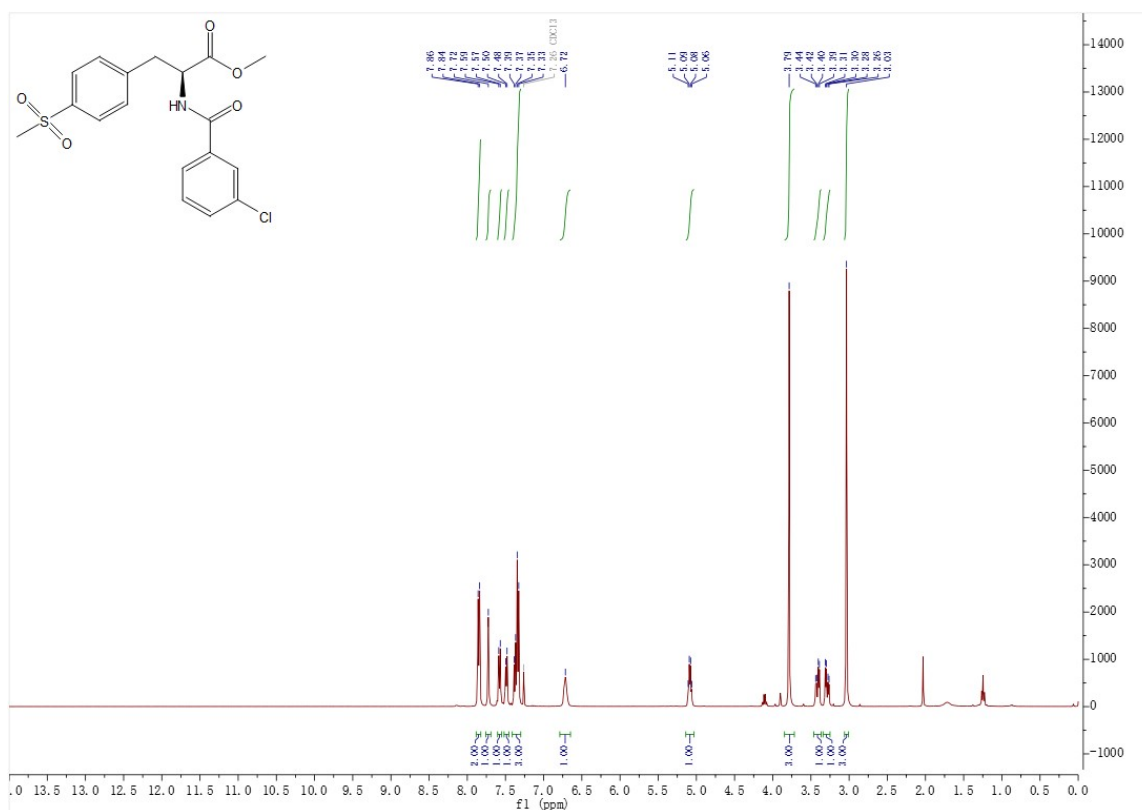

**2h <sup>13</sup>C NMR (101 MHz, CDCl<sub>3</sub>)**

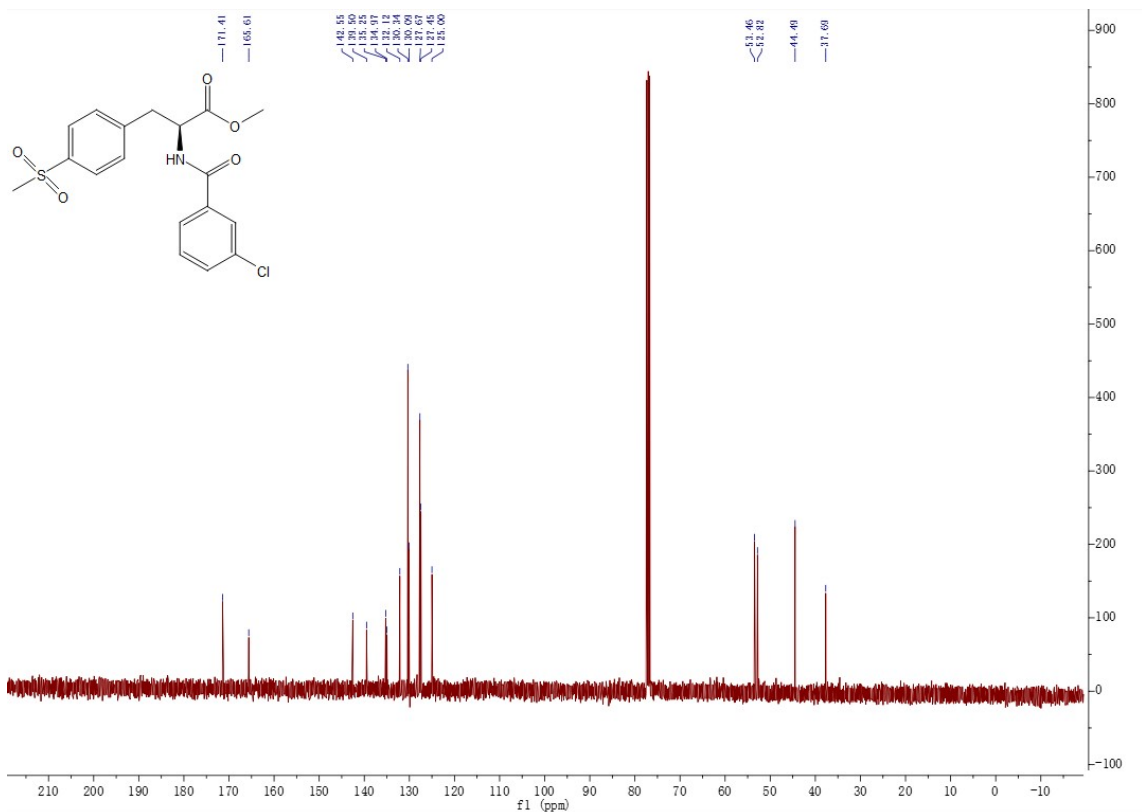

## 2i <sup>1</sup>H NMR (400 MHz, CDCl<sub>3</sub>)

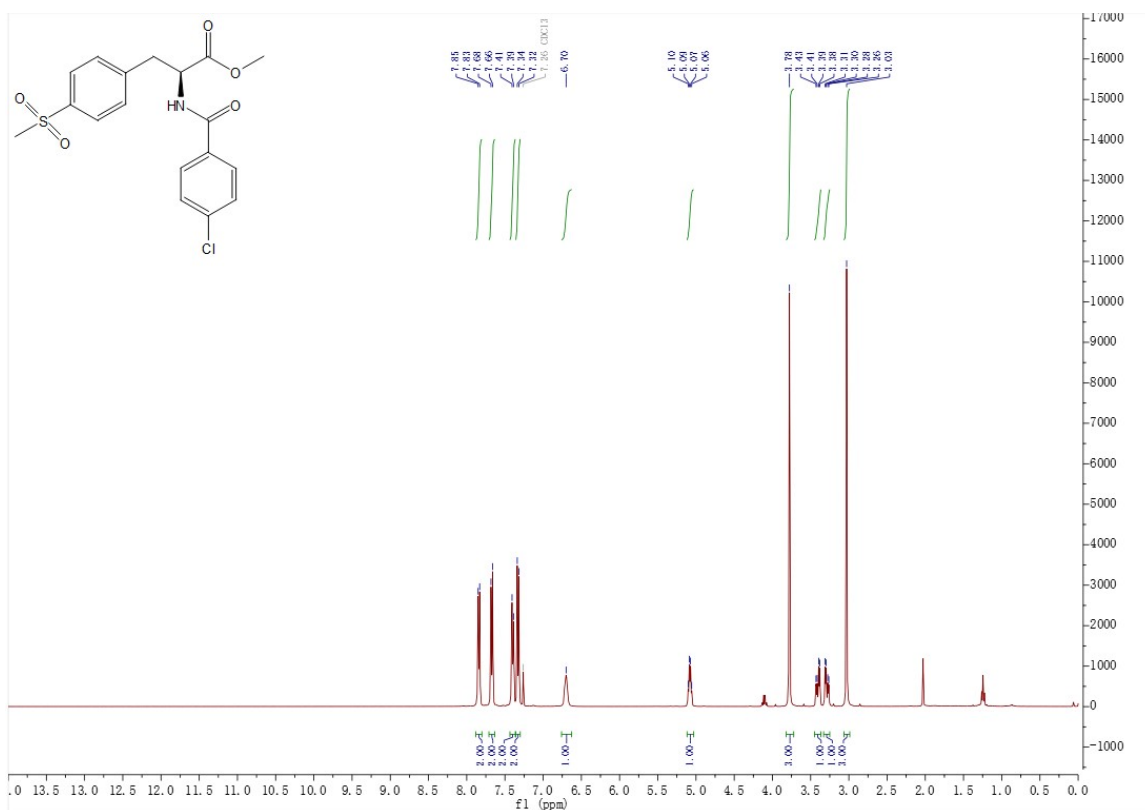

## 2i <sup>13</sup>C NMR (101 MHz, CDCl<sub>3</sub>)

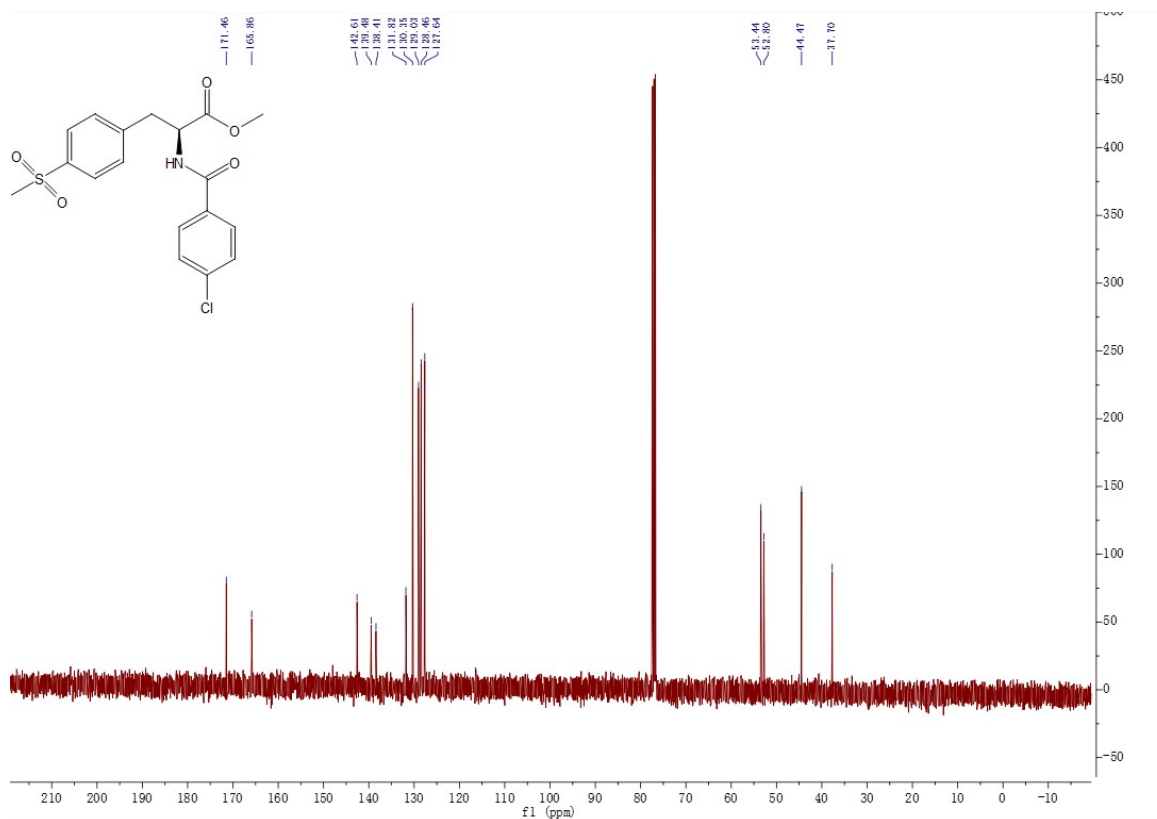



**2j <sup>1</sup>H NMR (400 MHz, CDCl<sub>3</sub>)**

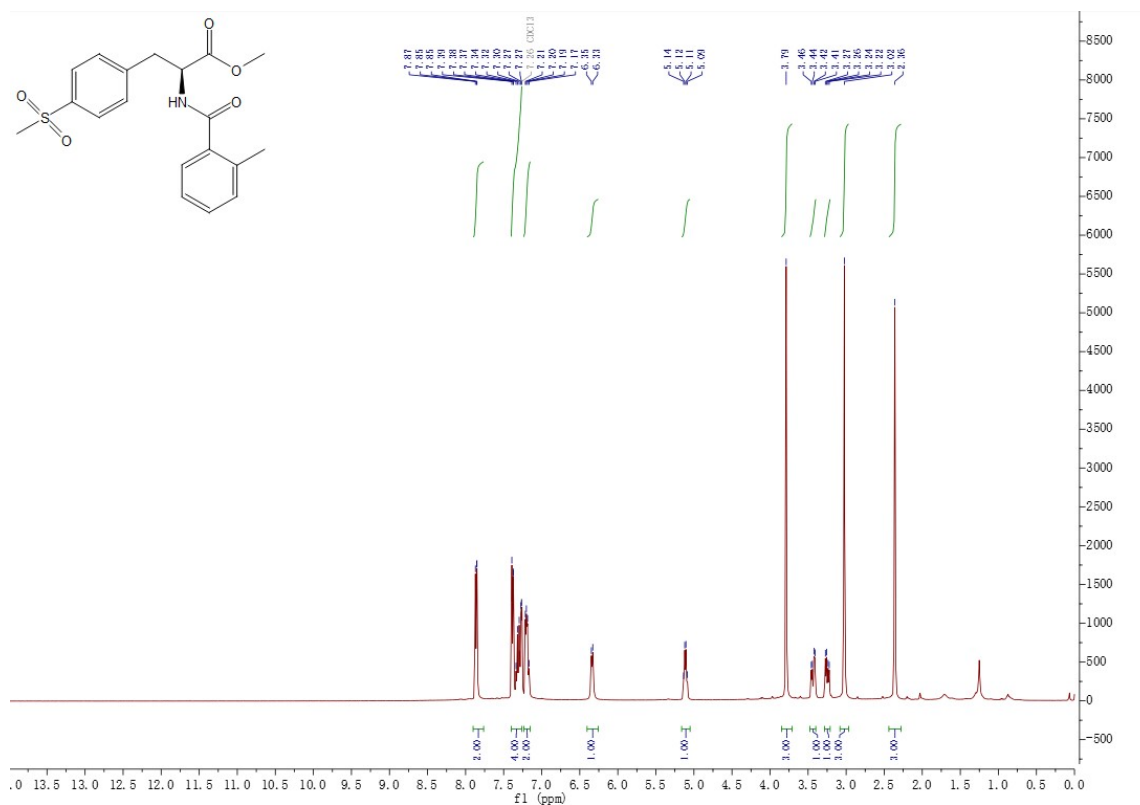

**2j <sup>13</sup>C NMR (101 MHz, CDCl<sub>3</sub>)**

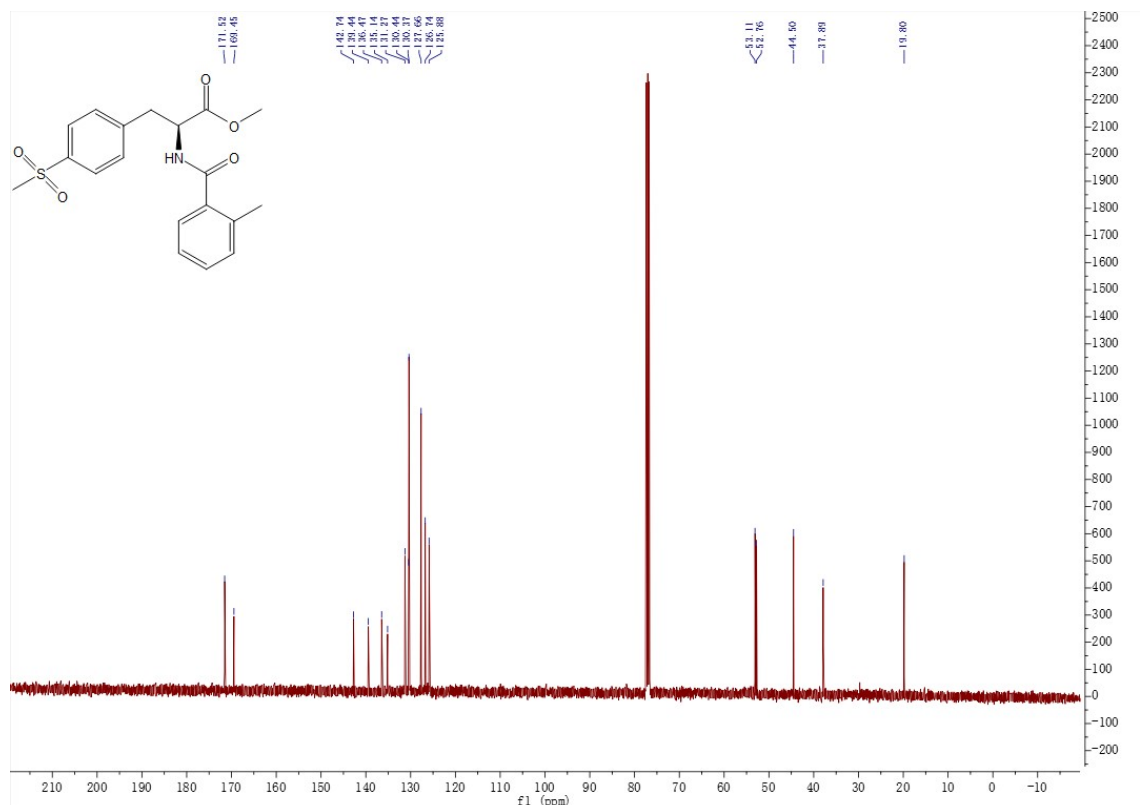

**2k <sup>1</sup>H NMR (400 MHz, CDCl<sub>3</sub>)**

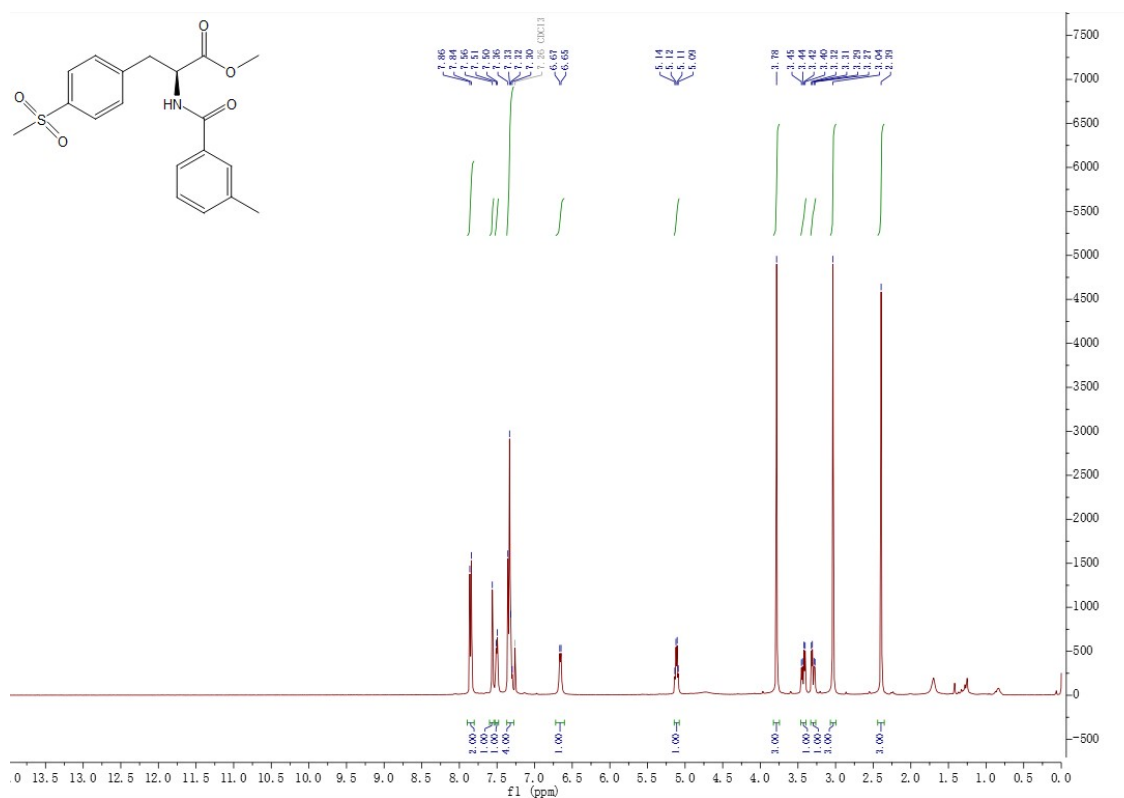

**2k <sup>13</sup>C NMR (101 MHz, CDCl<sub>3</sub>)**

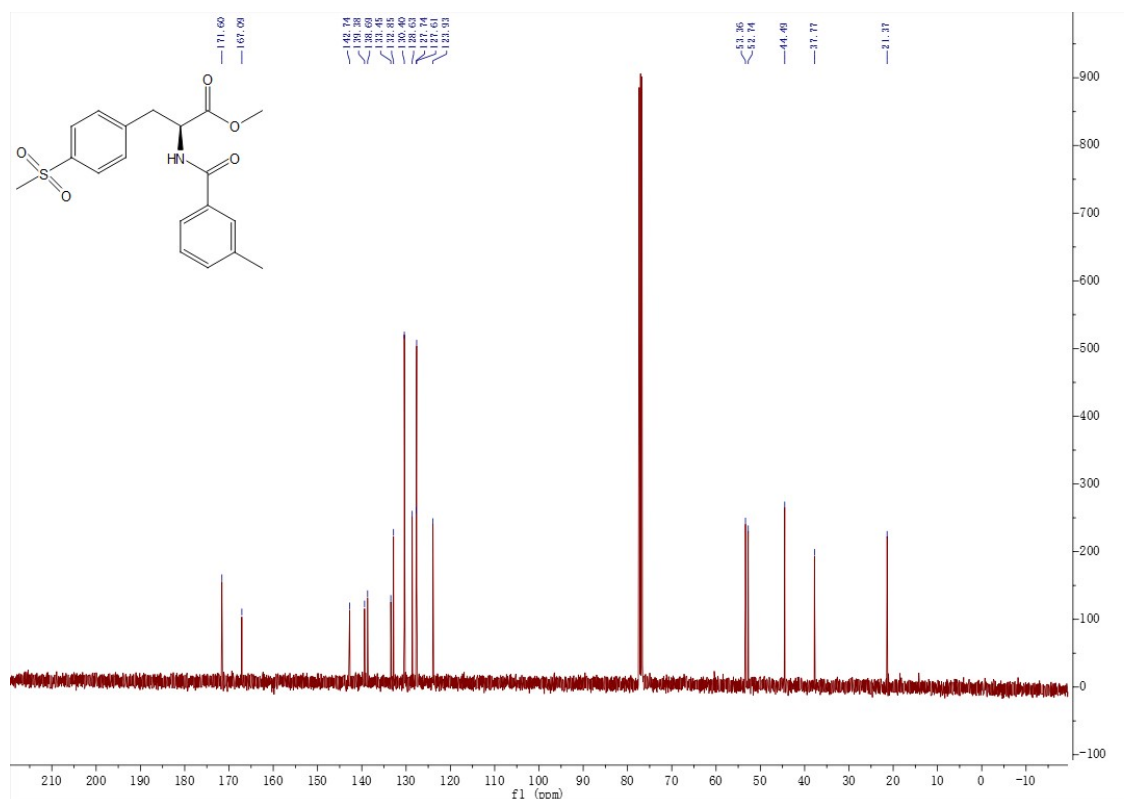

## 21 <sup>1</sup>H NMR (400 MHz, CDCl<sub>3</sub>)

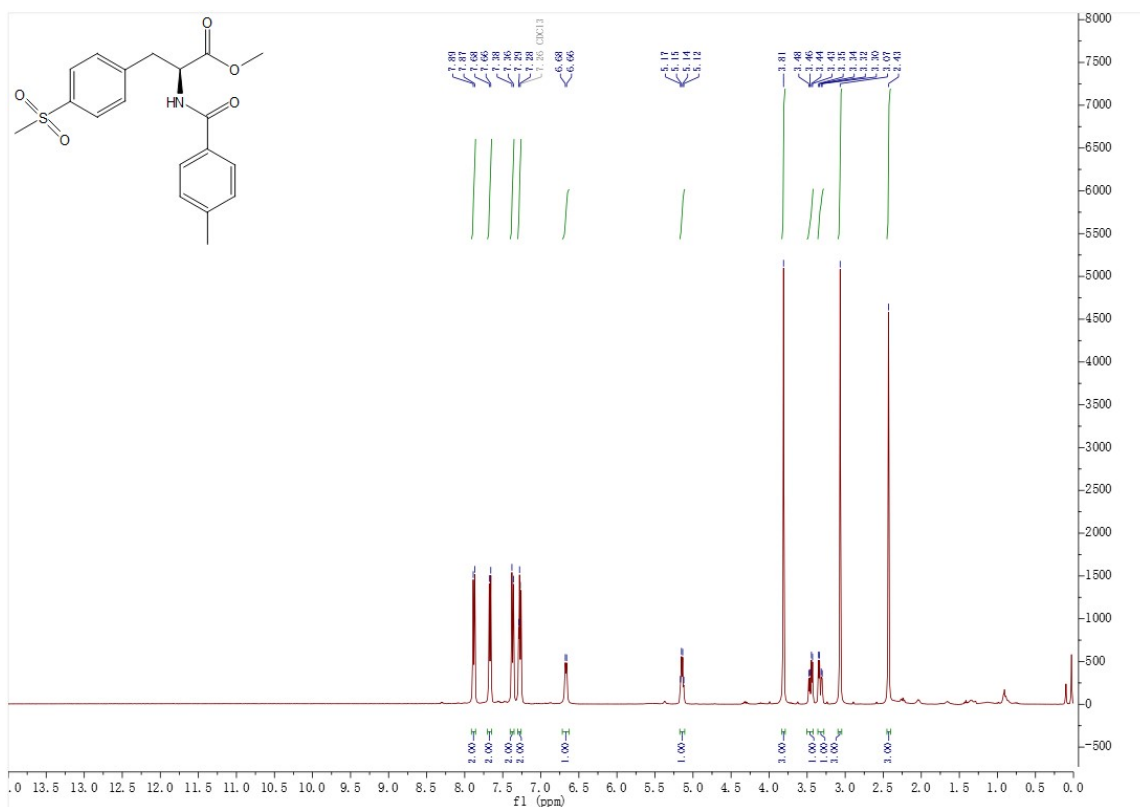

## 21 <sup>13</sup>C NMR (101 MHz, CDCl<sub>3</sub>)

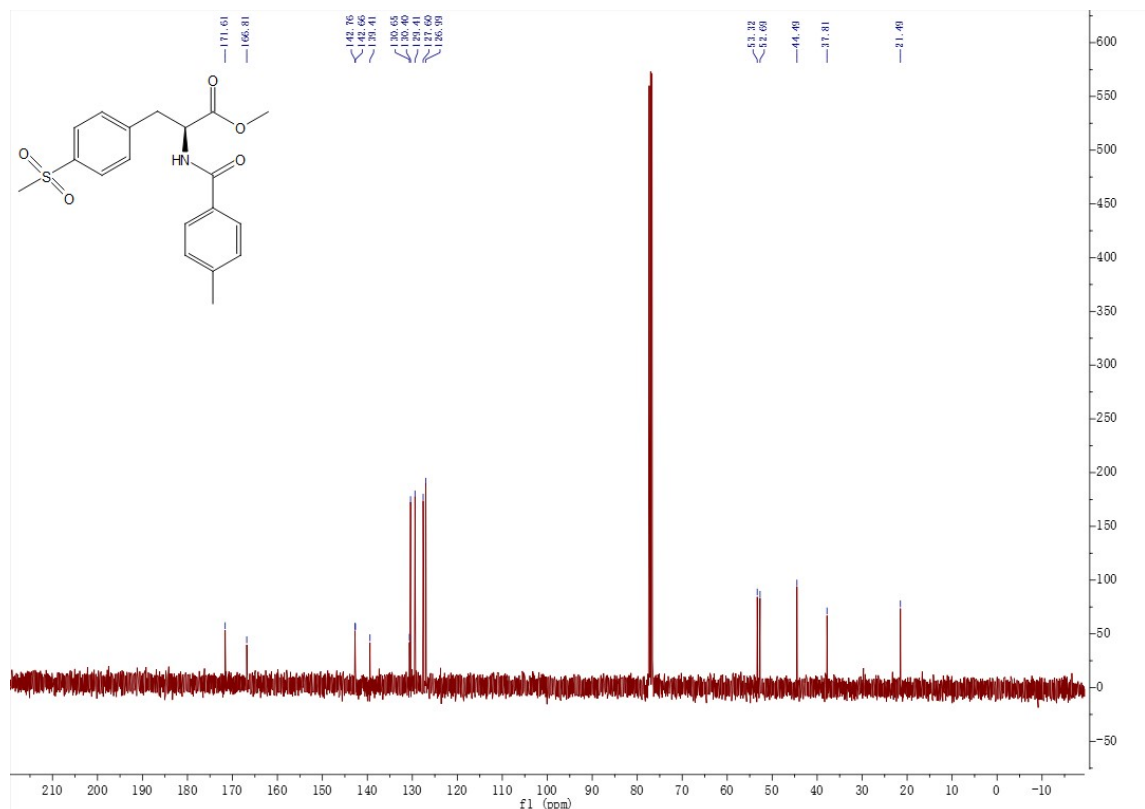

**2m  $^1\text{H}$  NMR (400 MHz,  $\text{CDCl}_3$ )**

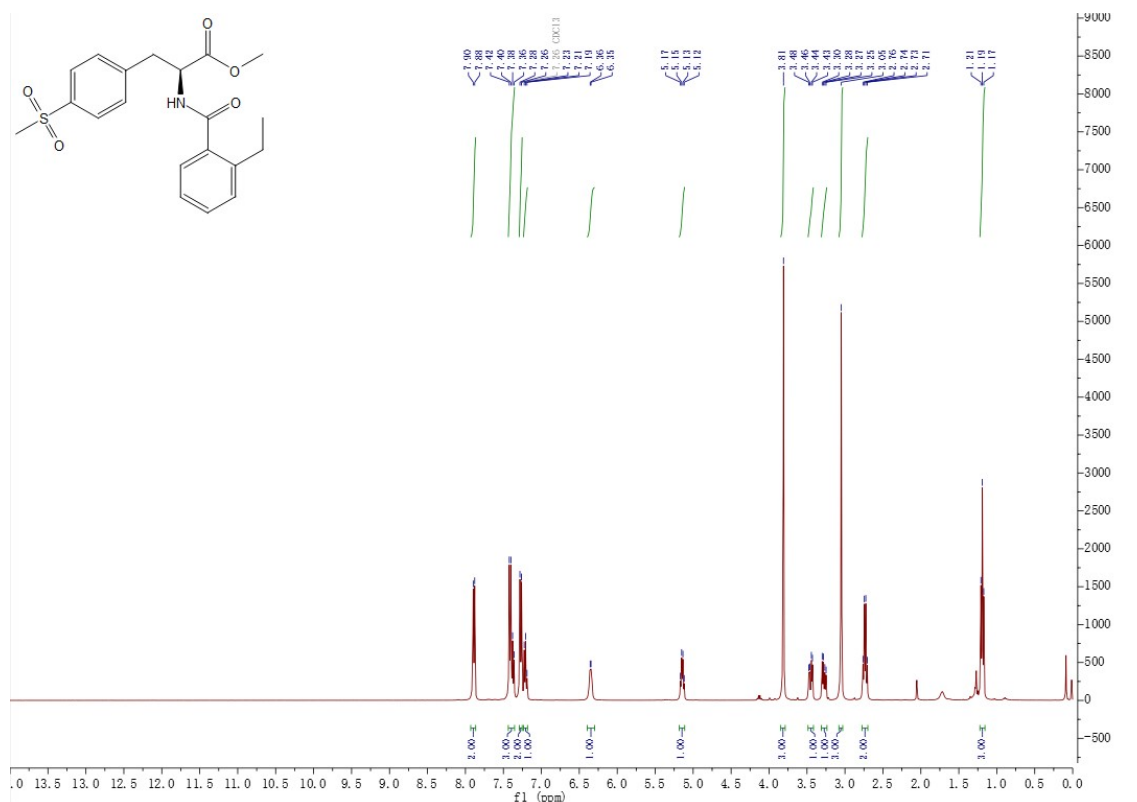

**2m  $^{13}\text{C}$  NMR (101 MHz,  $\text{CDCl}_3$ )**

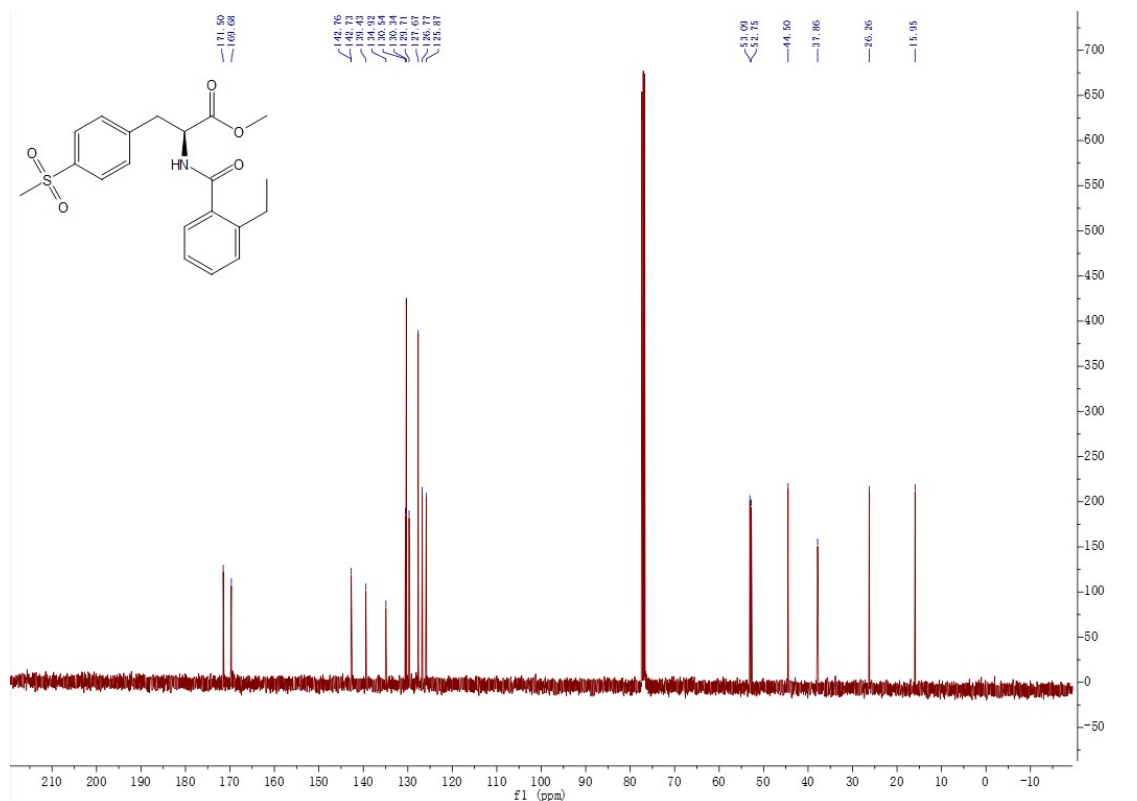

**2n <sup>1</sup>H NMR (400 MHz, CDCl<sub>3</sub>)**

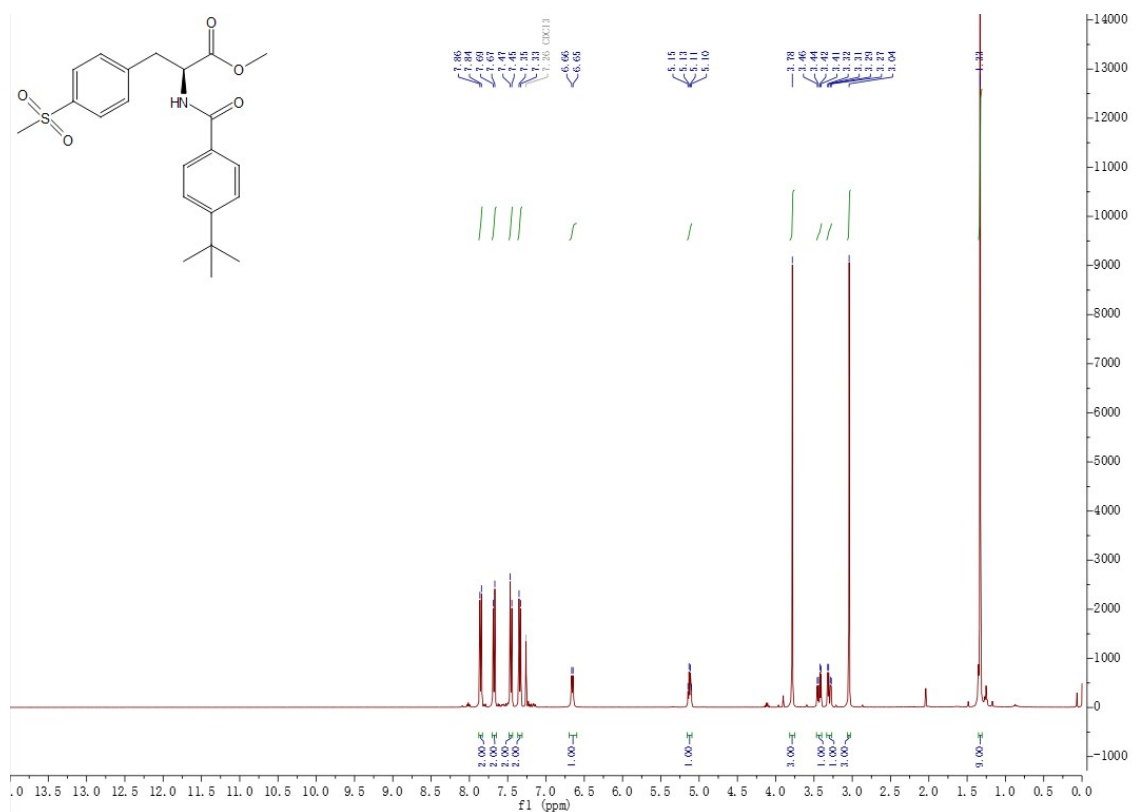

**2n <sup>13</sup>C NMR (101 MHz, CDCl<sub>3</sub>)**

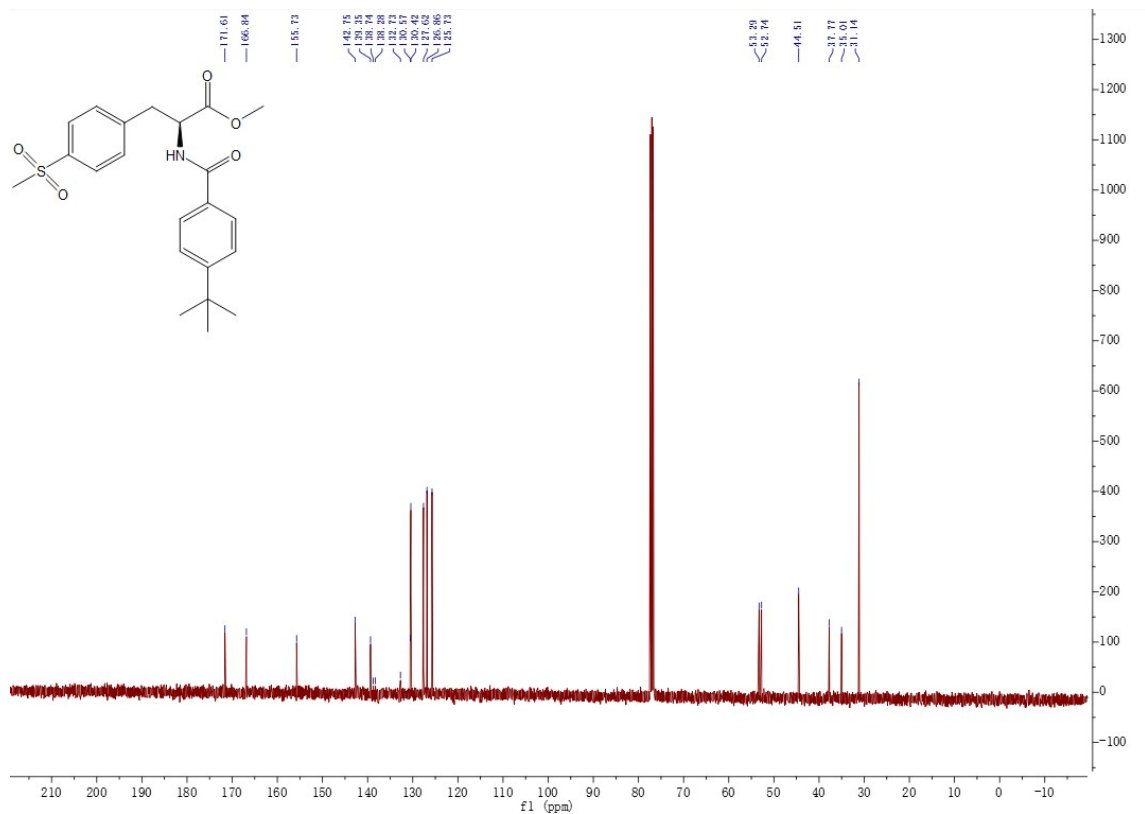

**2o <sup>1</sup>H NMR (400 MHz, CDCl<sub>3</sub>)**

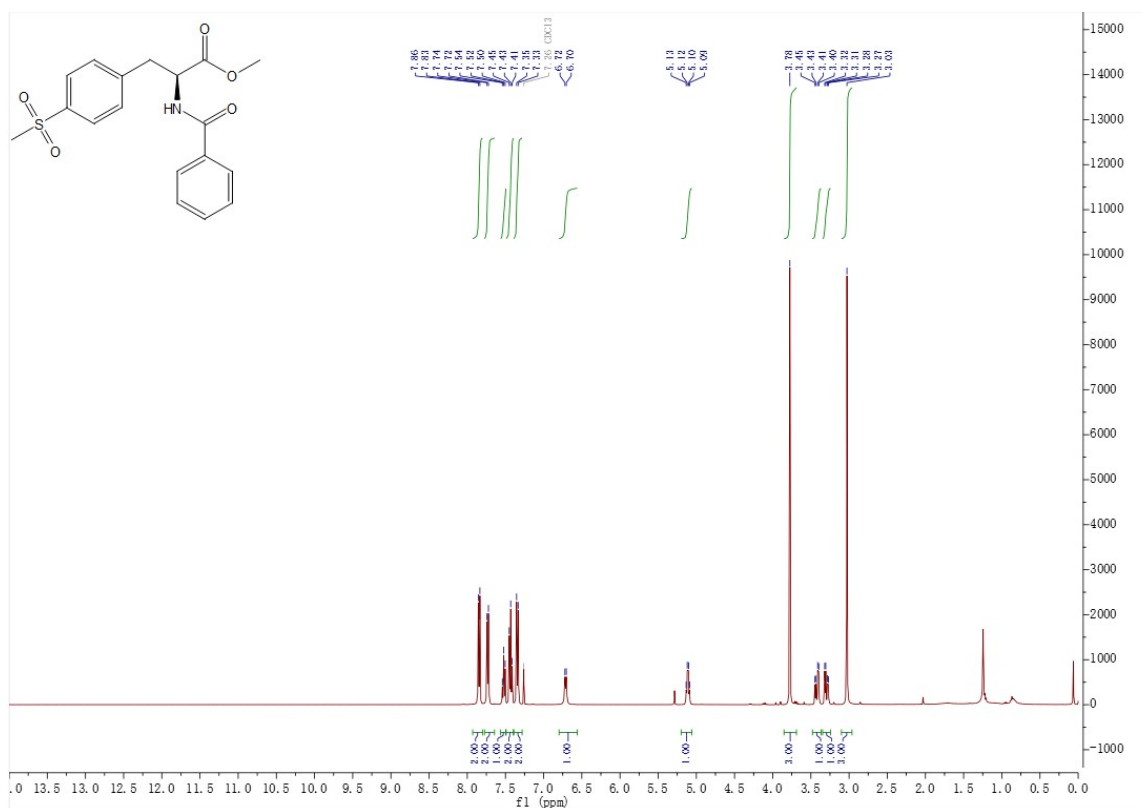

**2o <sup>13</sup>C NMR (101 MHz, CDCl<sub>3</sub>)**

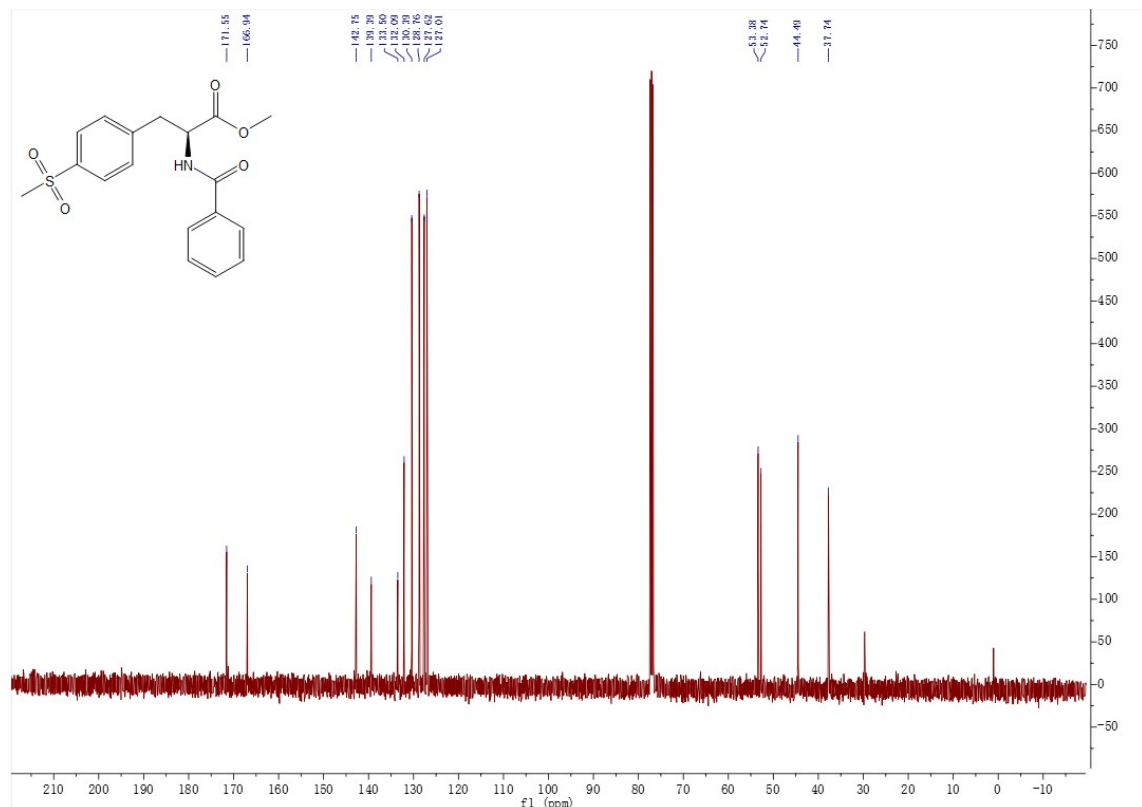

2p <sup>1</sup>H NMR (400 MHz, CDCl<sub>3</sub>)

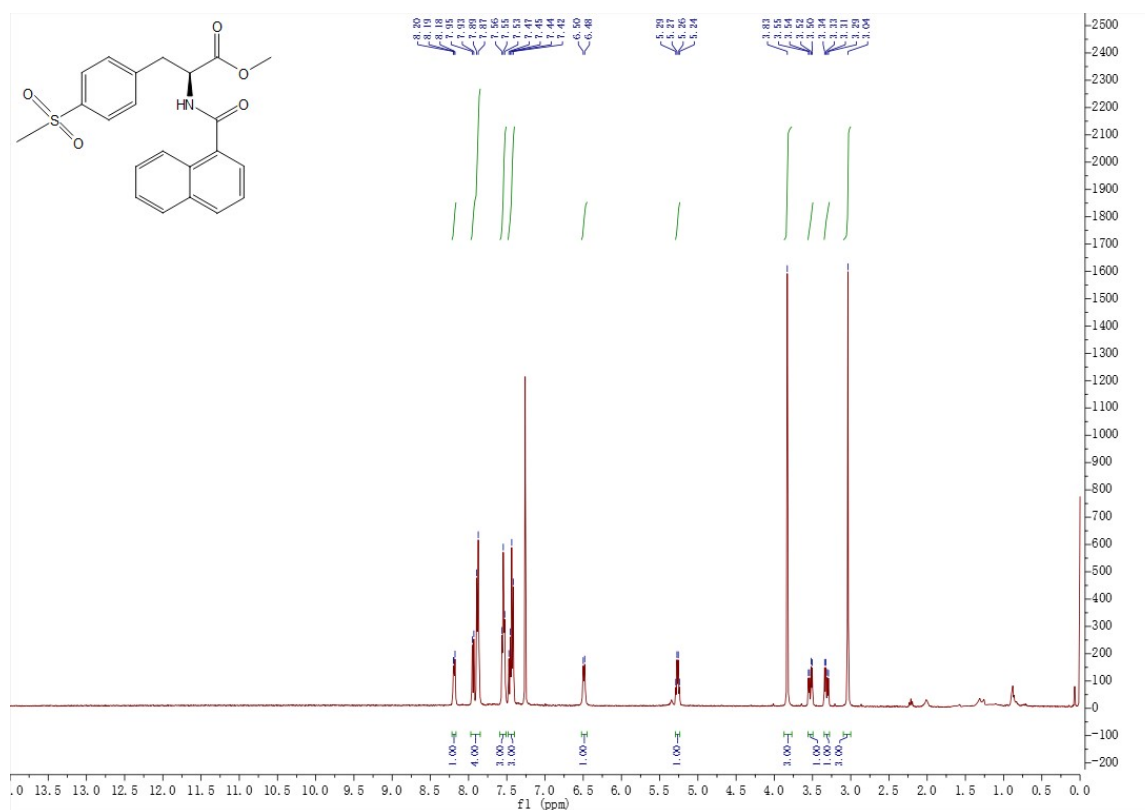

2p <sup>13</sup>C NMR (101 MHz, CDCl<sub>3</sub>)

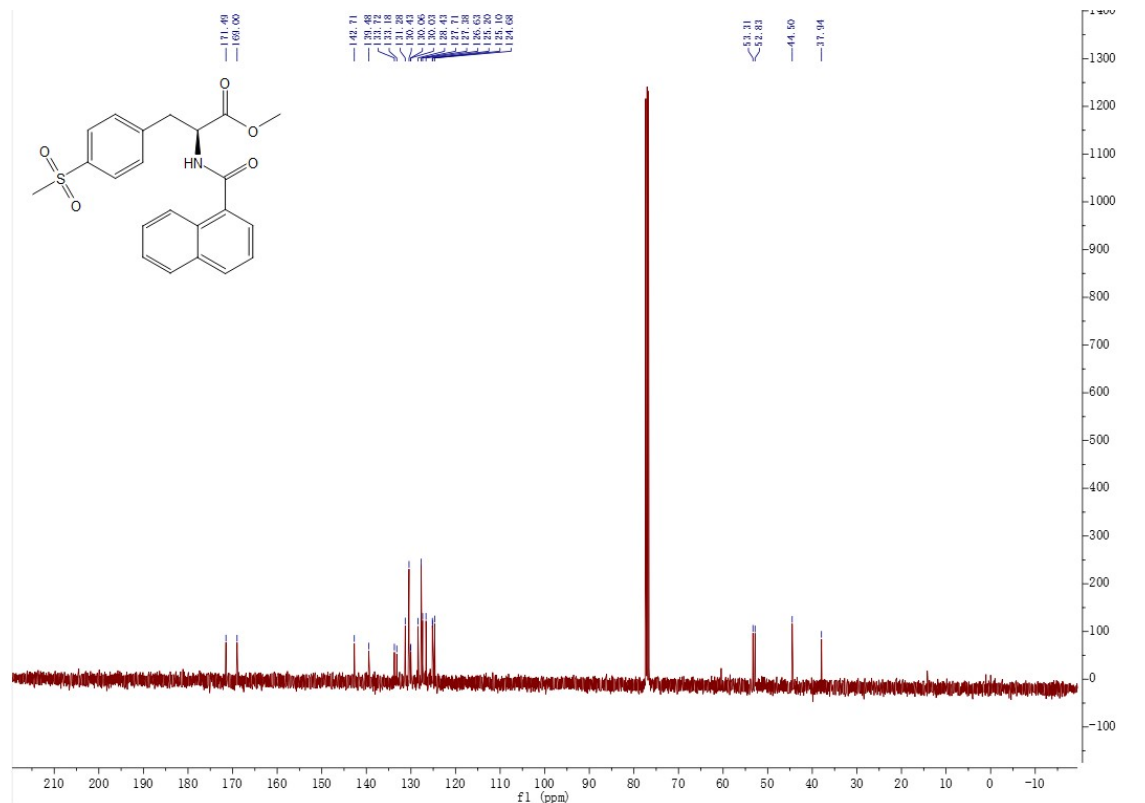

**2q <sup>1</sup>H NMR (400 MHz, CDCl<sub>3</sub>)**

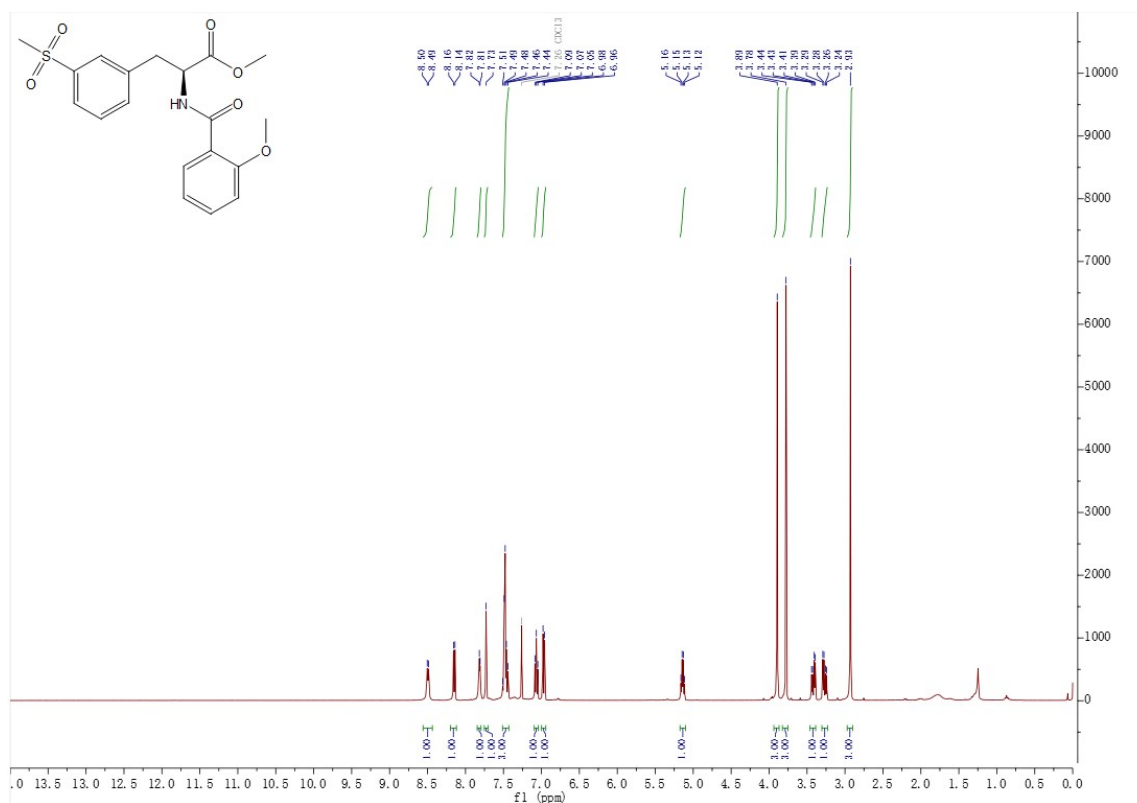

**2q <sup>13</sup>C NMR (101 MHz, CDCl<sub>3</sub>)**

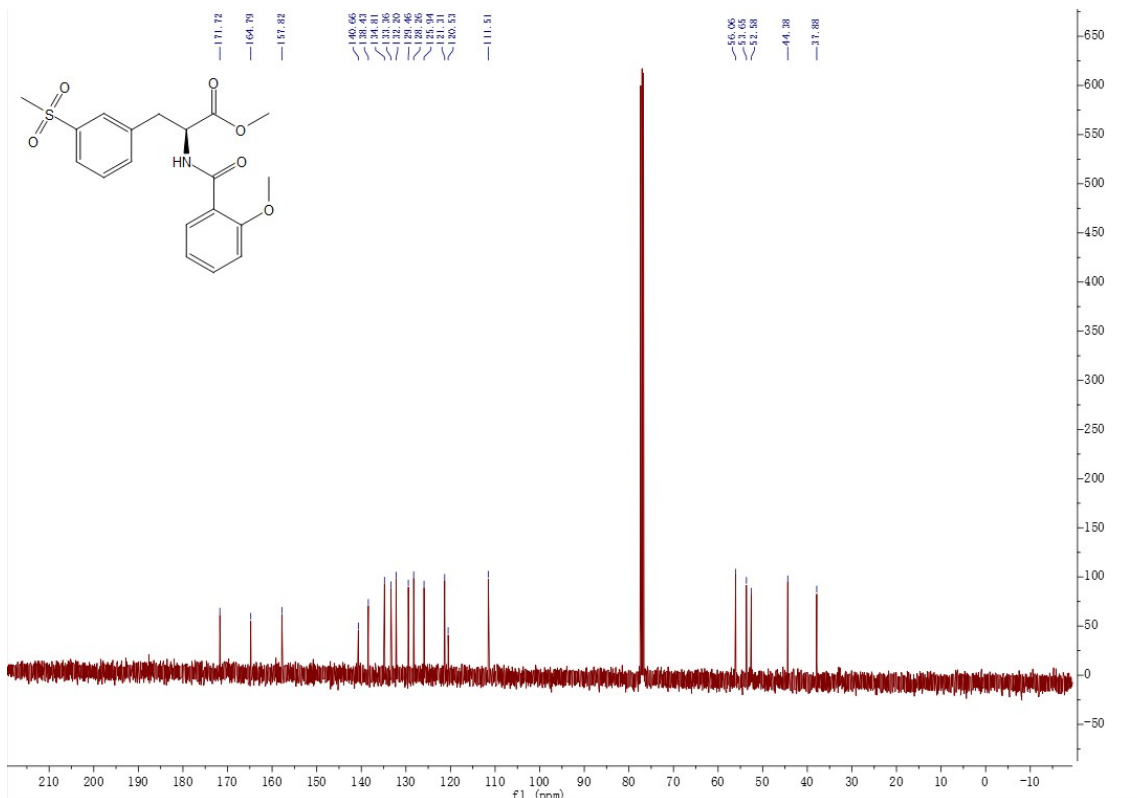



**2r**  $^1\text{H}$  NMR (400 MHz,  $\text{CDCl}_3$ )

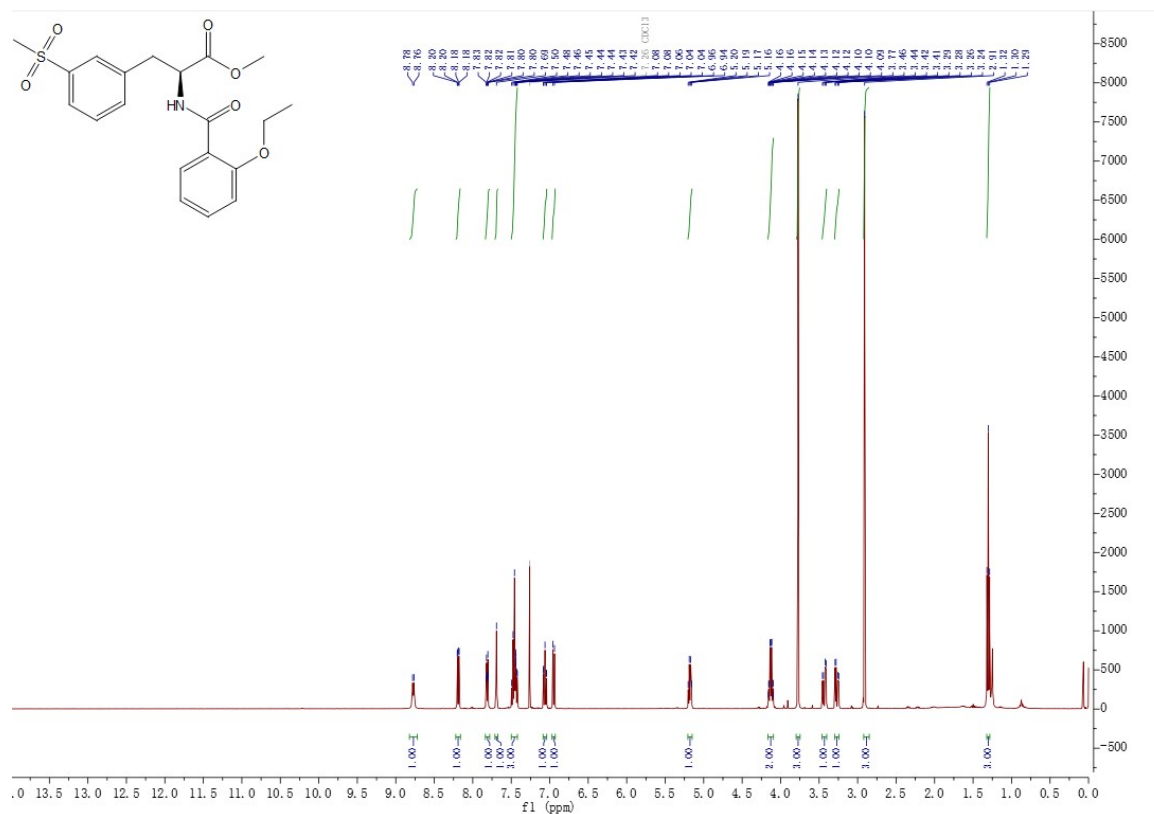

**2r**  $^{13}\text{C}$  NMR (101 MHz,  $\text{CDCl}_3$ )

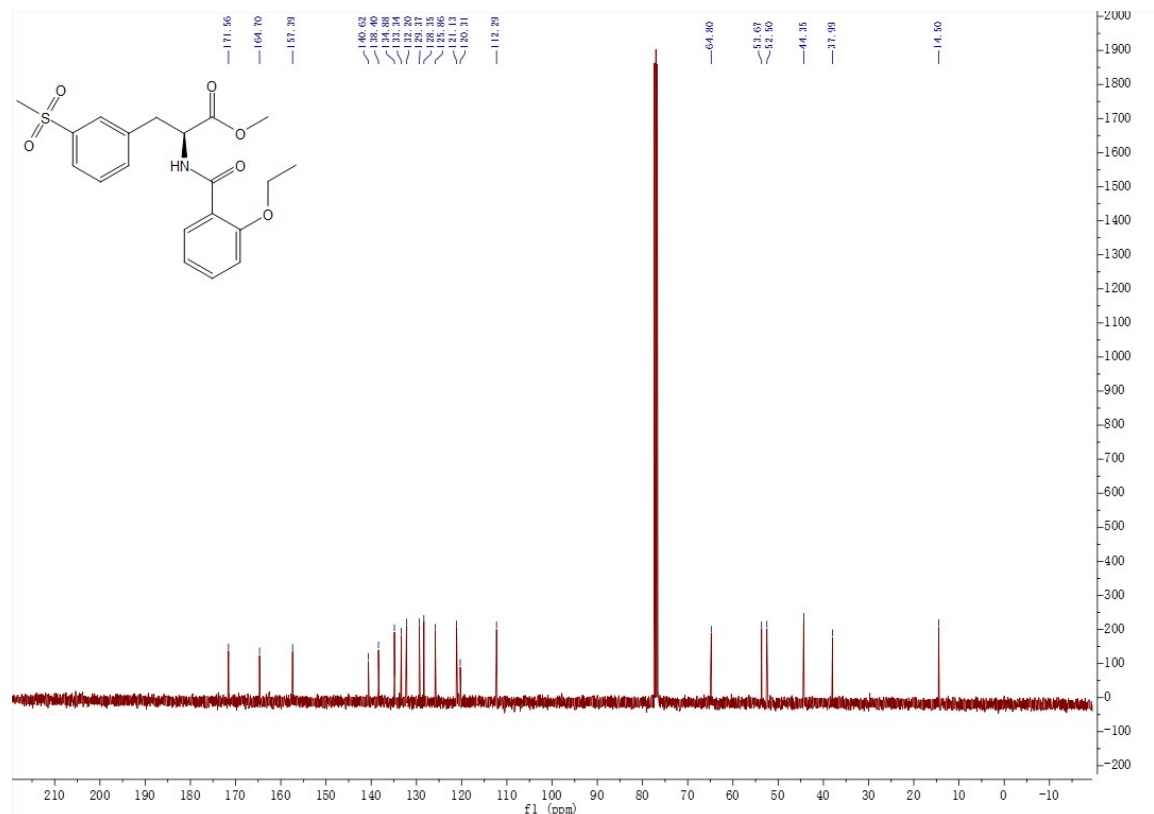

## 5. HPLC Data

### Racemic standard

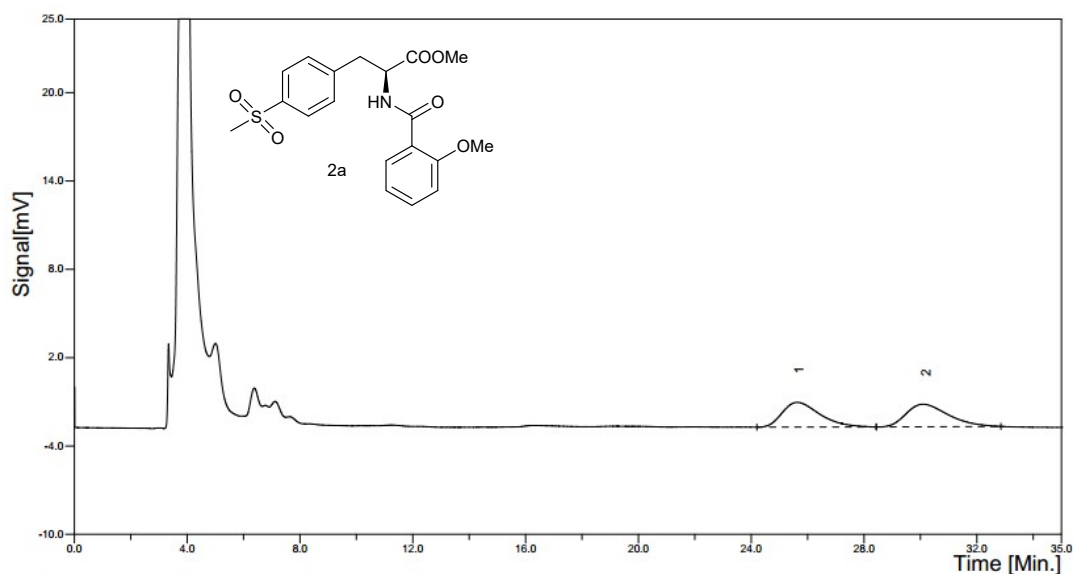

| Peak | RT (min) | Heigh (mv) | Area (mV*s) | Area (%) |
|------|----------|------------|-------------|----------|
| 1    | 25.62667 | 1.68       | 155.11      | 49.5730  |
| 2    | 30.12500 | 1.53       | 157.78      | 50.4270  |

### Enantio-enriched product

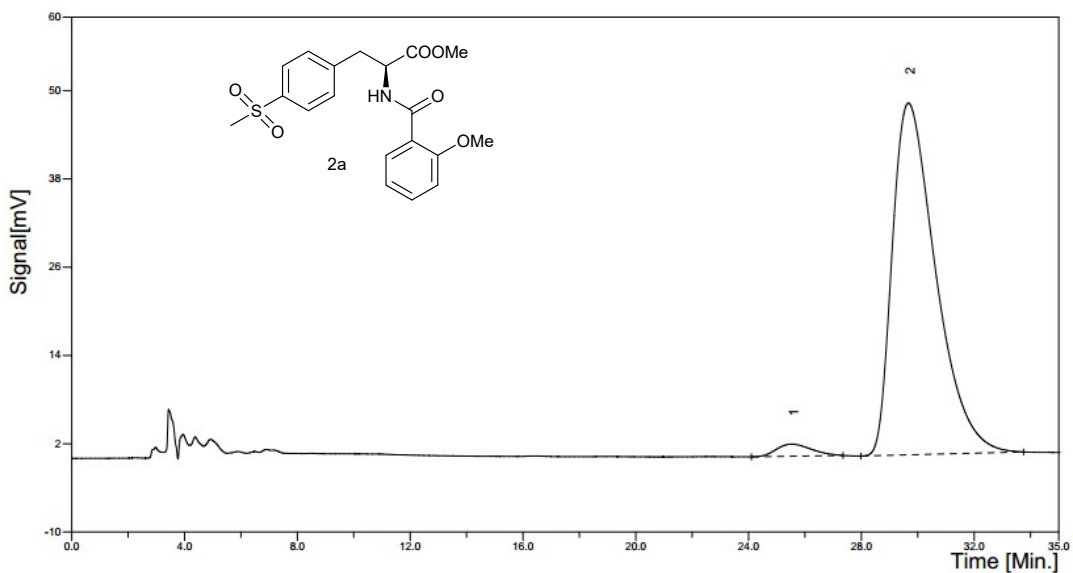

| Peak | RT (min) | Heigh (mv) | Area (mV*s) | Area (%) |
|------|----------|------------|-------------|----------|
| 1    | 25.53083 | 1.65       | 141.24      | 2.6940   |
| 2    | 29.66500 | 47.83      | 5101.32     | 97.3060  |

**HPLC Condition: Column:** DAICEL Chiralpak OJ-H column;

**Eluent:** *n*-hexane/ethanol = 60/40; **Flow rate:** 1.0 mL/min; **Detection:** UV 254 nm.

### Racemic standard

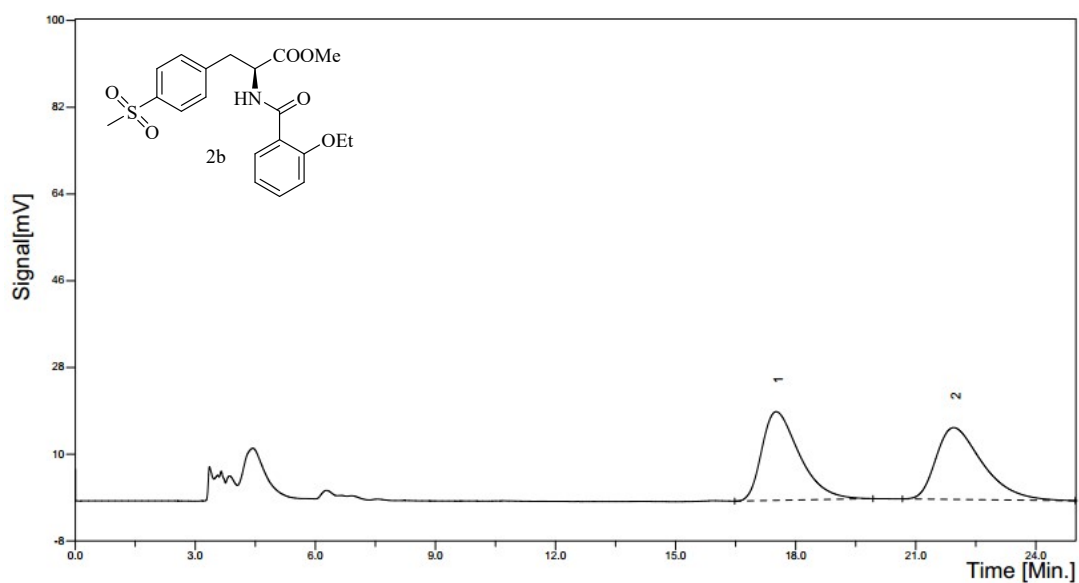

| Peak | RT (min) | Heigh (mv) | Area (mV*s) | Area (%) |
|------|----------|------------|-------------|----------|
| 1    | 17.51417 | 18.40      | 1201.45     | 50.0720  |
| 2    | 21.95000 | 14.90      | 1198.00     | 49.9280  |

### Enantio-enriched product

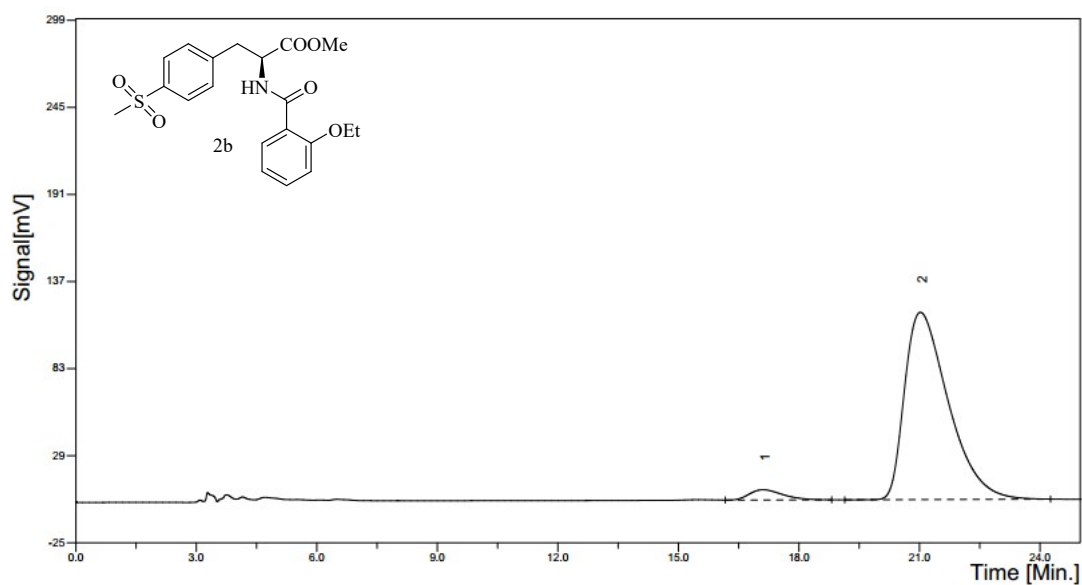

| Peak | RT (min) | Heigh (mv) | Area (mV*s) | Area (%) |
|------|----------|------------|-------------|----------|
| 1    | 17.11083 | 6.34       | 364.81      | 3.9910   |
| 2    | 21.02250 | 116.12     | 8776.04     | 96.0090  |

**HPLC Condition:** Column: DAICEL Chiralpak OJ-H column;

**Eluent:** *n*-hexane/ethanol = 60/40; **Flow rate:** 1.0 mL/min; **Detection:** UV 254 nm.

### Racemic standard

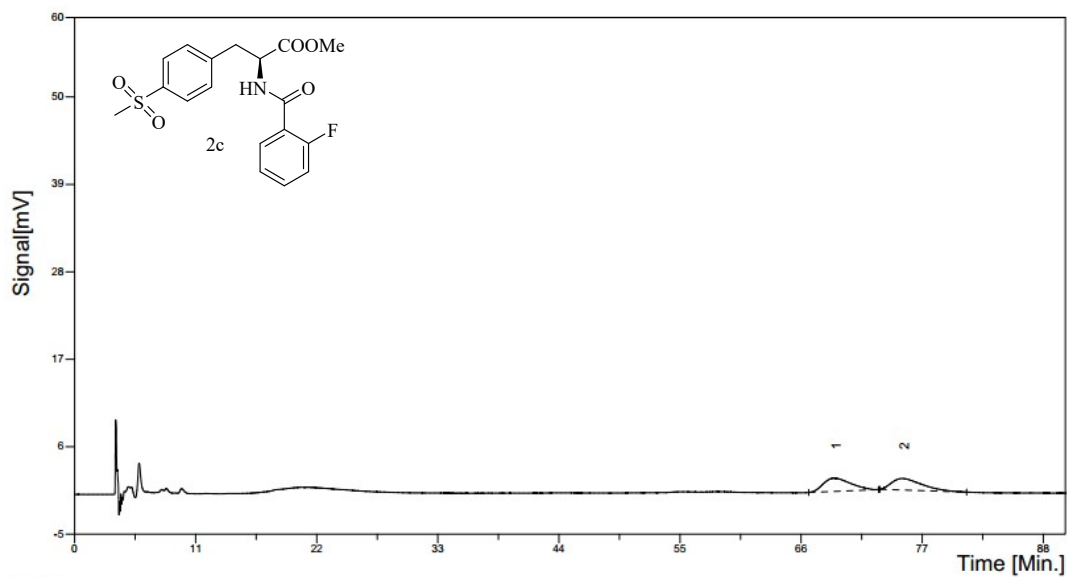

| Peak | RT (min) | Heigh (mv) | Area (mV*s) | Area (%) |
|------|----------|------------|-------------|----------|
| 1    | 69.00583 | 1.67       | 285.66      | 50.5213  |
| 2    | 75.20833 | 1.45       | 279.76      | 49.4787  |

### Enantio-enriched product

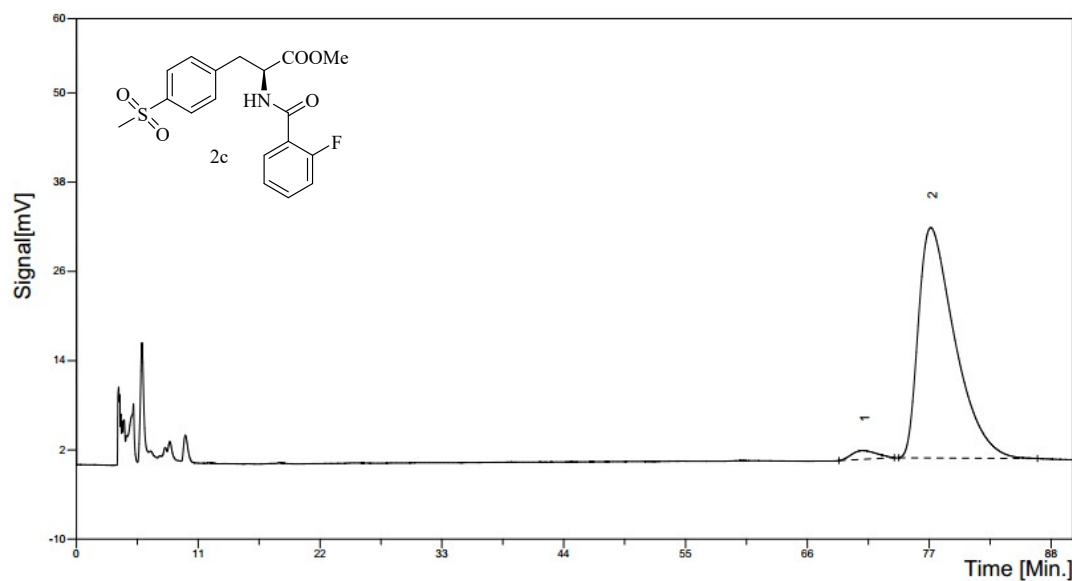

| Peak | RT (min) | Heigh (mv) | Area (mV*s) | Area (%) |
|------|----------|------------|-------------|----------|
| 1    | 71.01167 | 1.17       | 184.15      | 2.5342   |
| 2    | 77.12917 | 30.98      | 7082.50     | 97.4658  |

**HPLC Condition: Column:** DAICEL Chiralpak OJ-H column;

**Eluent:** *n*-hexane/ethanol = 80/20; **Flow rate:** 1.0 mL/min; **Detection:** UV 254 nm.

### Racemic standard

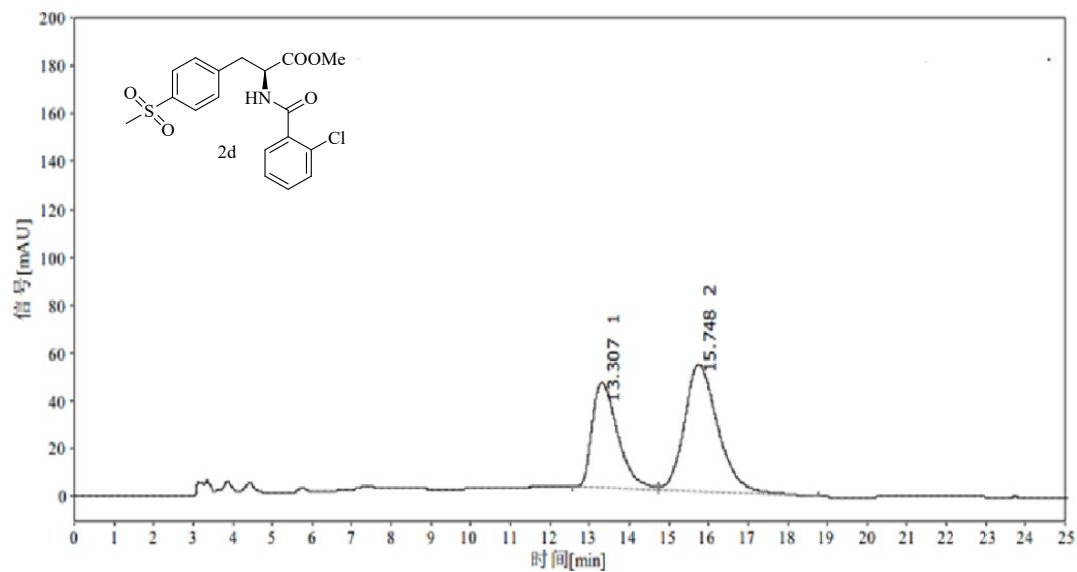

| Peak | RT (min) | Height (mv) | Area (mV*s) | Area (%) |
|------|----------|-------------|-------------|----------|
| 1    | 13.307   | 44.049      | 1995.129    | 38.6     |
| 2    | 15.748   | 53.189      | 3172.245    | 61.4     |

### Enantio-enriched product

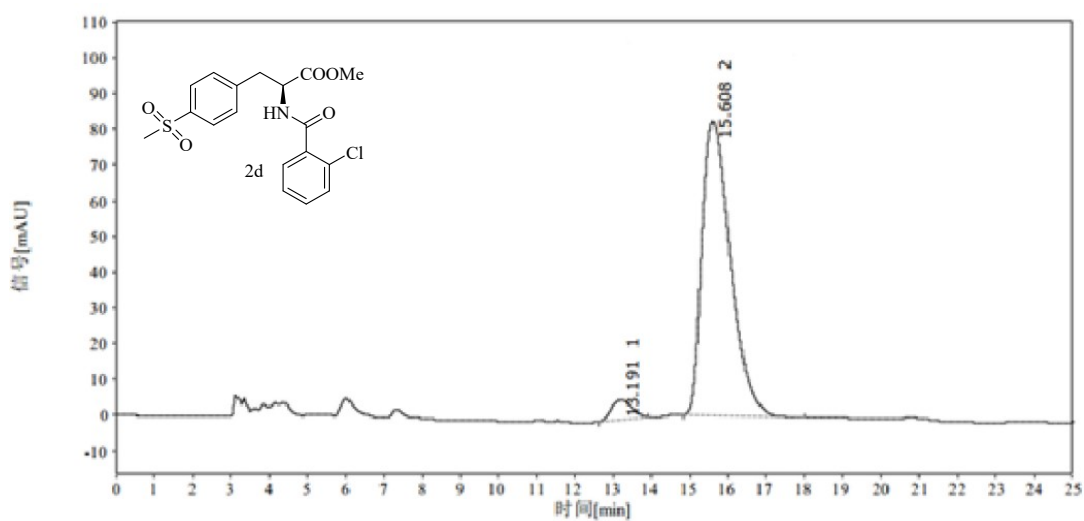

| Peak | RT (min) | Height (mv) | Area (mV*s) | Area (%) |
|------|----------|-------------|-------------|----------|
| 1    | 13.191   | 5.607       | 207.176     | 4.7      |
| 2    | 15.608   | 82.156      | 4236.124    | 95.3     |

**HPLC Condition: Column:** DAICEL Chiralpak OJ-H column;

**Eluent:** *n*-hexane/ethanol = 60/40; **Flow rate:** 1.0 mL/min; **Detection:** UV 254 nm.

### Racemic standard

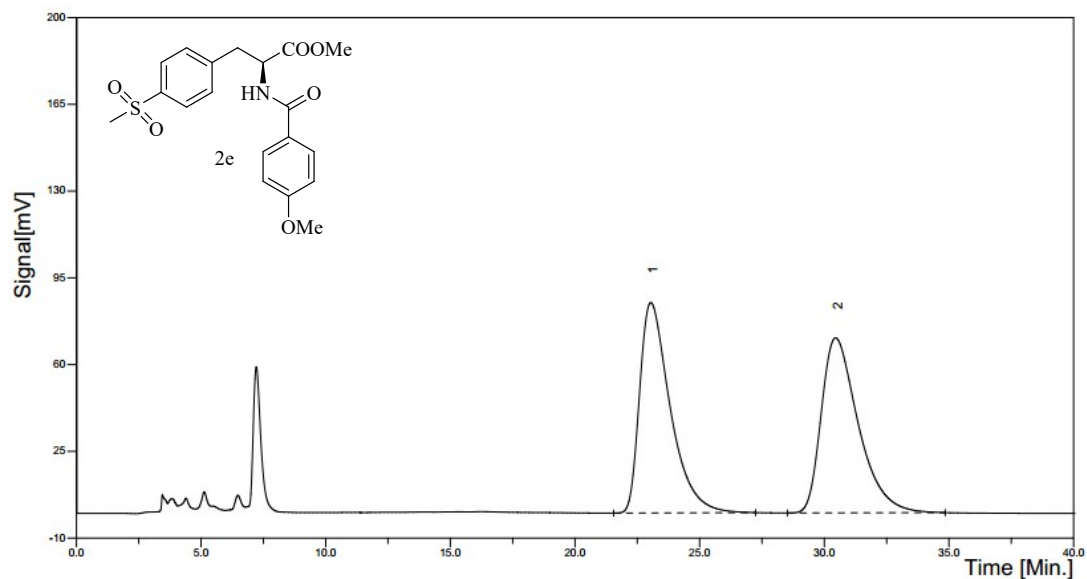

| Peak | RT (min) | Heigh (mv) | Area (mV*s) | Area (%) |
|------|----------|------------|-------------|----------|
| 1    | 23.04250 | 84.92      | 7236.70     | 49.8603  |
| 2    | 30.45417 | 70.61      | 7277.25     | 50.1397  |

### Enantio-enriched product

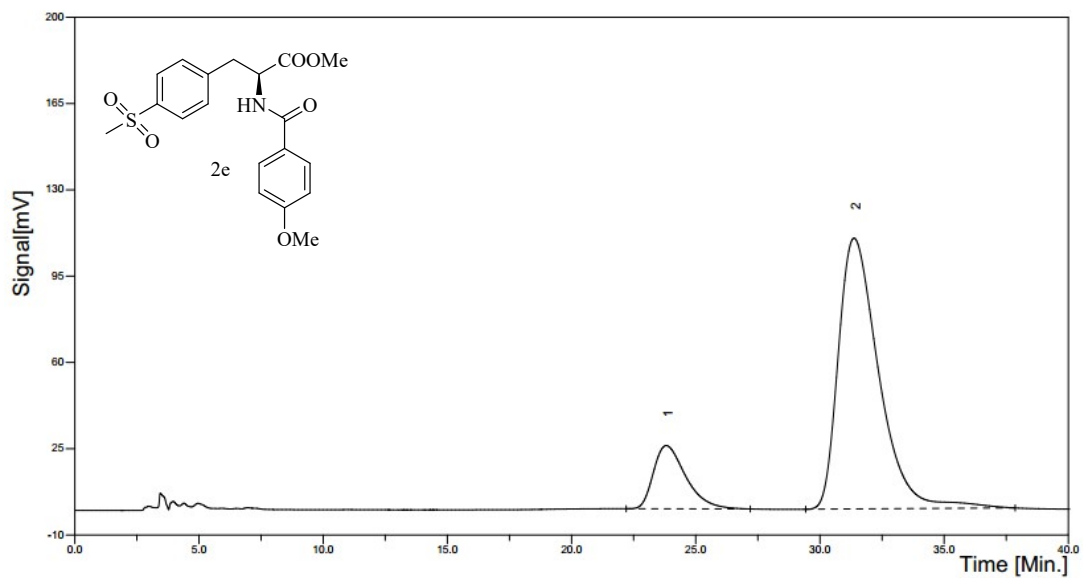

| Peak | RT (min) | Heigh (mv) | Area (mV*s) | Area (%) |
|------|----------|------------|-------------|----------|
| 1    | 23.81083 | 25.66      | 2324.18     | 15.7361  |
| 2    | 31.37333 | 109.84     | 12445.54    | 84.2639  |

**HPLC Condition: Column:** DAICEL Chiralpak OJ-H column;

**Eluent:** *n*-hexane/ethanol = 60/40; **Flow rate:** 1.0 mL/min; **Detection:** UV 254 nm.

### Racemic standard

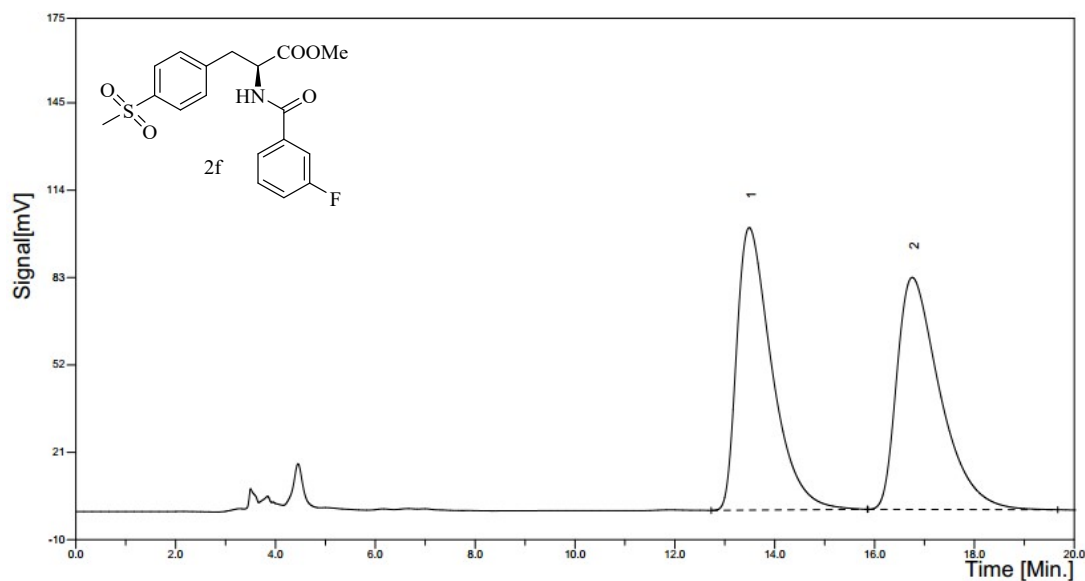

| Peak | RT (min) | Heigh (mv) | Area (mV*s) | Area (%) |
|------|----------|------------|-------------|----------|
| 1    | 13.49000 | 100.24     | 4890.17     | 49.8711  |
| 2    | 16.75583 | 82.31      | 4915.45     | 50.1289  |

### Enantio-enriched product

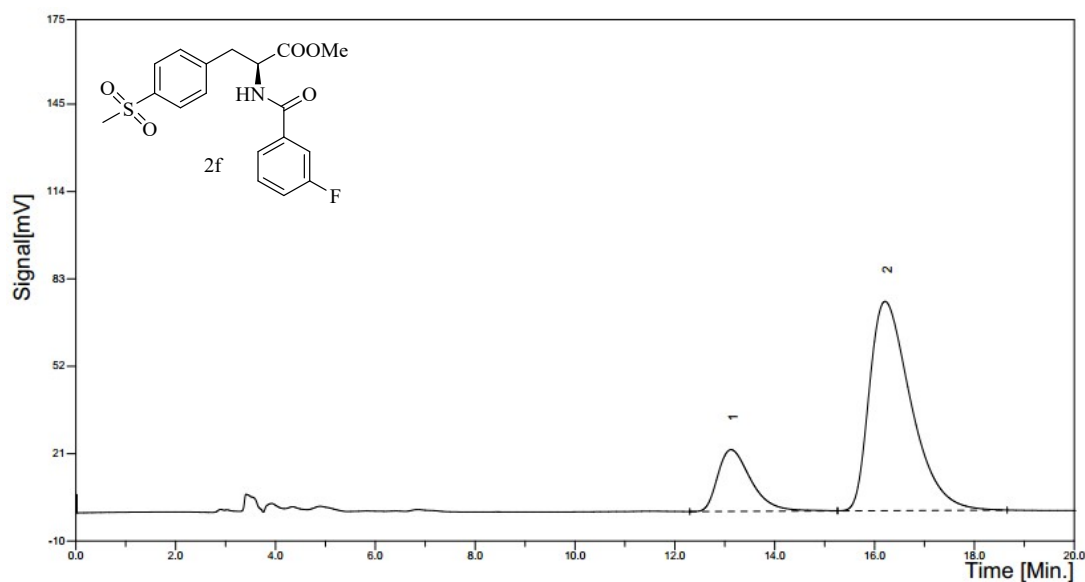

| Peak | RT (min) | Heigh (mv) | Area (mV*s) | Area (%) |
|------|----------|------------|-------------|----------|
| 1    | 13.12583 | 21.90      | 1011.64     | 19.1167  |
| 2    | 16.21167 | 74.24      | 4280.27     | 80.8833  |

**HPLC Condition:** Column: DAICEL Chiralpak OJ-H column;

**Eluent:** *n*-hexane/ethanol = 60/40; **Flow rate:** 1.0 mL/min; **Detection:** UV 254 nm.

### Racemic standard

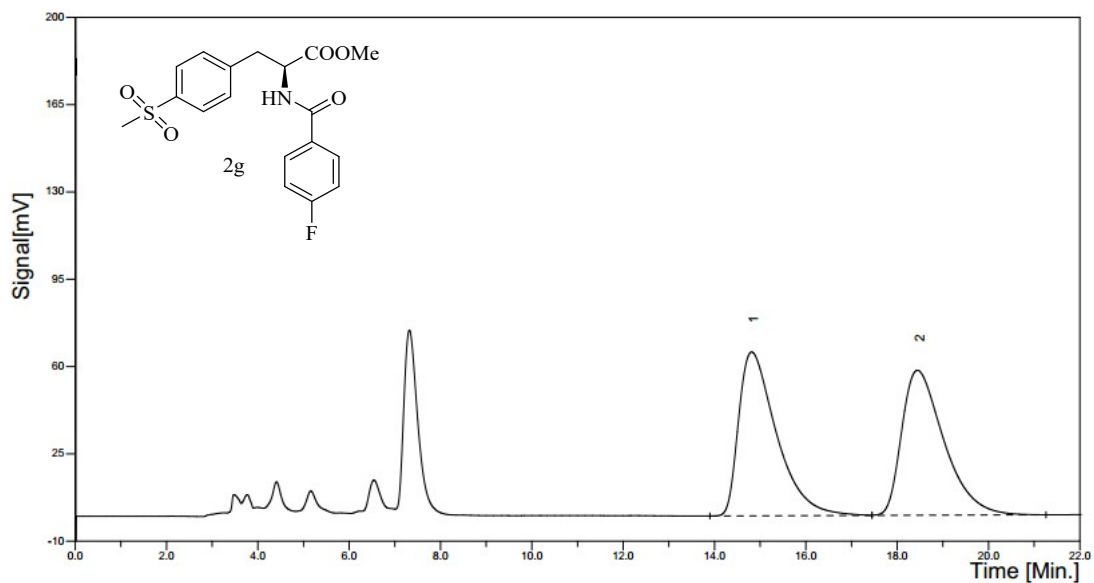

| Peak | RT (min) | Heigh (mv) | Area (mV*s) | Area (%) |
|------|----------|------------|-------------|----------|
| 1    | 14.81333 | 65.67      | 3780.12     | 50.3373  |
| 2    | 18.44500 | 58.11      | 3729.46     | 49.6627  |

### Enantio-enriched product

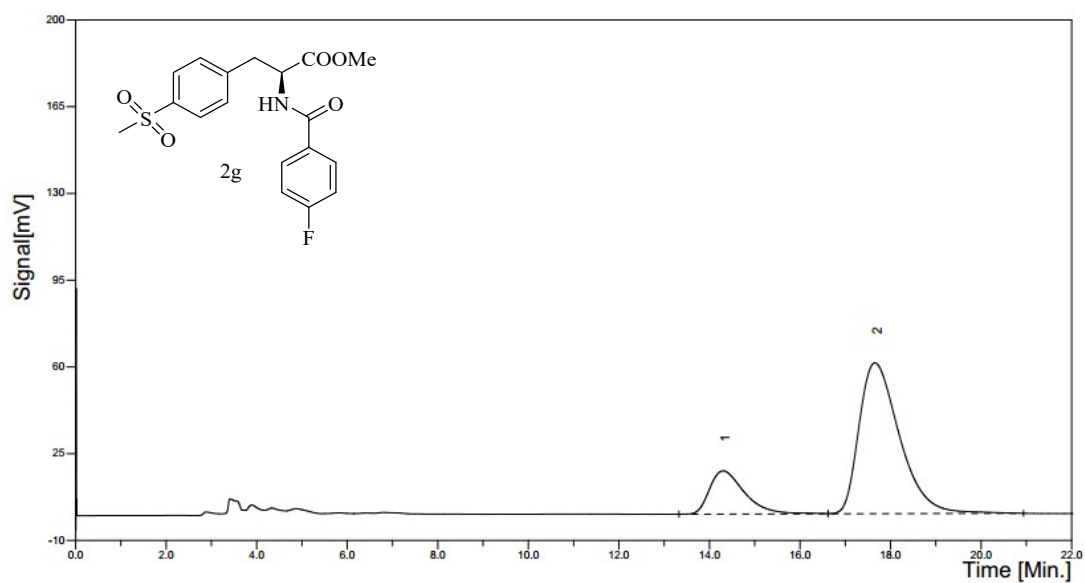

| Peak | RT (min) | Heigh (mv) | Area (mV*s) | Area (%) |
|------|----------|------------|-------------|----------|
| 1    | 14.30250 | 17.44      | 935.04      | 19.8391  |
| 2    | 17.65750 | 60.86      | 3778.07     | 80.1609  |

**HPLC Condition: Column:** DAICEL Chiralpak OJ-H column;

**Eluent:** *n*-hexane/ethanol = 60/40; **Flow rate:** 1.0 mL/min; **Detection:** UV 254 nm.



### Racemic standard

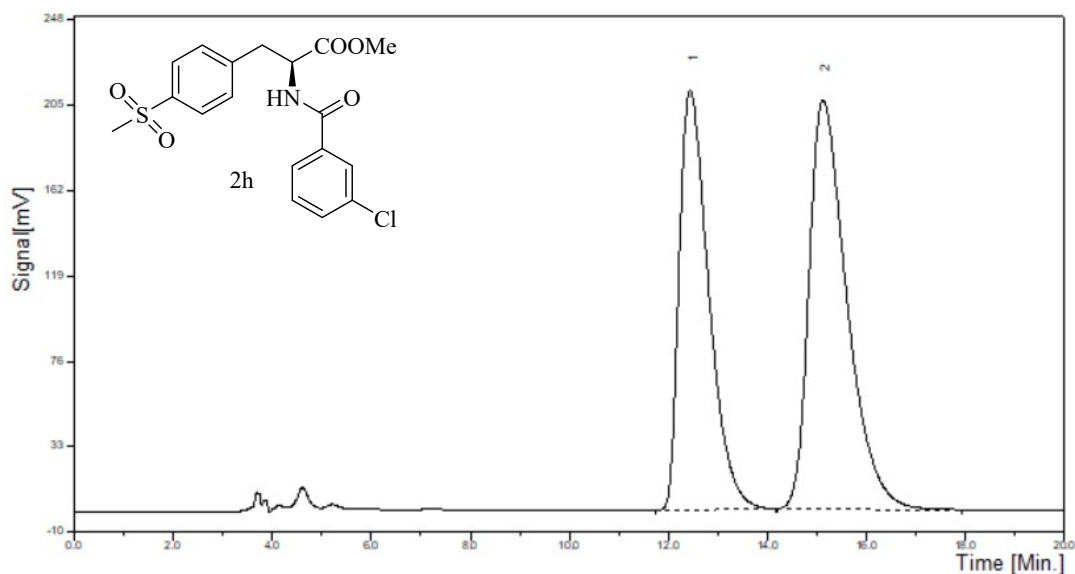

| Peak | RT (min) | Heigh (mv) | Area (mV*s) | Area (%) |
|------|----------|------------|-------------|----------|
| 1    | 12.43750 | 211.07     | 8779.06     | 44.5050  |
| 2    | 15.12083 | 205.97     | 10946.95    | 55.4950  |

### Enantio-enriched product

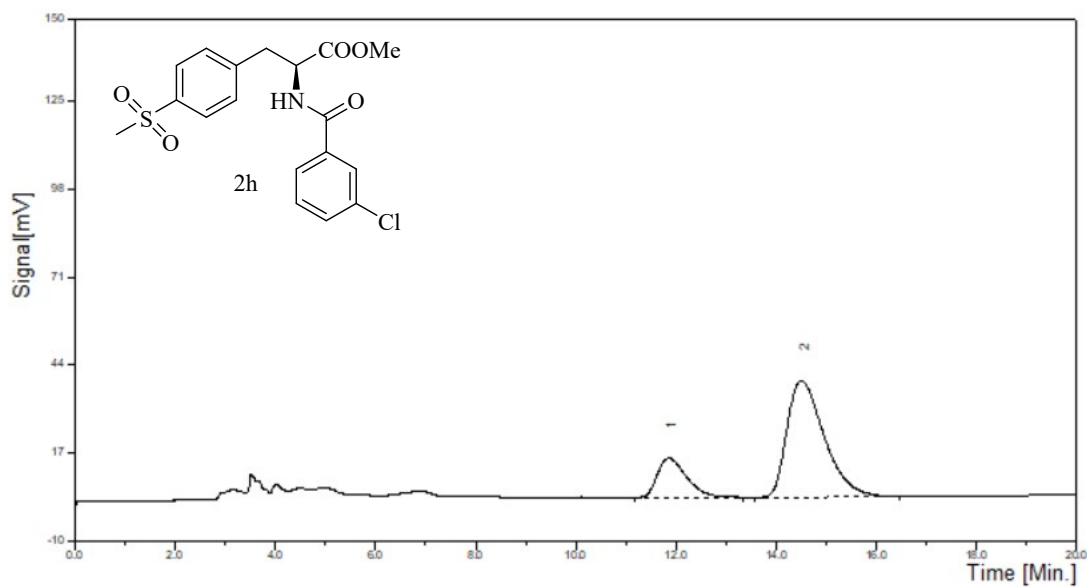

| Peak | RT (min) | Heigh (mv) | Area (mV*s) | Area (%) |
|------|----------|------------|-------------|----------|
| 1    | 11.85750 | 11.98      | 482.32      | 20.7629  |
| 2    | 14.50083 | 35.72      | 1840.69     | 79.2371  |

**HPLC Condition: Column:** DAICEL Chiralpak OJ-H column;

**Eluent:** *n*-hexane/ethanol = 60/40; **Flow rate:** 1.0 mL/min; **Detection:** UV 254 nm.

### Racemic standard

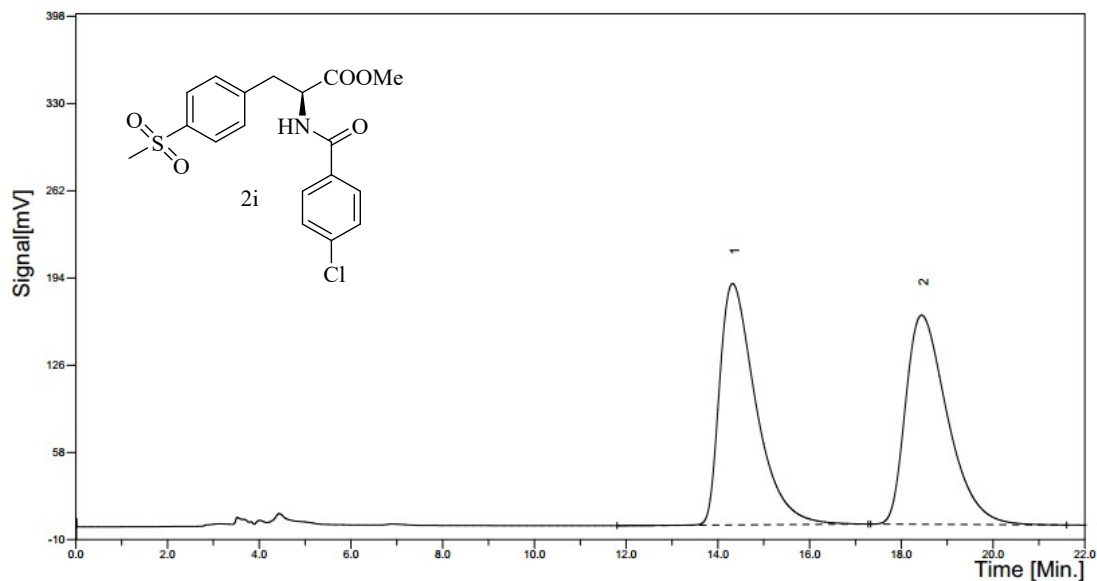

| Peak | RT (min) | Heigh (mv) | Area (mV*s) | Area (%) |
|------|----------|------------|-------------|----------|
| 1    | 14.32250 | 188.12     | 10324.08    | 50.0605  |
| 2    | 18.44417 | 163.07     | 10299.13    | 49.9395  |

### Enantio-enriched product

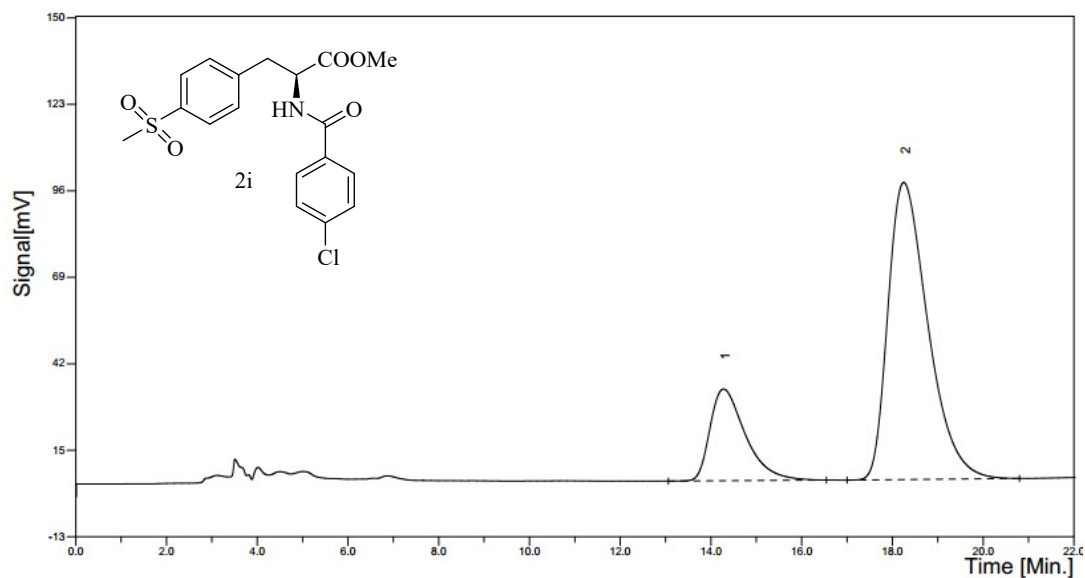

| Peak | RT (min) | Heigh (mv) | Area (mV*s) | Area (%) |
|------|----------|------------|-------------|----------|
| 1    | 14.27750 | 28.65      | 1546.37     | 21.4577  |
| 2    | 18.25083 | 92.77      | 5660.25     | 78.5423  |

**HPLC Condition: Column:** DAICEL Chiralpak OJ-H column;

**Eluent:** *n*-hexane/ethanol = 60/40; **Flow rate:** 1.0 mL/min; **Detection:** UV 254 nm.

### Racemic standard

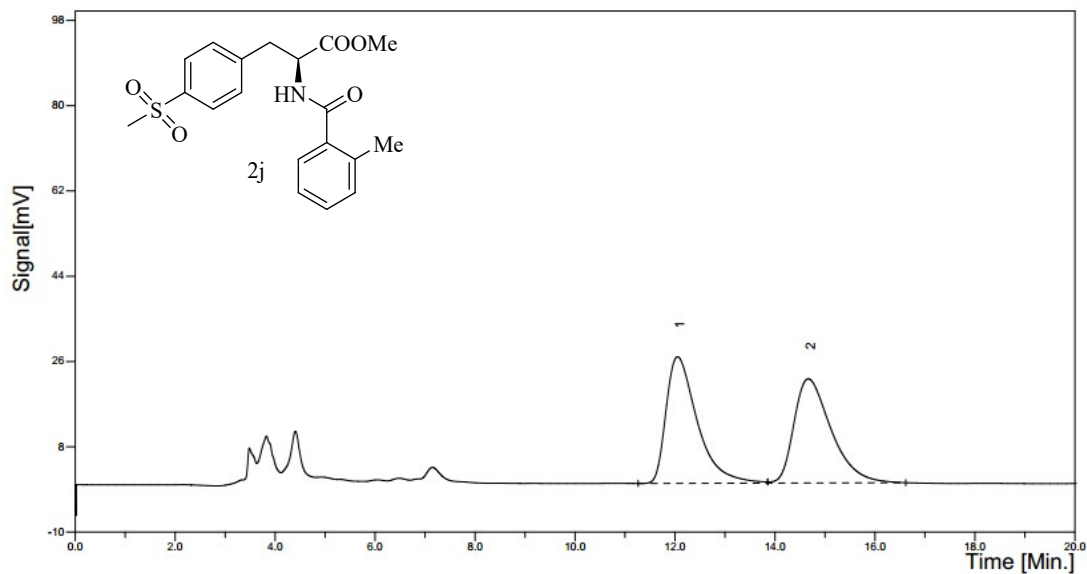

| Peak | RT (min) | Heigh (mv) | Area (mV*s) | Area (%) |
|------|----------|------------|-------------|----------|
| 1    | 12.05167 | 26.72      | 1159.48     | 50.5176  |
| 2    | 14.66750 | 21.99      | 1135.72     | 49.4824  |

### Enantio-enriched product

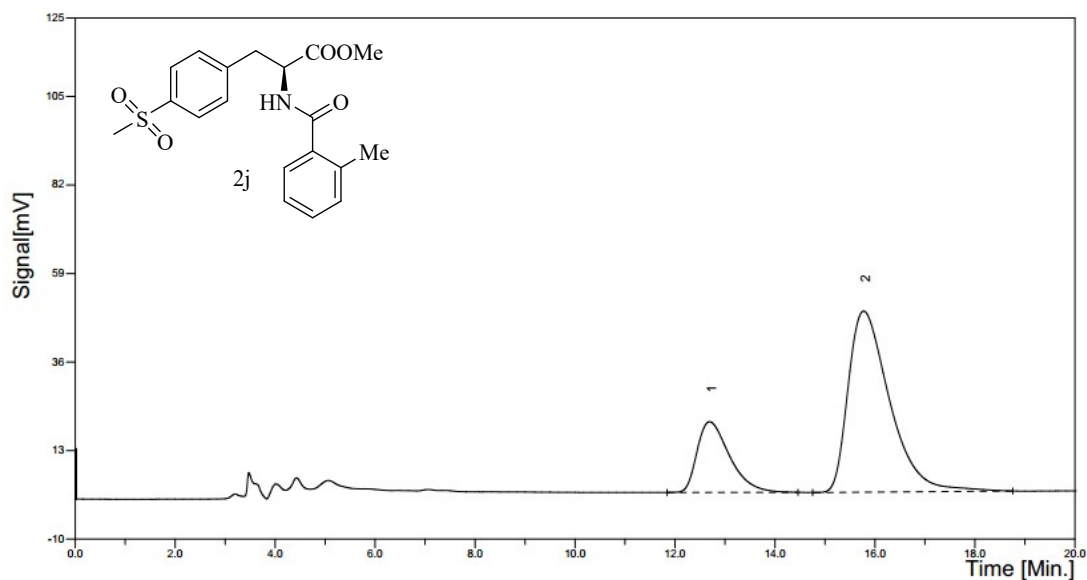

| Peak | RT (min) | Heigh (mv) | Area (mV*s) | Area (%) |
|------|----------|------------|-------------|----------|
| 1    | 12.69333 | 18.37      | 828.69      | 23.4037  |
| 2    | 15.77333 | 47.06      | 2712.15     | 76.5963  |

**HPLC Condition: Column:** DAICEL Chiralpak OJ-H column;

**Eluent:** *n*-hexane/ethanol = 60/40; **Flow rate:** 1.0 mL/min; **Detection:** UV 254 nm.

### Racemic standard

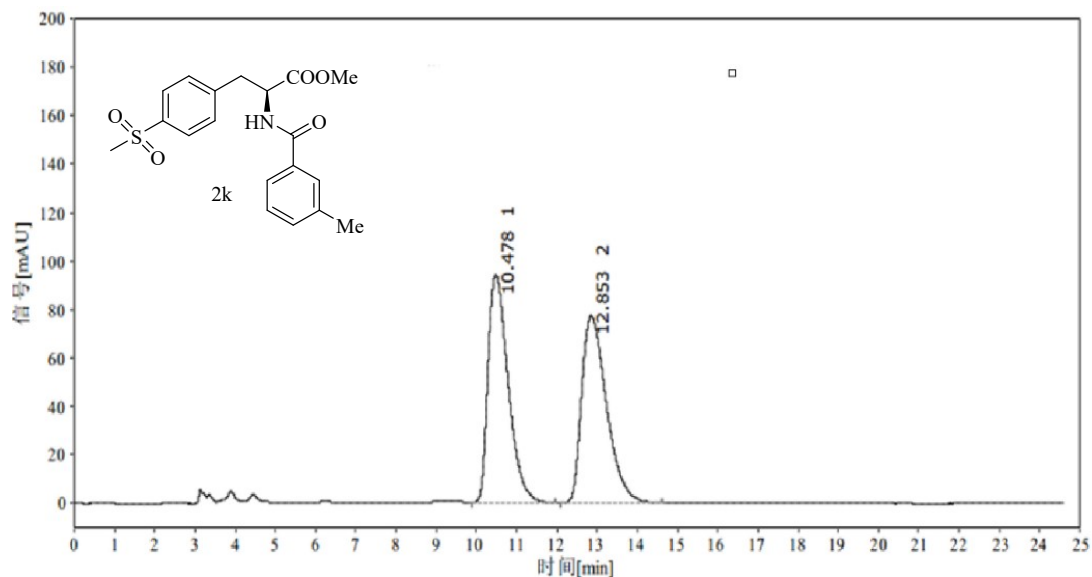

| Peak | RT (min) | Heigh (mv) | Area (mV*s) | Area (%) |
|------|----------|------------|-------------|----------|
| 1    | 10.478   | 93.969     | 3269.473    | 49.7     |
| 2    | 12.853   | 77.233     | 3304.802    | 50.3     |

### Enantio-enriched product

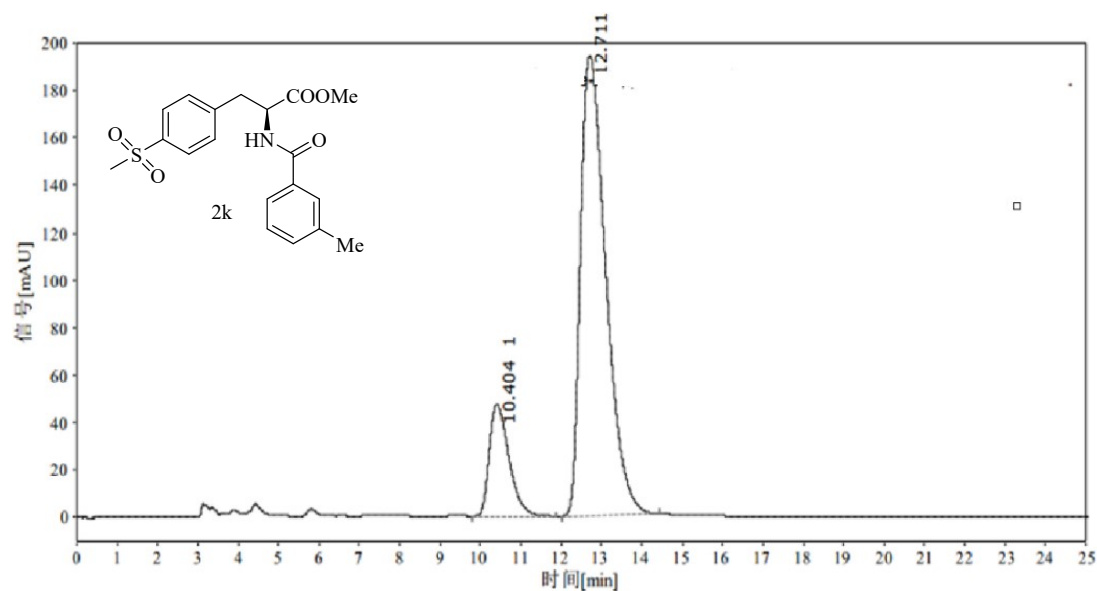

| Peak | RT (min) | Heigh (mv) | Area (mV*s) | Area (%) |
|------|----------|------------|-------------|----------|
| 1    | 10.404   | 47.110     | 1601.623    | 15.9     |
| 2    | 12.711   | 194.026    | 8451.186    | 84.1     |

**HPLC Condition: Column:** DAICEL Chiralpak OJ-H column;

**Eluent:** *n*-hexane/ethanol = 60/40; **Flow rate:** 1.0 mL/min; **Detection:** UV 254 nm.

### Racemic standard

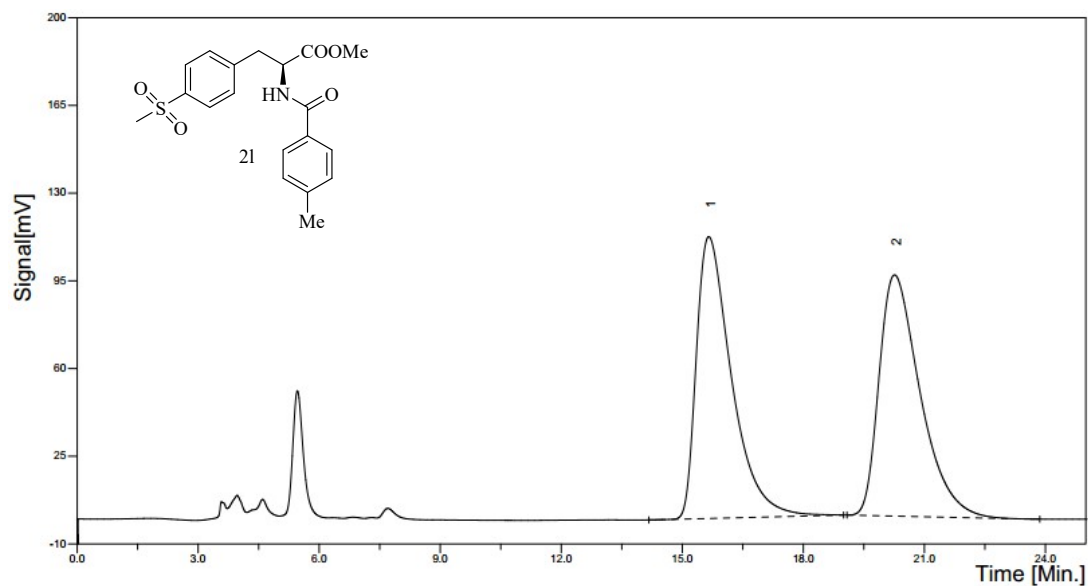

| Peak | RT (min) | Heigh (mv) | Area (mV*s) | Area (%) |
|------|----------|------------|-------------|----------|
| 1    | 15.65583 | 112.45     | 6801.61     | 50.0113  |
| 2    | 20.26083 | 96.24      | 6798.53     | 49.9887  |

### Enantio-enriched product

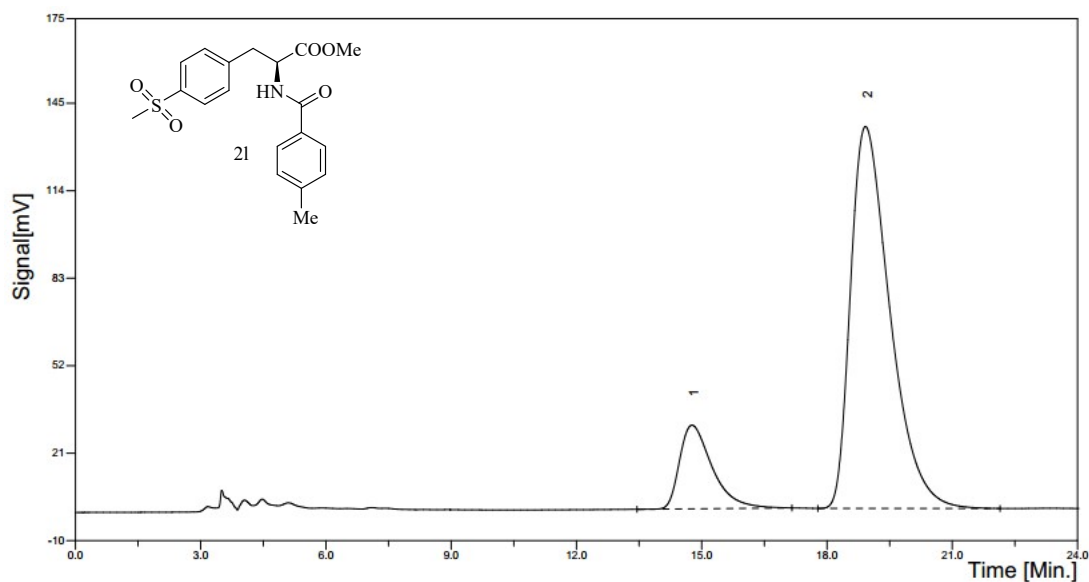

| Peak | RT (min) | Heigh (mv) | Area (mV*s) | Area (%) |
|------|----------|------------|-------------|----------|
| 1    | 14.76583 | 29.65      | 1608.15     | 15.3444  |
| 2    | 18.92250 | 135.36     | 8872.22     | 84.6556  |

**HPLC Condition: Column:** DAICEL Chiralpak OJ-H column;

**Eluent:** *n*-hexane/ethanol = 60/40; **Flow rate:** 1.0 mL/min; **Detection:** UV 254 nm.

### Racemic standard

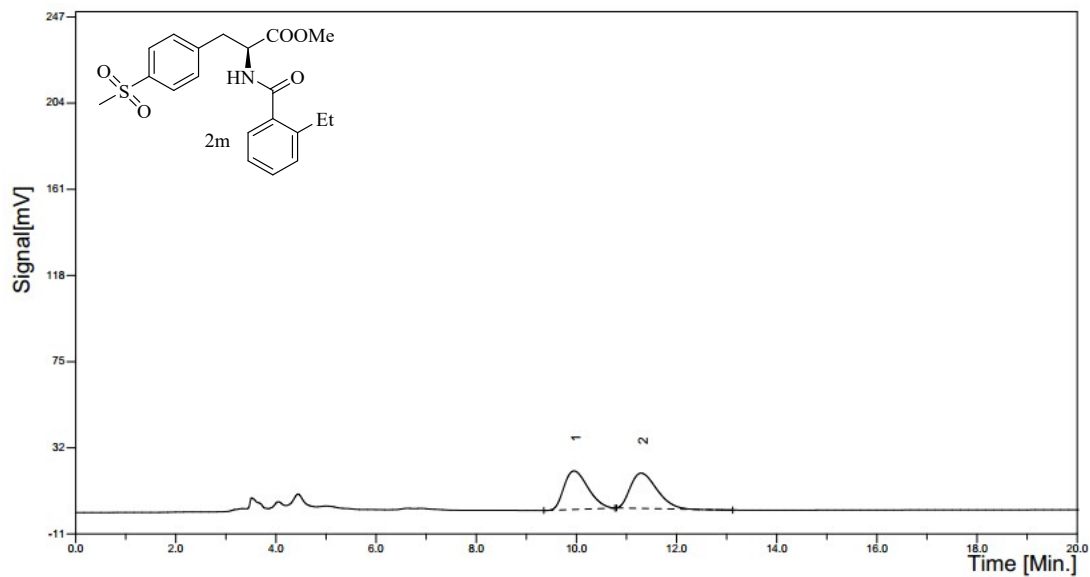

| Peak | RT (min) | Heigh (mv) | Area (mV*s) | Area (%) |
|------|----------|------------|-------------|----------|
| 1    | 9.95333  | 19.23      | 640.82      | 49.7109  |
| 2    | 11.29250 | 17.59      | 648.27      | 50.2891  |

### Enantio-enriched product

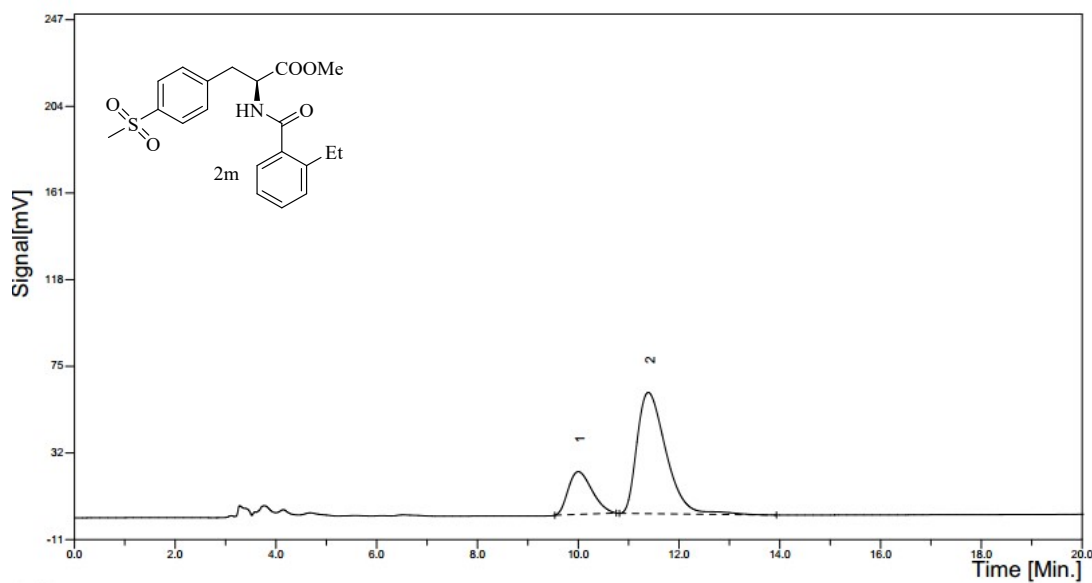

| Peak | RT (min) | Heigh (mv) | Area (mV*s) | Area (%) |
|------|----------|------------|-------------|----------|
| 1    | 10.00000 | 21.22      | 695.26      | 22.3586  |
| 2    | 11.39083 | 60.18      | 2414.34     | 77.6414  |

**HPLC Condition: Column:** DAICEL Chiralpak OJ-H column;

**Eluent:** *n*-hexane/ethanol = 60/40; **Flow rate:** 1.0 mL/min; **Detection:** UV 254 nm.

### Racemic standard

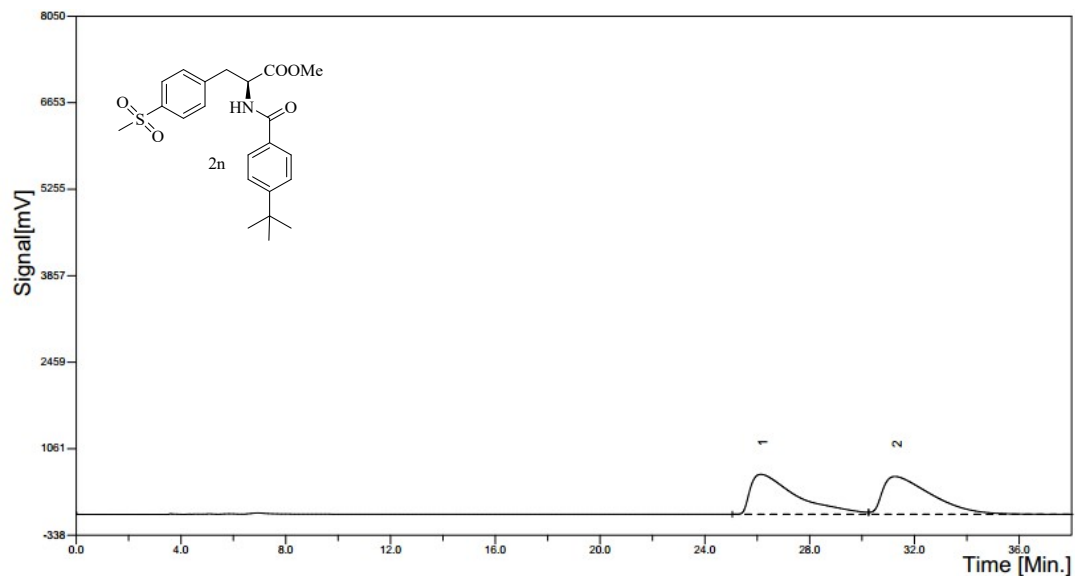

| Peak | RT (min) | Heigh (mv) | Area (mV*s) | Area (%) |
|------|----------|------------|-------------|----------|
| 1    | 26.13917 | 645.62     | 79097.44    | 50.0758  |
| 2    | 31.25667 | 610.87     | 78858.02    | 49.9242  |

### Enantio-enriched product

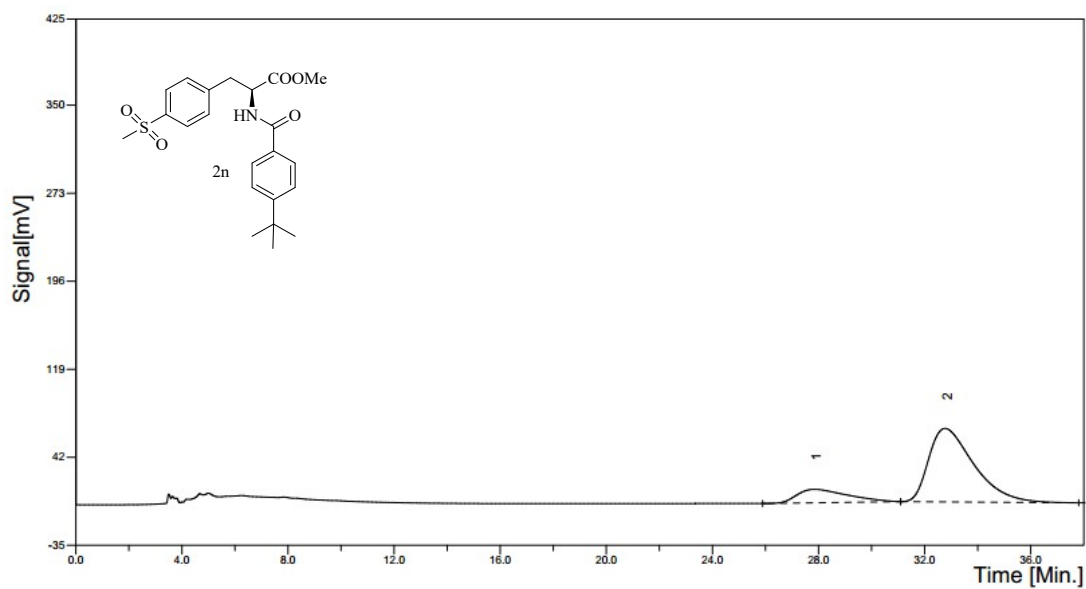

| Peak | RT (min) | Heigh (mv) | Area (mV*s) | Area (%) |
|------|----------|------------|-------------|----------|
| 1    | 27.84292 | 11.76      | 1538.93     | 16.8661  |
| 2    | 32.77083 | 64.30      | 7585.45     | 83.1339  |

**HPLC Condition: Column:** DAICEL Chiralpak OJ-H column;

**Eluent:** *n*-hexane/ethanol = 80/20; **Flow rate:** 1.0 mL/min; **Detection:** UV 254 nm.

### Racemic standard

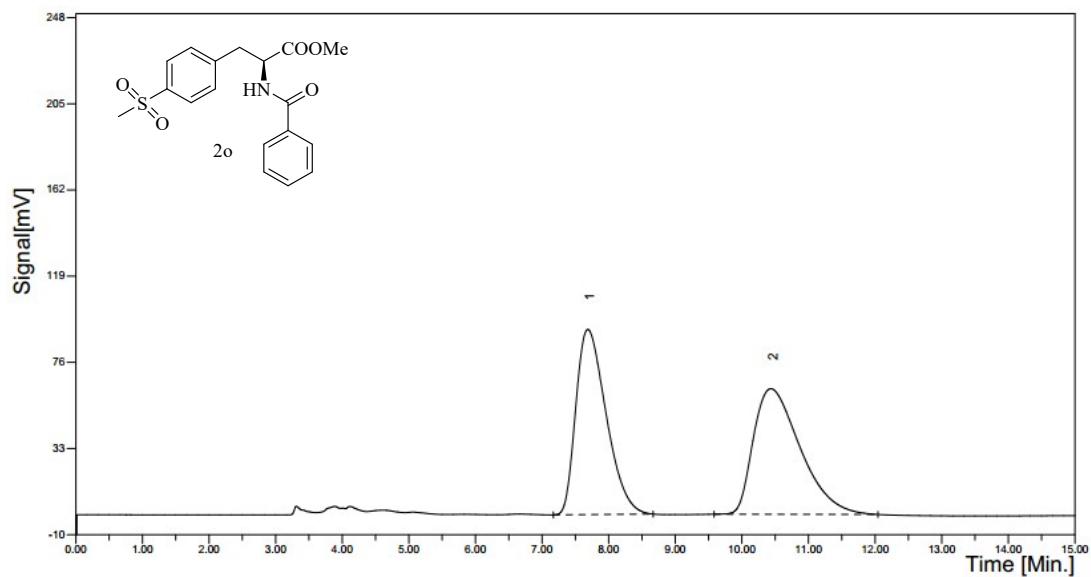

| Peak | RT (min) | Heigh (mv) | Area (mV*s) | Area (%) |
|------|----------|------------|-------------|----------|
| 1    | 7.68583  | 92.42      | 2925.74     | 48.8631  |
| 2    | 10.43500 | 62.66      | 3061.89     | 51.1369  |

### Enantio-enriched product

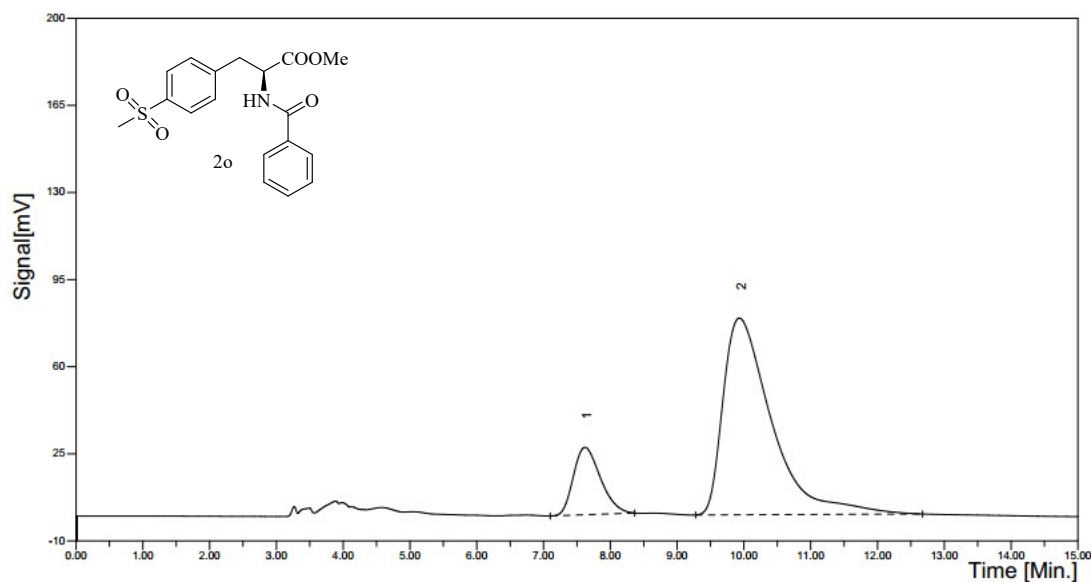

| Peak | RT (min) | Heigh (mv) | Area (mV*s) | Area (%) |
|------|----------|------------|-------------|----------|
| 1    | 7.62000  | 27.08      | 763.26      | 16.0286  |
| 2    | 9.93083  | 79.05      | 3998.60     | 83.9714  |

**HPLC Condition: Column:** DAICEL Chiralpak OD-H column;

**Eluent:** *n*-hexane/ethanol = 70/30; **Flow rate:** 1.0 mL/min; **Detection:** UV 254 nm.



### Racemic standard

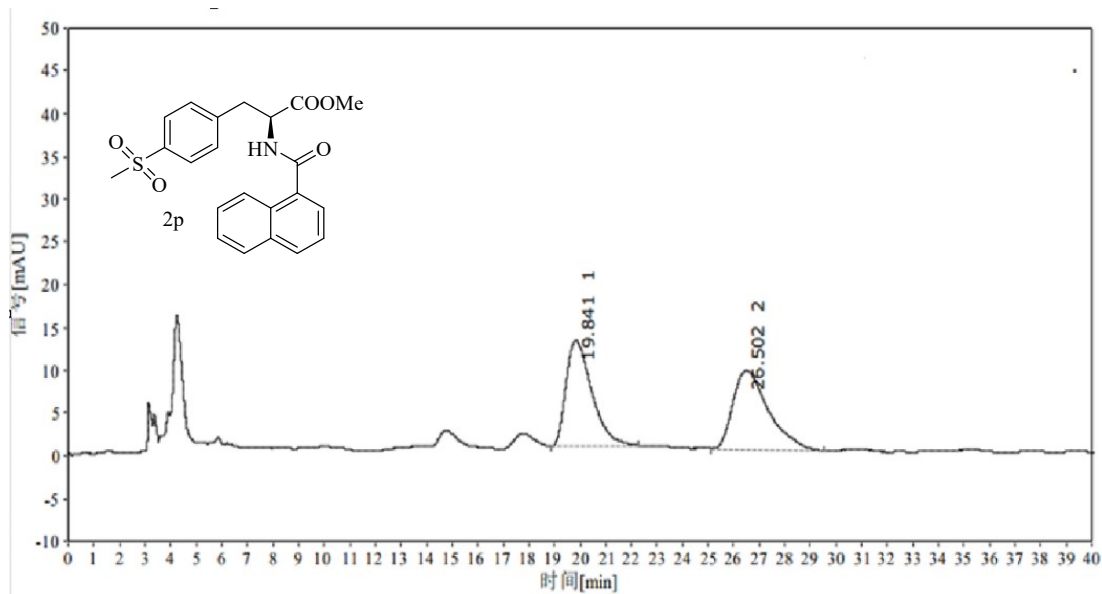

| Peak | RT (min) | Heigh (mv) | Area (mV*s) | Area (%) |
|------|----------|------------|-------------|----------|
| 1    | 19.841   | 12.369     | 846.762     | 49.0     |
| 2    | 26.502   | 9.215      | 898.300     | 51.0     |

### Enantio-enriched product

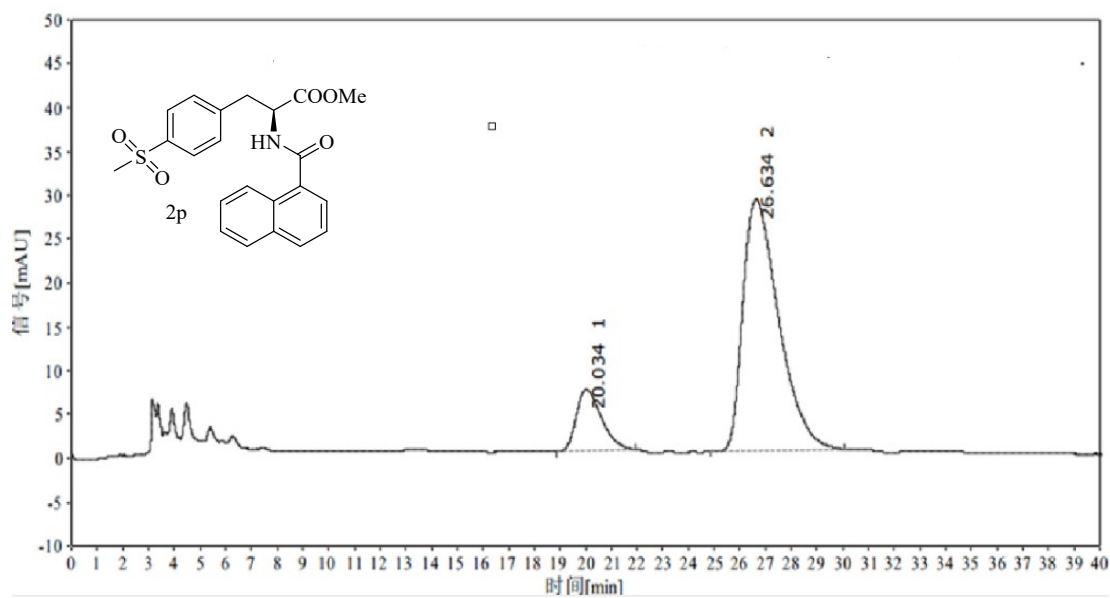

| Peak | RT (min) | Heigh (mv) | Area (mV*s) | Area (%) |
|------|----------|------------|-------------|----------|
| 1    | 20.034   | 7.015      | 480.721     | 14.6     |
| 2    | 28.758   | 28.758     | 2801.63     | 85.4     |

**HPLC Condition: Column:** DAICEL Chiralpak OJ-H column;

**Eluent:** *n*-hexane/ethanol = 70/30; **Flow rate:** 1.0 mL/min; **Detection:** UV 254 nm.

### Racemic standard

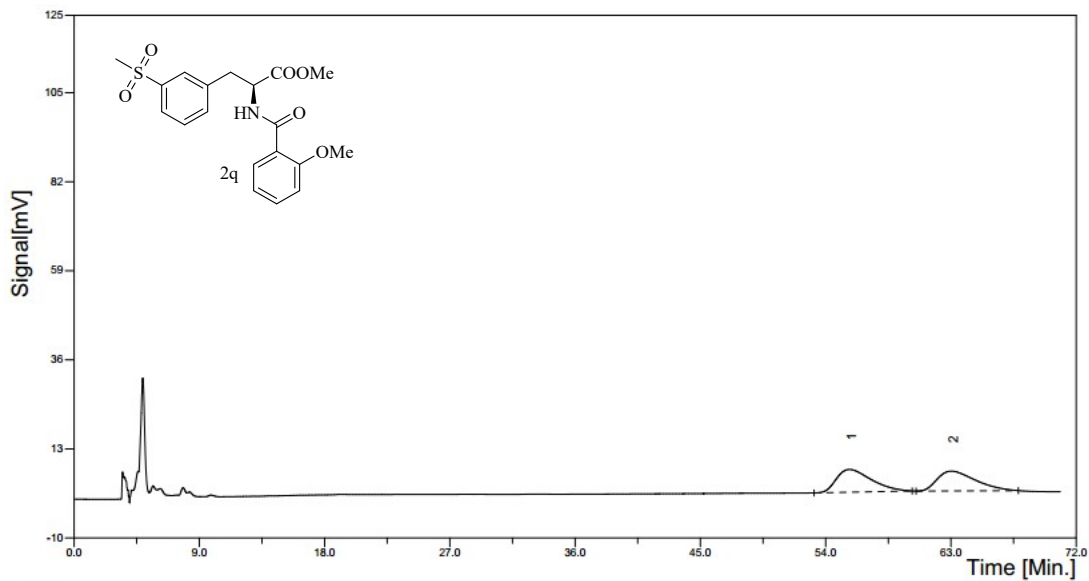

| Peak | RT (min) | Heigh (mv) | Area (mV*s) | Area (%) |
|------|----------|------------|-------------|----------|
| 1    | 55.71083 | 5.88       | 1025.47     | 51.2656  |
| 2    | 63.02125 | 5.12       | 974.84      | 48.7344  |

### Enantio-enriched product

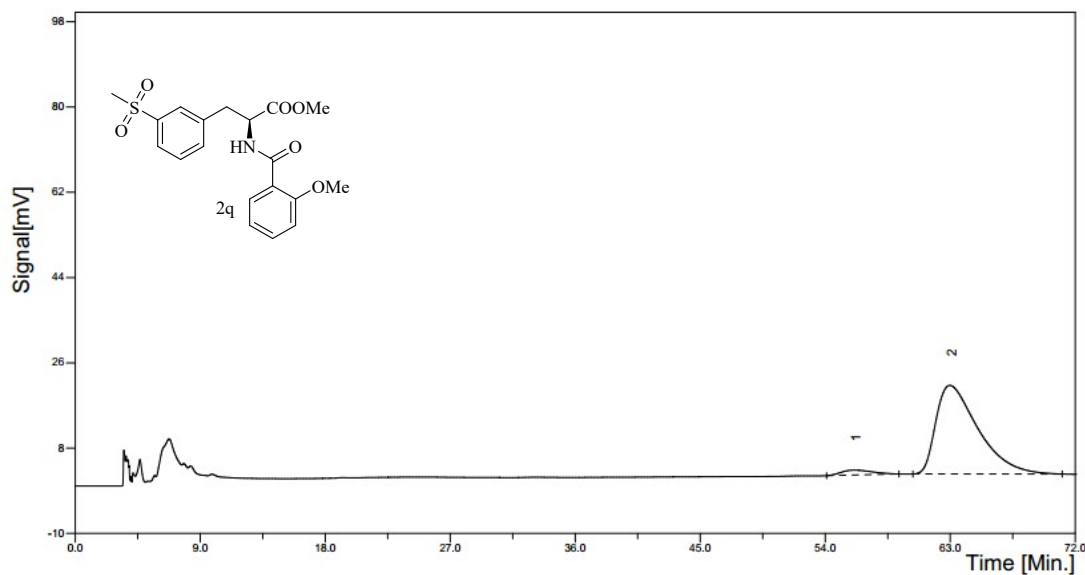

| Peak | RT (min) | Heigh (mv) | Area (mV*s) | Area (%) |
|------|----------|------------|-------------|----------|
| 1    | 56.08167 | 1.03       | 159.92      | 3.9019   |
| 2    | 62.97250 | 18.70      | 3938.55     | 96.0981  |

**HPLC Condition: Column:** DAICEL Chiralpak OJ-H column;

**Eluent:** *n*-hexane/ethanol = 80/20; **Flow rate:** 1.0 mL/min; **Detection:** UV 254 nm.

### Racemic standard

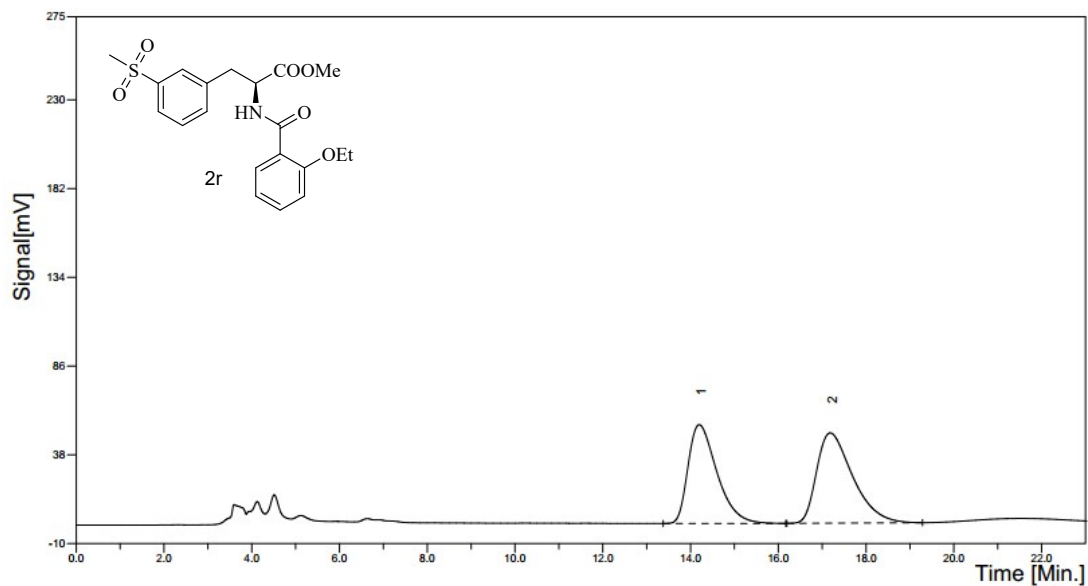

| Peak | RT (min) | Heigh (mv) | Area (mV*s) | Area (%) |
|------|----------|------------|-------------|----------|
| 1    | 14.19750 | 53.45      | 2445.12     | 46.7696  |
| 2    | 17.18417 | 48.84      | 2782.89     | 53.2304  |

### Enantio-enriched product

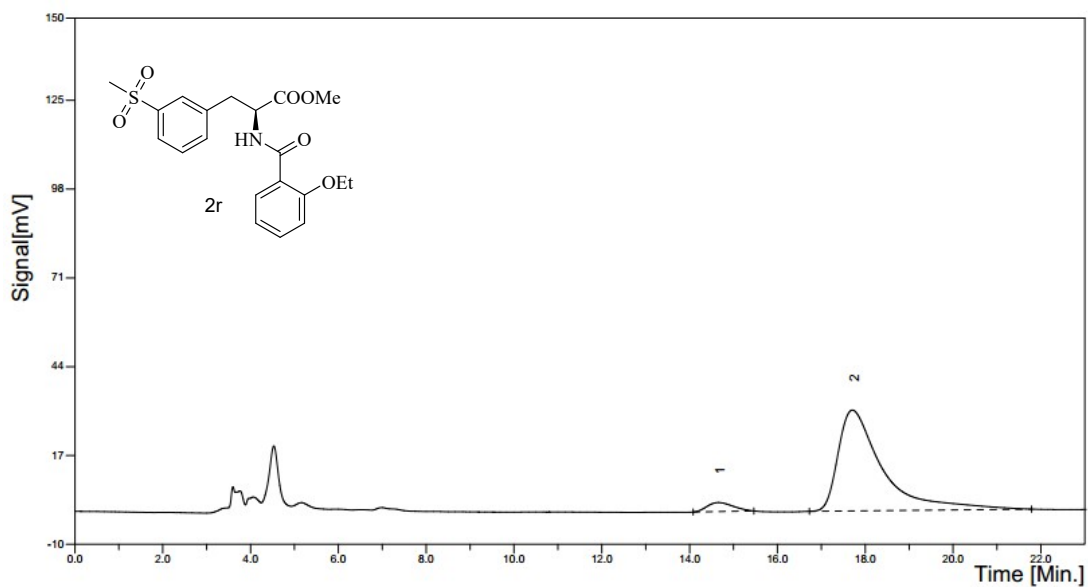

| Peak | RT (min) | Heigh (mv) | Area (mV*s) | Area (%) |
|------|----------|------------|-------------|----------|
| 1    | 14.65250 | 2.75       | 112.25      | 4.9746   |
| 2    | 17.70583 | 30.64      | 2144.24     | 95.0254  |

**HPLC Condition: Column:** DAICEL Chiralpak OJ-H column;

**Eluent:** *n*-hexane/ethanol = 60/40; **Flow rate:** 1.0 mL/min; **Detection:** UV 254 nm.
